# Supplementary material for: A Systematic Prediction of Multiple Drug-Target Interactions from Chemical, Genomic, and Pharmacological Data
Source: PLoS One. 2012 May 30;7(5):e37608. doi: 10.1371/journal.pone.0037608 (PMC3364341; doi:10.1371/journal.pone.0037608)
Supplement: Supporting Information S1 — The omitted drugs and targets in building models. (XLSX) [file pone.0037608.s001.xlsx]

## Sheet: WCID
Table S1. The omitted drugs and targets in building models.
Drug DrugBank ID	Drug generic name
DB00225	Gadodiamide
DB00258	Calcium Acetate
DB00261	Anagrelide
DB00286	Conjugated Estrogens
DB00314	Capreomycin
DB00319	Piperacillin
DB00326	Calcium Gluceptate
DB00375	Colestipol
DB00416	Metocurine Iodide
DB00435	Nitric Oxide
DB00447	Loracarbef
DB00462	Methylscopolamine
DB00466	Picrotoxin
DB00510	Divalproex sodium
DB00516	Bentoquatam
DB00517	Anisotropine Methylbromide
DB00538	Gadoversetamide
DB00565	Cisatracurium Besylate
DB00569	Fondaparinux sodium
DB00597	Gadoteridol
DB00602	Ivermectin
DB00653	Magnesium Sulfate
DB00658	Sevelamer
DB00667	Histamine Phosphate
DB00725	Homatropine Methylbromide
DB00729	Diphemanil Methylsulfate
DB00743	Gadobenate Dimeglumine
DB00761	Potassium Chloride
DB00789	Gadopentetate dimeglumine
DB00815	Sodium lauryl sulfate
DB00930	Colesevelam
DB00941	Hexafluronium
DB00958	Carboplatin
DB00985	Dimenhydrinate
DB01040	Hydroxystilbamidine Isethionate
DB01109	Heparin
DB01160	Dinoprost Tromethamine
DB01164	Calcium Chloride
DB01223	Aminophylline
DB01287	Dihydroergotoxine
DB01303	Oxtriphylline
DB01344	Polystyrene sulfonate
DB01346	Quinidine barbiturate
DB01356	Lithium
DB01370	Aluminium
DB01375	Dihydroxyaluminium
DB01377	Magnesium oxide
DB01378	Magnesium
DB01390	Sodium bicarbonate
DB01397	Magnesium salicylate
DB01398	Salicylate-sodium
DB01401	Trisalicylate-choline
DB01477	Codeine methylbromide
DB01482	Fenethylline
DB01494	Chloral betaine
DB01495	Dichloralphenazone
DB01583	Liotrix
DB01591	Solifenacin
DB01592	Iron
DB01593	Zinc
DB01636	Clorocruoro Hem
DB01663	Lambda-Bis(2,2'-Bipyridine)-(5-Methyl-2-2'-Bipyridine)-C9-Adamantane Ruthenium (Ii)
DB01794	bis(molybdopterin)tungsten cofactor
DB01848	Isocitrate Calcium Complex
DB01853	Bacteriochlorophyll A
DB01932	5-Methylpyrrole
DB02003	Delta-Bis(2,2'-Bipyridine)Imidazole Ruthenium (Ii)
DB02073	Biliverdine Ix Alpha
DB02133	Chlorophyll A
DB02147	Cyclo-Tetrametavanadate
DB02183	Adenosine-5'-Ditungstate
DB02272	Porphobilinogen
DB02373	Adenosine Monotungstate
DB02626	Phenylferricrocin-Iron
DB02653	Delta-Bis(2,2'-Bipyridine)-(5-Methyl-2-2'-Bipyridine)-C2-Adamantane Ruthenium (Ii)
DB02661	Adenosine-5'-Diphosphate-2',3'-Vanadate
DB02681	Meta Vanadate
DB02721	4-Iodopyrazole
DB02863	Alpha Chlorophyll A
DB02864	Biliverdin Ix Gamma Chromophore
DB02912	Propionyl Coenzyme A
DB03205	Pyrroloquinoline Quinone
DB03492	Lambda-Bis(2,2'-Bipyridine)Imidazole Osmium (Ii)
DB03512	Uridine-2',3'-Vanadate
DB03727	Coproporphyrin I
DB03871	Lambda-Bis(2,2'-Bipyridine)Imidazole Ruthenium (Ii)
DB03875	Delta-Bis(2,2'-Bipyridine)-(5-Methyl-2-2'-Bipyridine)-C9-Adamantane Ruthenium (Ii)
DB04031	Serine Vanadate
DB04100	(1,10 Phenanthroline)-(Tri-Carbon Monoxide) Rhenium (I)
DB04119	Hexatantalum Dodecabromide
DB04148	Terminal Dimethyl
DB04156	Aspartate Beryllium Trifluoride
DB04219	Trivanadate
DB04363	Mesobiliverdin Iv Alpha
DB04367	Debromohymenialdisine
DB04397	Alpha-D-Glucose-1-Phosphate-6-Vanadate
DB04414	Heptamolybdate
DB04428	Tungstopterin Cofactor
DB04461	Coproporphyrin Iii
DB04494	Mo(Vi)(=O)(Oh)2 Cluster
DB04550	Delta-Bis(2,2'-Bipyridine)Imidazole Osmium (Ii)
DB04803	Verdoheme
DB04810	Salophen-10-carboxylate iron chelate
DB04811	Salophen iron chelate
DB04817	Dipyrone
DB04819	Methapyrilene
DB04834	Rapacuronium
DB04836	Amineptine
DB05245	Silver sulfadiazine
DB05260	Gallium nitrate
DB05630	Sodium stibogluconate
DB06689	Ethanolamine Oleate
DB06703	Gadobutrol
DB06705	Gadofosveset trisodium
DB06715	Potassium Iodide
DB06716	Fospropofol
DB07424	tripotassium (1R)-4-biphenyl-4-yl-1-phosphonatobutane-1-sulfonate
DB08276	N-METHYL O-NITROPHENYL AMINOETHYLDIPHOSPHATE BERYLLIUM TRIFLUORIDE
Protein DrugBank ID	Protein name
1864	RET proto-oncogene
3689	Endoglucanase A
4133	Trichotoxin_A50E
4136	Epilancin 15X
4139	Ramoplanin - Actinoplanes sp
4140	Acetyl Group - Synthetic construct
5878	Alpha-7 nicotinic cholinergic receptor subunit
6411	Cytochrome b6-f complex subunit 8
6516	Crumbs-like protein 2
6589	Delta-hemolysin
6720	30S ribosomal protein Thx
6834	Thiostrepton
