# Supplementary material for: A Systematic Prediction of Multiple Drug-Target Interactions from Chemical, Genomic, and Pharmacological Data
Source: PLoS One. 2012 May 30;7(5):e37608. doi: 10.1371/journal.pone.0037608 (PMC3364341; doi:10.1371/journal.pone.0037608)
Supplement: Supporting Information S2 — All drug molecules used in building models. (XLSX) [file pone.0037608.s002.xlsx]

## Sheet: Sheet1
Table S2. All drug molecules used in building models
Drug DrugBank ID	Drug generic name
DB00114	Pyridoxal Phosphate
DB00115	Cyanocobalamin
DB00116	Tetrahydrofolic acid
DB00117	L-Histidine
DB00118	S-Adenosylmethionine
DB00119	Pyruvic acid
DB00120	L-Phenylalanine
DB00121	Biotin
DB00122	Choline
DB00123	L-Lysine
DB00125	L-Arginine
DB00126	Vitamin C
DB00127	Spermine
DB00128	L-Aspartic Acid
DB00129	L-Ornithine
DB00130	L-Glutamine
DB00131	Adenosine monophosphate
DB00132	Alpha-Linolenic Acid
DB00133	L-Serine
DB00134	L-Methionine
DB00135	L-Tyrosine
DB00136	Calcitriol
DB00137	Xanthophyll
DB00138	L-Cystine
DB00139	Succinic acid
DB00140	Riboflavin
DB00141	N-Acetyl-D-glucosamine
DB00142	L-Glutamic Acid
DB00143	Glutathione
DB00144	Phosphatidylserine
DB00145	Glycine
DB00146	Calcidiol
DB00147	Pyridoxal
DB00148	Creatine
DB00149	L-Leucine
DB00150	L-Tryptophan
DB00151	L-Cysteine
DB00152	Thiamine
DB00153	Ergocalciferol
DB00154	gamma-Homolinolenic acid
DB00155	L-Citrulline
DB00156	L-Threonine
DB00157	NADH
DB00158	Folic Acid
DB00159	Icosapent
DB00160	L-Alanine
DB00161	L-Valine
DB00162	Vitamin A
DB00163	Vitamin E
DB00165	Pyridoxine
DB00166	Lipoic Acid
DB00167	L-Isoleucine
DB00168	Aspartame
DB00169	Cholecalciferol
DB00170	Menadione
DB00171	Adenosine triphosphate
DB00172	L-Proline
DB00173	Adenine
DB00174	L-Asparagine
DB00175	Pravastatin
DB00176	Fluvoxamine
DB00177	Valsartan
DB00178	Ramipril
DB00179	Masoprocol
DB00180	Flunisolide
DB00181	Baclofen
DB00182	Amphetamine
DB00183	Pentagastrin
DB00184	Nicotine
DB00185	Cevimeline
DB00186	Lorazepam
DB00187	Esmolol
DB00188	Bortezomib
DB00189	Ethchlorvynol
DB00190	Carbidopa
DB00191	Phentermine
DB00192	Indecainide
DB00193	Tramadol
DB00194	Vidarabine
DB00195	Betaxolol
DB00196	Fluconazole
DB00197	Troglitazone
DB00198	Oseltamivir
DB00199	Erythromycin
DB00200	Hydroxocobalamin
DB00201	Caffeine
DB00202	Succinylcholine
DB00203	Sildenafil
DB00204	Dofetilide
DB00205	Pyrimethamine
DB00206	Reserpine
DB00207	Azithromycin
DB00208	Ticlopidine
DB00209	Trospium
DB00210	Adapalene
DB00211	Midodrine
DB00212	Remikiren
DB00213	Pantoprazole
DB00214	Torasemide
DB00215	Citalopram
DB00216	Eletriptan
DB00217	Bethanidine
DB00218	Moxifloxacin
DB00219	Oxyphenonium
DB00220	Nelfinavir
DB00221	Isoetharine
DB00222	Glimepiride
DB00223	Diflorasone
DB00224	Indinavir
DB00226	Guanadrel Sulfate
DB00227	Lovastatin
DB00228	Enflurane
DB00229	Cefotiam
DB00230	Pregabalin
DB00231	Temazepam
DB00232	Methyclothiazide
DB00233	Aminosalicylic Acid
DB00234	Reboxetine
DB00235	Milrinone
DB00236	Pipobroman
DB00237	Butabarbital
DB00238	Nevirapine
DB00239	Oxiconazole
DB00240	Alclometasone
DB00241	Butalbital
DB00242	Cladribine
DB00243	Ranolazine
DB00244	Mesalazine
DB00245	Benztropine
DB00246	Ziprasidone
DB00247	Methysergide
DB00248	Cabergoline
DB00249	Idoxuridine
DB00250	Dapsone
DB00251	Terconazole
DB00252	Phenytoin
DB00253	Medrysone
DB00254	Doxycycline
DB00255	Diethylstilbestrol
DB00256	Lymecycline
DB00257	Clotrimazole
DB00259	Sulfanilamide
DB00260	Cycloserine
DB00262	Carmustine
DB00263	Sulfisoxazole
DB00264	Metoprolol
DB00265	Crotamiton
DB00266	Dicumarol
DB00267	Cefmenoxime
DB00268	Ropinirole
DB00269	Chlorotrianisene
DB00270	Isradipine
DB00271	Diatrizoate
DB00272	Betazole
DB00273	Topiramate
DB00274	Cefmetazole
DB00275	Olmesartan
DB00276	Amsacrine
DB00277	Theophylline
DB00278	Argatroban
DB00279	Liothyronine
DB00280	Disopyramide
DB00281	Lidocaine
DB00282	Pamidronate
DB00283	Clemastine
DB00284	Acarbose
DB00285	Venlafaxine
DB00287	Travoprost
DB00288	Amcinonide
DB00289	Atomoxetine
DB00290	Bleomycin
DB00291	Chlorambucil
DB00292	Etomidate
DB00293	Raltitrexed
DB00294	Etonogestrel
DB00295	Morphine
DB00296	Ropivacaine
DB00297	Bupivacaine
DB00298	Dapiprazole
DB00299	Penciclovir
DB00300	Tenofovir
DB00301	Flucloxacillin
DB00302	Tranexamic Acid
DB00303	Ertapenem
DB00304	Desogestrel
DB00305	Mitomycin
DB00306	Talbutal
DB00307	Bexarotene
DB00308	Ibutilide
DB00309	Vindesine
DB00310	Chlorthalidone
DB00311	Ethoxzolamide
DB00312	Pentobarbital
DB00313	Valproic Acid
DB00315	Zolmitriptan
DB00316	Acetaminophen
DB00317	Gefitinib
DB00318	Codeine
DB00320	Dihydroergotamine
DB00321	Amitriptyline
DB00322	Floxuridine
DB00323	Tolcapone
DB00324	Fluorometholone
DB00325	Nitroprusside
DB00327	Hydromorphone
DB00328	Indomethacin
DB00330	Ethambutol
DB00331	Metformin
DB00332	Ipratropium bromide
DB00333	Methadone
DB00334	Olanzapine
DB00335	Atenolol
DB00336	Nitrofurazone
DB00337	Pimecrolimus
DB00338	Omeprazole
DB00339	Pyrazinamide
DB00340	Metixene
DB00341	Cetirizine
DB00342	Terfenadine
DB00343	Diltiazem
DB00344	Protriptyline
DB00345	Aminohippurate
DB00346	Alfuzosin
DB00347	Trimethadione
DB00348	Nitisinone
DB00349	Clobazam
DB00350	Minoxidil
DB00351	Megestrol
DB00352	Thioguanine
DB00353	Methylergonovine
DB00354	Buclizine
DB00355	Aztreonam
DB00356	Chlorzoxazone
DB00357	Aminoglutethimide
DB00358	Mefloquine
DB00359	Sulfadiazine
DB00360	Tetrahydrobiopterin
DB00361	Vinorelbine
DB00362	Anidulafungin
DB00363	Clozapine
DB00364	Sucralfate
DB00365	Grepafloxacin
DB00366	Doxylamine
DB00367	Levonorgestrel
DB00368	Norepinephrine
DB00369	Cidofovir
DB00370	Mirtazapine
DB00371	Meprobamate
DB00372	Thiethylperazine
DB00373	Timolol
DB00374	Treprostinil
DB00376	Trihexyphenidyl
DB00377	Palonosetron
DB00378	Dydrogesterone
DB00379	Mexiletine
DB00380	Dexrazoxane
DB00381	Amlodipine
DB00382	Tacrine
DB00383	Oxyphencyclimine
DB00384	Triamterene
DB00385	Valrubicin
DB00387	Procyclidine
DB00388	Phenylephrine
DB00389	Carbimazole
DB00390	Digoxin
DB00391	Sulpiride
DB00392	Ethopropazine
DB00393	Nimodipine
DB00394	Beclomethasone
DB00395	Carisoprodol
DB00396	Progesterone
DB00397	Phenylpropanolamine
DB00398	Sorafenib
DB00399	Zoledronate
DB00400	Griseofulvin
DB00401	Nisoldipine
DB00402	Eszopiclone
DB00403	Ceruletide
DB00404	Alprazolam
DB00405	Dexbrompheniramine
DB00406	Gentian Violet
DB00407	Ardeparin
DB00408	Loxapine
DB00409	Remoxipride
DB00410	Mupirocin
DB00411	Carbachol
DB00412	Rosiglitazone
DB00413	Pramipexole
DB00414	Acetohexamide
DB00415	Ampicillin
DB00417	Penicillin V
DB00418	Secobarbital
DB00419	Miglustat
DB00420	Promazine
DB00421	Spironolactone
DB00422	Methylphenidate
DB00423	Methocarbamol
DB00424	Hyoscyamine
DB00425	Zolpidem
DB00426	Famciclovir
DB00427	Triprolidine
DB00428	Streptozocin
DB00429	Carboprost Tromethamine
DB00430	Cefpiramide
DB00431	Lindane
DB00432	Trifluridine
DB00433	Prochlorperazine
DB00434	Cyproheptadine
DB00436	Bendroflumethiazide
DB00437	Allopurinol
DB00438	Ceftazidime
DB00439	Cerivastatin
DB00440	Trimethoprim
DB00441	Gemcitabine
DB00442	Entecavir
DB00443	Betamethasone
DB00444	Teniposide
DB00445	Epirubicin
DB00446	Chloramphenicol
DB00448	Lansoprazole
DB00449	Dipivefrin
DB00450	Droperidol
DB00451	Levothyroxine
DB00452	Framycetin
DB00453	Clomocycline
DB00454	Meperidine
DB00455	Loratadine
DB00456	Cefalotin
DB00457	Prazosin
DB00458	Imipramine
DB00459	Acitretin
DB00460	Verteporfin
DB00461	Nabumetone
DB00463	Metharbital
DB00464	Sodium Tetradecyl Sulfate
DB00465	Ketorolac
DB00467	Enoxacin
DB00468	Quinine
DB00469	Tenoxicam
DB00470	Dronabinol
DB00471	Montelukast
DB00472	Fluoxetine
DB00473	Hexylcaine
DB00474	Methohexital
DB00475	Chlordiazepoxide
DB00476	Duloxetine
DB00477	Chlorpromazine
DB00478	Rimantadine
DB00479	Amikacin
DB00480	Lenalidomide
DB00481	Raloxifene
DB00482	Celecoxib
DB00483	Gallamine Triethiodide
DB00484	Brimonidine
DB00485	Dicloxacillin
DB00486	Nabilone
DB00487	Pefloxacin
DB00488	Altretamine
DB00489	Sotalol
DB00490	Buspirone
DB00491	Miglitol
DB00492	Fosinopril
DB00493	Cefotaxime
DB00494	Entacapone
DB00495	Zidovudine
DB00496	Darifenacin
DB00497	Oxycodone
DB00498	Phenindione
DB00499	Flutamide
DB00500	Tolmetin
DB00501	Cimetidine
DB00502	Haloperidol
DB00503	Ritonavir
DB00504	Levallorphan
DB00505	Tridihexethyl
DB00506	Norgestrel
DB00507	Nitazoxanide
DB00508	Triflupromazine
DB00509	Dextrothyroxine
DB00511	Acetyldigitoxin
DB00512	Vancomycin
DB00513	Aminocaproic Acid
DB00514	Dextromethorphan
DB00515	Cisplatin
DB00518	Albendazole
DB00519	Trandolapril
DB00520	Caspofungin
DB00521	Carteolol
DB00522	Bentiromide
DB00523	Alitretinoin
DB00524	Metolazone
DB00525	Tolnaftate
DB00526	Oxaliplatin
DB00527	Dibucaine
DB00528	Lercanidipine
DB00529	Foscarnet
DB00530	Erlotinib
DB00531	Cyclophosphamide
DB00532	Mephenytoin
DB00533	Rofecoxib
DB00534	Chlormerodrin
DB00535	Cefdinir
DB00536	Guanidine
DB00537	Ciprofloxacin
DB00539	Toremifene
DB00540	Nortriptyline
DB00541	Vincristine
DB00542	Benazepril
DB00543	Amoxapine
DB00544	Fluorouracil
DB00545	Pyridostigmine
DB00546	Adinazolam
DB00547	Desoximetasone
DB00548	Azelaic Acid
DB00549	Zafirlukast
DB00550	Propylthiouracil
DB00551	Acetohydroxamic Acid
DB00552	Pentostatin
DB00553	Methoxsalen
DB00554	Piroxicam
DB00555	Lamotrigine
DB00556	Perflutren
DB00557	Hydroxyzine
DB00558	Zanamivir
DB00559	Bosentan
DB00560	Tigecycline
DB00561	Doxapram
DB00562	Benzthiazide
DB00563	Methotrexate
DB00564	Carbamazepine
DB00566	Succimer
DB00567	Cephalexin
DB00568	Cinnarizine
DB00570	Vinblastine
DB00571	Propranolol
DB00572	Atropine
DB00573	Fenoprofen
DB00574	Fenfluramine
DB00575	Clonidine
DB00576	Sulfamethizole
DB00577	Valaciclovir
DB00578	Carbenicillin
DB00579	Mazindol
DB00580	Valdecoxib
DB00581	Lactulose
DB00582	Voriconazole
DB00583	L-Carnitine
DB00584	Enalapril
DB00585	Nizatidine
DB00586	Diclofenac
DB00587	Cinalukast
DB00588	Fluticasone Propionate
DB00589	Lisuride
DB00590	Doxazosin
DB00591	Fluocinolone Acetonide
DB00592	Piperazine
DB00593	Ethosuximide
DB00594	Amiloride
DB00595	Oxytetracycline
DB00596	Halobetasol Propionate
DB00598	Labetalol
DB00599	Thiopental
DB00600	Monobenzone
DB00601	Linezolid
DB00603	Medroxyprogesterone
DB00604	Cisapride
DB00605	Sulindac
DB00606	Cyclothiazide
DB00607	Nafcillin
DB00608	Chloroquine
DB00609	Ethionamide
DB00610	Metaraminol
DB00611	Butorphanol
DB00612	Bisoprolol
DB00613	Amodiaquine
DB00614	Furazolidone
DB00615	Rifabutin
DB00616	Candoxatril
DB00617	Paramethadione
DB00618	Demeclocycline
DB00619	Imatinib
DB00620	Triamcinolone
DB00621	Oxandrolone
DB00622	Nicardipine
DB00623	Fluphenazine
DB00624	Testosterone
DB00625	Efavirenz
DB00626	Bacitracin
DB00627	Niacin
DB00628	Clorazepate
DB00629	Guanabenz
DB00630	Alendronate
DB00631	Clofarabine
DB00632	Docosanol
DB00633	Dexmedetomidine
DB00634	Sulfacetamide
DB00635	Prednisone
DB00636	Clofibrate
DB00637	Astemizole
DB00638	Inulin
DB00639	Butoconazole
DB00640	Adenosine
DB00641	Simvastatin
DB00642	Pemetrexed
DB00643	Mebendazole
DB00644	Gonadorelin
DB00645	Dyclonine
DB00646	Nystatin
DB00647	Propoxyphene
DB00648	Mitotane
DB00649	Stavudine
DB00650	Leucovorin
DB00651	Dyphylline
DB00652	Pentazocine
DB00654	Latanoprost
DB00655	Estrone
DB00656	Trazodone
DB00657	Mecamylamine
DB00659	Acamprosate
DB00660	Metaxalone
DB00661	Verapamil
DB00662	Trimethobenzamide
DB00663	Flumethasone Pivalate
DB00664	Sulfametopyrazine
DB00665	Nilutamide
DB00666	Nafarelin
DB00668	Epinephrine
DB00669	Sumatriptan
DB00670	Pirenzepine
DB00671	Cefixime
DB00672	Chlorpropamide
DB00673	Aprepitant
DB00674	Galantamine
DB00675	Tamoxifen
DB00676	Benzyl Benzoate
DB00677	Isoflurophate
DB00678	Losartan
DB00679	Thioridazine
DB00680	Moricizine
DB00681	Amphotericin B
DB00682	Warfarin
DB00683	Midazolam
DB00684	Tobramycin
DB00685	Trovafloxacin
DB00686	Pentosan Polysulfate
DB00687	Fludrocortisone
DB00688	Mycophenolate mofetil
DB00689	Cephaloglycin
DB00690	Flurazepam
DB00691	Moexipril
DB00692	Phentolamine
DB00693	Fluorescein
DB00694	Daunorubicin
DB00695	Furosemide
DB00696	Ergotamine
DB00697	Tizanidine
DB00698	Nitrofurantoin
DB00699	Nicergoline
DB00700	Eplerenone
DB00701	Amprenavir
DB00703	Methazolamide
DB00704	Naltrexone
DB00705	Delavirdine
DB00706	Tamsulosin
DB00707	Porfimer
DB00708	Sufentanil
DB00709	Lamivudine
DB00710	Ibandronate
DB00711	Diethylcarbamazine
DB00712	Flurbiprofen
DB00713	Oxacillin
DB00714	Apomorphine
DB00715	Paroxetine
DB00716	Nedocromil
DB00717	Norethindrone
DB00718	Adefovir Dipivoxil
DB00719	Azatadine
DB00720	Clodronate
DB00721	Procaine
DB00722	Lisinopril
DB00723	Methoxamine
DB00724	Imiquimod
DB00726	Trimipramine
DB00727	Nitroglycerin
DB00728	Rocuronium
DB00730	Thiabendazole
DB00731	Nateglinide
DB00732	Atracurium
DB00733	Pralidoxime
DB00734	Risperidone
DB00735	Naftifine
DB00736	Esomeprazole
DB00737	Meclizine
DB00738	Pentamidine
DB00739	Hetacillin
DB00740	Riluzole
DB00741	Hydrocortisone
DB00742	Mannitol
DB00744	Zileuton
DB00745	Modafinil
DB00746	Deferoxamine
DB00747	Scopolamine
DB00748	Carbinoxamine
DB00749	Etodolac
DB00750	Prilocaine
DB00751	Epinastine
DB00752	Tranylcypromine
DB00753	Isoflurane
DB00754	Ethotoin
DB00755	Tretinoin
DB00756	Hexachlorophene
DB00757	Dolasetron
DB00758	Clopidogrel
DB00759	Tetracycline
DB00760	Meropenem
DB00762	Irinotecan
DB00763	Methimazole
DB00764	Mometasone
DB00765	Metyrosine
DB00766	Clavulanate
DB00767	Benzquinamide
DB00768	Olopatadine
DB00769	Hydrocortamate
DB00770	Alprostadil
DB00771	Clidinium
DB00772	Malathion
DB00773	Etoposide
DB00774	Hydroflumethiazide
DB00775	Tirofiban
DB00776	Oxcarbazepine
DB00777	Propiomazine
DB00778	Roxithromycin
DB00779	Nalidixic Acid
DB00780	Phenelzine
DB00781	Polymyxin B Sulfate
DB00782	Propantheline
DB00783	Estradiol
DB00784	Mefenamic acid
DB00786	Marimastat
DB00787	Aciclovir
DB00788	Naproxen
DB00790	Perindopril
DB00791	Uracil mustard
DB00792	Tripelennamine
DB00793	Haloprogin
DB00794	Primidone
DB00795	Sulfasalazine
DB00796	Candesartan
DB00797	Tolazoline
DB00798	Gentamicin
DB00799	Tazarotene
DB00800	Fenoldopam
DB00801	Halazepam
DB00802	Alfentanil
DB00803	Colistin
DB00804	Dicyclomine
DB00805	Minaprine
DB00806	Pentoxifylline
DB00807	Proparacaine
DB00808	Indapamide
DB00809	Tropicamide
DB00810	Biperiden
DB00811	Ribavirin
DB00812	Phenylbutazone
DB00813	Fentanyl
DB00814	Meloxicam
DB00816	Orciprenaline
DB00817	Rosoxacin
DB00818	Propofol
DB00819	Acetazolamide
DB00820	Tadalafil
DB00821	Carprofen
DB00822	Disulfiram
DB00823	Ethynodiol Diacetate
DB00824	Enprofylline
DB00825	Menthol
DB00826	Natamycin
DB00827	Cinoxacin
DB00828	Fosfomycin
DB00829	Diazepam
DB00830	Phenmetrazine
DB00831	Trifluoperazine
DB00832	Phensuximide
DB00833	Cefaclor
DB00834	Mifepristone
DB00835	Brompheniramine
DB00836	Loperamide
DB00837	Progabide
DB00838	Clocortolone
DB00839	Tolazamide
DB00841	Dobutamine
DB00842	Oxazepam
DB00843	Donepezil
DB00844	Nalbuphine
DB00845	Clofazimine
DB00846	Flurandrenolide
DB00847	Cysteamine
DB00848	Levamisole
DB00849	Methylphenobarbital
DB00850	Perphenazine
DB00851	Dacarbazine
DB00852	Pseudoephedrine
DB00853	Temozolomide
DB00854	Levorphanol
DB00855	Aminolevulinic acid
DB00856	Chlorphenesin
DB00857	Terbinafine
DB00858	Dromostanolone
DB00859	Penicillamine
DB00860	Prednisolone
DB00861	Diflunisal
DB00862	Vardenafil
DB00863	Ranitidine
DB00864	Tacrolimus
DB00865	Benzphetamine
DB00866	Alprenolol
DB00867	Ritodrine
DB00868	Benzonatate
DB00869	Dorzolamide
DB00870	Suprofen
DB00871	Terbutaline
DB00872	Conivaptan
DB00873	Loteprednol
DB00874	Guaifenesin
DB00875	Flupenthixol
DB00876	Eprosartan
DB00877	Sirolimus
DB00878	Chlorhexidine
DB00879	Emtricitabine
DB00880	Chlorothiazide
DB00881	Quinapril
DB00882	Clomifene
DB00883	Isosorbide Dinitrate
DB00884	Risedronate
DB00885	Pemirolast
DB00887	Bumetanide
DB00888	Mechlorethamine
DB00889	Granisetron
DB00890	Dienestrol
DB00891	Sulfapyridine
DB00892	Oxybuprocaine
DB00894	Testolactone
DB00895	Benzylpenicilloyl Polylysine
DB00896	Rimexolone
DB00897	Triazolam
DB00898	Ethanol
DB00899	Remifentanil
DB00900	Didanosine
DB00901	Bitolterol
DB00902	Methdilazine
DB00903	Ethacrynic acid
DB00904	Ondansetron
DB00905	Bimatoprost
DB00906	Tiagabine
DB00907	Cocaine
DB00908	Quinidine
DB00909	Zonisamide
DB00910	Paricalcitol
DB00911	Tinidazole
DB00912	Repaglinide
DB00913	Anileridine
DB00914	Phenformin
DB00915	Amantadine
DB00916	Metronidazole
DB00917	Dinoprostone
DB00918	Almotriptan
DB00919	Spectinomycin
DB00920	Ketotifen
DB00921	Buprenorphine
DB00922	Levosimendan
DB00923	Ceforanide
DB00924	Cyclobenzaprine
DB00925	Phenoxybenzamine
DB00926	Etretinate
DB00927	Famotidine
DB00928	Azacitidine
DB00929	Misoprostol
DB00931	Methacycline
DB00932	Tipranavir
DB00933	Mesoridazine
DB00934	Maprotiline
DB00935	Oxymetazoline
DB00936	Salicyclic acid
DB00937	Diethylpropion
DB00938	Salmeterol
DB00939	Meclofenamic acid
DB00940	Methantheline
DB00942	Cycrimine
DB00943	Zalcitabine
DB00944	Demecarium
DB00945	Acetylsalicylic acid
DB00946	Phenprocoumon
DB00947	Fulvestrant
DB00948	Mezlocillin
DB00949	Felbamate
DB00950	Fexofenadine
DB00951	Isoniazid
DB00952	Naratriptan
DB00953	Rizatriptan
DB00954	Dirithromycin
DB00955	Netilmicin
DB00956	Hydrocodone
DB00957	Norgestimate
DB00959	Methylprednisolone
DB00960	Pindolol
DB00961	Mepivacaine
DB00962	Zaleplon
DB00963	Bromfenac
DB00964	Apraclonidine
DB00966	Telmisartan
DB00967	Desloratadine
DB00968	Methyldopa
DB00969	Alosetron
DB00970	Dactinomycin
DB00971	Selenium Sulfide
DB00972	Azelastine
DB00973	Ezetimibe
DB00974	Edetic Acid
DB00975	Dipyridamole
DB00976	Telithromycin
DB00977	Ethinyl Estradiol
DB00978	Lomefloxacin
DB00979	Cyclopentolate
DB00980	Ramelteon
DB00981	Physostigmine
DB00982	Isotretinoin
DB00983	Formoterol
DB00984	Nandrolone phenpropionate
DB00986	Glycopyrrolate
DB00987	Cytarabine
DB00988	Dopamine
DB00989	Rivastigmine
DB00990	Exemestane
DB00991	Oxaprozin
DB00992	Methyl aminolevulinate
DB00993	Azathioprine
DB00994	Neomycin
DB00995	Auranofin
DB00996	Gabapentin
DB00997	Doxorubicin
DB00998	Frovatriptan
DB00999	Hydrochlorothiazide
DB01000	Cyclacillin
DB01001	Salbutamol
DB01002	Levobupivacaine
DB01003	Cromoglicate
DB01004	Ganciclovir
DB01005	Hydroxyurea
DB01006	Letrozole
DB01007	Tioconazole
DB01008	Busulfan
DB01009	Ketoprofen
DB01010	Edrophonium
DB01011	Metyrapone
DB01012	Cinacalcet
DB01013	Clobetasol
DB01014	Balsalazide
DB01015	Sulfamethoxazole
DB01016	Glibenclamide
DB01017	Minocycline
DB01018	Guanfacine
DB01019	Bethanechol
DB01020	Isosorbide Mononitrate
DB01021	Trichlormethiazide
DB01022	Phytonadione
DB01023	Felodipine
DB01024	Mycophenolic acid
DB01025	Amlexanox
DB01026	Ketoconazole
DB01028	Methoxyflurane
DB01029	Irbesartan
DB01030	Topotecan
DB01031	Ethinamate
DB01032	Probenecid
DB01033	Mercaptopurine
DB01034	Cerulenin
DB01035	Procainamide
DB01036	Tolterodine
DB01037	Selegiline
DB01038	Carphenazine
DB01039	Fenofibrate
DB01041	Thalidomide
DB01042	Melphalan
DB01043	Memantine
DB01044	Gatifloxacin
DB01045	Rifampin
DB01046	Lubiprostone
DB01047	Fluocinonide
DB01048	Abacavir
DB01049	Ergoloid mesylate
DB01050	Ibuprofen
DB01051	Novobiocin
DB01053	Penicillin G
DB01054	Nitrendipine
DB01055	Mimosine
DB01056	Tocainide
DB01057	Echothiophate
DB01058	Praziquantel
DB01059	Norfloxacin
DB01060	Amoxicillin
DB01061	Azlocillin
DB01062	Oxybutynin
DB01063	Acetophenazine
DB01064	Isoproterenol
DB01065	Melatonin
DB01066	Cefditoren
DB01067	Glipizide
DB01068	Clonazepam
DB01069	Promethazine
DB01070	Dihydrotachysterol
DB01071	Mequitazine
DB01072	Atazanavir
DB01073	Fludarabine
DB01074	Perhexiline
DB01075	Diphenhydramine
DB01076	Atorvastatin
DB01077	Etidronic acid
DB01078	Deslanoside
DB01079	Tegaserod
DB01080	Vigabatrin
DB01081	Diphenoxylate
DB01082	Streptomycin
DB01083	Orlistat
DB01084	Emedastine
DB01085	Pilocarpine
DB01086	Benzocaine
DB01087	Primaquine
DB01088	Iloprost
DB01089	Deserpidine
DB01090	Pentolinium
DB01091	Butenafine
DB01092	Ouabain
DB01093	Dimethyl sulfoxide
DB01094	Hesperetin
DB01095	Fluvastatin
DB01096	Oxamniquine
DB01097	Leflunomide
DB01098	Rosuvastatin
DB01099	Flucytosine
DB01100	Pimozide
DB01101	Capecitabine
DB01102	Arbutamine
DB01103	Quinacrine
DB01104	Sertraline
DB01105	Sibutramine
DB01106	Levocabastine
DB01107	Methyprylon
DB01108	Trilostane
DB01110	Miconazole
DB01111	Colistimethate
DB01112	Cefuroxime
DB01113	Papaverine
DB01114	Chlorpheniramine
DB01115	Nifedipine
DB01116	Trimethaphan
DB01117	Atovaquone
DB01118	Amiodarone
DB01119	Diazoxide
DB01120	Gliclazide
DB01121	Phenacemide
DB01122	Ambenonium
DB01123	Proflavine
DB01124	Tolbutamide
DB01125	Anisindione
DB01126	Dutasteride
DB01127	Econazole
DB01128	Bicalutamide
DB01129	Rabeprazole
DB01130	Prednicarbate
DB01131	Proguanil
DB01132	Pioglitazone
DB01133	Tiludronate
DB01134	Desoxycorticosterone Pivalate
DB01135	Doxacurium chloride
DB01136	Carvedilol
DB01137	Levofloxacin
DB01138	Sulfinpyrazone
DB01139	Cephapirin
DB01140	Cefadroxil
DB01141	Micafungin
DB01142	Doxepin
DB01143	Amifostine
DB01144	Dichlorphenamide
DB01145	Sulfoxone
DB01146	Diphenylpyraline
DB01147	Cloxacillin
DB01148	Flavoxate
DB01149	Nefazodone
DB01150	Cefprozil
DB01151	Desipramine
DB01152	Candicidin
DB01153	Sertaconazole
DB01154	Thiamylal
DB01155	Gemifloxacin
DB01156	Bupropion
DB01157	Trimetrexate
DB01158	Bretylium
DB01159	Halothane
DB01161	Chloroprocaine
DB01162	Terazosin
DB01163	Amdinocillin
DB01165	Ofloxacin
DB01166	Cilostazol
DB01167	Itraconazole
DB01168	Procarbazine
DB01169	Arsenic trioxide
DB01170	Guanethidine
DB01171	Moclobemide
DB01172	Kanamycin
DB01173	Orphenadrine
DB01174	Phenobarbital
DB01175	Escitalopram
DB01176	Cyclizine
DB01177	Idarubicin
DB01178	Chlormezanone
DB01179	Podofilox
DB01180	Rescinnamine
DB01181	Ifosfamide
DB01182	Propafenone
DB01183	Naloxone
DB01184	Domperidone
DB01185	Fluoxymesterone
DB01186	Pergolide
DB01187	Iophendylate
DB01188	Ciclopirox
DB01189	Desflurane
DB01190	Clindamycin
DB01191	Dexfenfluramine
DB01192	Oxymorphone
DB01193	Acebutolol
DB01194	Brinzolamide
DB01195	Flecainide
DB01196	Estramustine
DB01197	Captopril
DB01198	Zopiclone
DB01199	Tubocurarine
DB01200	Bromocriptine
DB01201	Rifapentine
DB01202	Levetiracetam
DB01203	Nadolol
DB01204	Mitoxantrone
DB01205	Flumazenil
DB01206	Lomustine
DB01207	Ridogrel
DB01208	Sparfloxacin
DB01209	Dezocine
DB01210	Levobunolol
DB01211	Clarithromycin
DB01212	Ceftriaxone
DB01213	Fomepizole
DB01214	Metipranolol
DB01215	Estazolam
DB01216	Finasteride
DB01217	Anastrozole
DB01218	Halofantrine
DB01219	Dantrolene
DB01220	Rifaximin
DB01221	Ketamine
DB01222	Budesonide
DB01224	Quetiapine
DB01225	Enoxaparin
DB01226	Mivacurium
DB01227	Levomethadyl Acetate
DB01228	Encainide
DB01229	Paclitaxel
DB01230	Pemoline
DB01231	Diphenidol
DB01232	Saquinavir
DB01233	Metoclopramide
DB01234	Dexamethasone
DB01235	Levodopa
DB01236	Sevoflurane
DB01237	Bromodiphenhydramine
DB01238	Aripiprazole
DB01239	Chlorprothixene
DB01240	Epoprostenol
DB01241	Gemfibrozil
DB01242	Clomipramine
DB01243	Chloroxine
DB01244	Bepridil
DB01245	Decamethonium
DB01246	Trimeprazine
DB01247	Isocarboxazid
DB01248	Docetaxel
DB01249	Iodixanol
DB01250	Olsalazine
DB01251	Gliquidone
DB01252	Mitiglinide
DB01253	Ergonovine
DB01254	Dasatinib
DB01255	Lisdexamfetamine
DB01256	Retapamulin
DB01258	Aliskiren
DB01259	Lapatinib
DB01260	Desonide
DB01261	Sitagliptin
DB01262	Decitabine
DB01263	Posaconazole
DB01264	Darunavir
DB01265	Telbivudine
DB01267	Paliperidone
DB01268	Sunitinib
DB01273	Varenicline
DB01274	Arformoterol
DB01275	Hydralazine
DB01280	Nelarabine
DB01282	Carbetocin
DB01283	Lumiracoxib
DB01288	Fenoterol
DB01289	Glisoxepide
DB01291	Pirbuterol
DB01294	Bismuth Subsalicylate
DB01295	Bevantolol
DB01296	Glucosamine
DB01297	Practolol
DB01298	Sulfacytine
DB01299	Sulfadoxine
DB01301	Rolitetracycline
DB01319	Fosamprenavir
DB01320	Fosphenytoin
DB01321	Josamycin
DB01322	Kava
DB01324	Polythiazide
DB01325	Quinethazone
DB01326	Cefamandole
DB01327	Cefazolin
DB01328	Cefonicid
DB01329	Cefoperazone
DB01330	Cefotetan
DB01331	Cefoxitin
DB01332	Ceftizoxime
DB01333	Cefradine
DB01334	Doxacurium
DB01336	Metocurine
DB01337	Pancuronium
DB01338	Pipecuronium
DB01339	Vecuronium
DB01340	Cilazapril
DB01342	Forasartan
DB01347	Saprisartan
DB01348	Spirapril
DB01349	Tasosartan
DB01351	Amobarbital
DB01352	Aprobarbital
DB01353	Butethal
DB01354	Heptabarbital
DB01355	Hexobarbital
DB01357	Mestranol
DB01359	Penbutolol
DB01361	Troleandomycin
DB01362	Iohexol
DB01364	Ephedrine
DB01365	Mephentermine
DB01366	Procaterol
DB01367	Rasagiline
DB01369	Quinupristin
DB01380	Cortisone acetate
DB01382	Glycodiazine
DB01384	Paramethasone
DB01388	Mibefradil
DB01392	Yohimbine
DB01393	Bezafibrate
DB01394	Colchicine
DB01395	Drospirenone
DB01396	Digitoxin
DB01399	Salsalate
DB01400	Neostigmine
DB01403	Methotrimeprazine
DB01405	Temafloxacin
DB01406	Danazol
DB01407	Clenbuterol
DB01408	Bambuterol
DB01409	Tiotropium
DB01410	Ciclesonide
DB01411	Pranlukast
DB01412	Theobromine
DB01413	Cefepime
DB01414	Cefacetrile
DB01415	Ceftibuten
DB01416	Cefpodoxime
DB01418	Acenocoumarol
DB01419	Antrafenine
DB01420	Testosterone Propionate
DB01421	Paromomycin
DB01422	Nitroxoline
DB01423	Stepronin
DB01424	Aminophenazone
DB01425	Alizapride
DB01426	Ajmaline
DB01427	Amrinone
DB01428	Oxybenzone
DB01429	Aprindine
DB01430	Almitrine
DB01431	Allylestrenol
DB01433	Methadyl Acetate
DB01434	19-norandrostenedione
DB01435	Antipyrine
DB01436	Alfacalcidol
DB01437	Glutethimide
DB01438	Phenazopyridine
DB01439	3-Methylthiofentanyl
DB01440	Gamma Hydroxybutyric Acid
DB01441	5-Methoxy-N,N-diisopropyltryptamine
DB01442	MMDA
DB01444	Dimethylthiambutene
DB01445	Bufotenine
DB01446	Alpha-methyltryptamine
DB01447	4-Methylaminorex
DB01450	Dihydroetorphine
DB01452	Heroin
DB01453	Beta-hydroxyfentanyl
DB01454	3,4-Methylenedioxymethamphetamine
DB01459	Bezitramide
DB01460	Diethyltryptamine
DB01461	Dimenoxadol
DB01462	Etonitazene
DB01463	Fencamfamine
DB01464	Furethidine
DB01465	2,5-Dimethoxyamphetamine
DB01466	Ethylmorphine
DB01467	2,5-Dimethoxy-4-ethylamphetamine
DB01468	Ethylmethylthiambutene
DB01469	Acetorphine
DB01470	Alpha-methylthiofentanyl
DB01471	Bolasterone
DB01472	4-Methoxyamphetamine
DB01473	Betaprodine
DB01475	Dioxaphetyl butyrate
DB01476	Haloxazolam
DB01478	1-Methyl-4-phenyl-4-propionoxypiperidine
DB01480	Cyprenorphine
DB01481	Delta1-dihydrotestosterone
DB01483	Barbital
DB01484	4-Bromo-2,5-dimethoxyamphetamine
DB01486	Cathine
DB01487	Embutramide
DB01488	Dimethyltryptamine
DB01489	Camazepam
DB01490	Aminorex
DB01491	Dipipanone
DB01493	Ethylestrenol
DB01496	Barbituric acid derivative
DB01497	Etorphine
DB01498	Alphamethadol
DB01499	Alphameprodine
DB01500	4-Hydroxy-19-nortestosterone
DB01501	Difenoxin
DB01502	Diampromide
DB01505	Etoxeridine
DB01506	1-Phenylcyclohexylamine
DB01507	3Beta,17beta-dihydroxy-5alpha-androstane
DB01509	3,4-Methylenedioxyamphetamine
DB01511	Delorazepam
DB01512	Hydromorphinol
DB01514	Furazabol
DB01515	Benzoylecgonine
DB01516	3,4,5-Trimethoxyamphetamine
DB01518	Benzethidine
DB01520	Tenocyclidine
DB01521	Clostebol
DB01522	Betacetylmethadol
DB01523	Clonitazene
DB01524	5-Androstenediol
DB01525	Ecgonine
DB01526	4-Androstenediol
DB01527	Clortermine
DB01528	4-Methyl-2,5-dimethoxyamphetamine
DB01529	Dextromoramide
DB01530	3Alpha,17beta-dihydroxy-5alpha-androstane
DB01531	Desomorphine
DB01532	Acetyl-alpha-methylfentanyl
DB01533	Diethylthiambutene
DB01534	Chlorhexadol
DB01535	Carfentanil
DB01536	4-Androstenedione
DB01537	4-Bromo-2,5-dimethoxyphenethylamine
DB01538	Acetyldihydrocodeine
DB01539	1-Piperidinocyclohexanecarbonitrile
DB01541	Boldenone
DB01542	Allylprodine
DB01544	Flunitrazepam
DB01545	Ethyl loflazepate
DB01546	Alpha-ethyltryptamine
DB01547	Drotebanol
DB01548	Diprenorphine
DB01549	Rolicyclidine
DB01550	Fenproporex
DB01551	Dihydrocodeine
DB01552	Betameprodine
DB01553	Cloxazolam
DB01555	Alphacetylmethadol
DB01556	Chlorphentermine
DB01557	Alpha-methylfentanyl
DB01558	Bromazepam
DB01559	Clotiazepam
DB01560	Cathinone
DB01561	Androstanedione
DB01562	1-(2-Phenylethyl)-4-phenyl-4-acetoxypiperidine
DB01563	Chloral hydrate
DB01564	Calusterone
DB01565	Dihydromorphine
DB01566	3,4-Methylenedioxy-N-ethylamphetamine
DB01567	Fludiazepam
DB01568	Codeine-N-oxide
DB01569	Formebolone
DB01570	Beta-hydroxy-3-methylfentanyl
DB01571	3-Methylfentanyl
DB01573	Benzylmorphine
DB01576	Dextroamphetamine
DB01577	Methamphetamine
DB01578	Metrizamide
DB01579	Phendimetrazine
DB01580	Oxprenolol
DB01581	Sulfamerazine
DB01582	Sulfamethazine
DB01586	Ursodeoxycholic acid
DB01587	Ketazolam
DB01588	Prazepam
DB01589	Quazepam
DB01590	Everolimus
DB01594	Cinolazepam
DB01595	Nitrazepam
DB01597	Cilastatin
DB01598	Imipenem
DB01599	Probucol
DB01600	Tiaprofenic acid
DB01601	Lopinavir
DB01602	Bacampicillin
DB01603	Meticillin
DB01604	Pivampicillin
DB01605	Pivmecillinam
DB01606	Tazobactam
DB01607	Ticarcillin
DB01608	Propericiazine
DB01609	Deferasirox
DB01610	Valganciclovir
DB01611	Hydroxychloroquine
DB01612	Amyl Nitrite
DB01613	Erythrityl Tetranitrate
DB01614	Acepromazine
DB01615	Aceprometazine
DB01616	Alverine
DB01618	Molindone
DB01619	Phenindamine
DB01620	Pheniramine
DB01621	Pipotiazine
DB01622	Thioproperazine
DB01623	Thiothixene
DB01624	Zuclopenthixol
DB01625	Isopropamide
DB01626	Pargyline
DB01627	Lincomycin
DB01628	Etoricoxib
DB01629	5-Fluorouridine
DB01630	SC-74020
DB01631	Methyl Nonanoate (Ester)
DB01632	Alpha-Phosphoribosylpyrophosphoric Acid
DB01633	Deoxy-2-Fluoro-B-D-Cellotrioside
DB01634	2-Oxy-4-Hydroxy-5-(2-Hydrazinopyridine)Phenylalanine
DB01635	2,2-Dimethylthiazolidine-4-Carboxylic Acid;(Dmt)Thiazolidine
DB01637	3,7,11,15-Tetramethyl-Hexadecan-1-Ol
DB01638	D-Sorbitol
DB01639	N-Methyl-Pyridoxal-5'-Phosphate
DB01640	(5r)-6-(4-{[2-(3-Iodobenzyl)-3-Oxocyclohex-1-En-1-Yl]Amino}Phenyl)-5-Methyl-4,5-Dihydropyridazin-3(2h)-One
DB01641	(5z)-2-[(1s,2r)-1-Amino-2-Hydroxypropyl]-5-[(4-Amino-1h-Indol-3-Yl)Methylene]-3-(2-Hydroxyethyl)-3,5-Dihydro-4h-Imidazol-4-One
DB01642	O1-Methyl-Glucose
DB01643	Thymidine-5'-Phosphate
DB01644	3,6-Dihydroxy-Xanthene-9-Propionic Acid
DB01645	Genistein
DB01646	N-Acetylmethionine
DB01647	(R)-Mesopram
DB01648	O1-Methyl-4-Deoxy-4-Thio-Beta-D-Glucose
DB01649	7-Methyl-Gpppa
DB01650	trans-2-hydroxycinnamic acid
DB01651	Methyl 4,6-O-[(1r)-1-Carboxyethylidene]-Beta-D-Galactopyranoside
DB01652	4-Hydroxybenzoyl Coenzyme A
DB01653	(5z)-5-(1h-Indol-3-Ylmethylene)-4h-Imidazol-4-One
DB01654	Thiorphan
DB01655	L-Guluronic Acid 6-Phosphate
DB01657	2-Amino-3-[4-Hydroxy-6-Oxo-3-(2-Phenyl-Cyclopropylimino)-Cyclohexa-1,4-Dienyl]-Propionic Acid
DB01658	1'-Deazo-Thiamin Diphosphate
DB01659	3-(1,10-Phenanthrol-2-Yl)-L-Alanine
DB01660	Adenosine-5'-Diphosphate Monothiophosphate
DB01661	Phosphoribosyl Atp
DB01662	Trans-O-Hydroxy-Alpha-Methyl Cinnamate
DB01664	(S)-Des-Me-Ampa
DB01665	ZK-800270
DB01666	D-Myo-Inositol-Hexasulphate
DB01667	8-Azaguanine
DB01668	Nanaomycin D
DB01669	Virginiamycin M1
DB01670	Propyl Acetate
DB01671	4-(Hydroxymercury)Benzoic Acid
DB01672	2,3-Dihydroxy-Benzoic Acid
DB01673	Uridine-5'-Diphosphate-N-Acetylmuramoyl-L-Alanine
DB01674	[2-(1-Amino-2-Hydroxy-Propyl)-4-(4-Fluoro-1h-Indol-3-Ylmethyl)-5-Hydroxy-Imidazol-1-Yl]-Acetic Acid
DB01675	Methacrylyl-Coenzyme A
DB01676	Trinitrotoluene
DB01677	Fumarate
DB01678	RU84687
DB01679	Propyl Trihydrogen Diphosphate
DB01681	Benzene Hexacarboxylic Acid
DB01682	6'-Methyl-Thiamin Diphosphate
DB01683	Chymostatin
DB01684	1-Hydroxy-1-Thio-Glycerol
DB01685	4-[5-Pyridin-4-Yl-1h-[1,2,4]Triazol-3-Yl]-Pyridine-2-Carbonitrile
DB01686	N,N-dimethylarginine
DB01687	Mannobiose
DB01688	P-Cresol
DB01689	Inhibitor Idd 384
DB01690	Bis(Adenosine)-5'-Triphosphate
DB01691	Indole Naphthyridinone
DB01692	Dithioerythritol
DB01693	Ribavirin Monophosphate
DB01694	D-tartaric acid
DB01695	N-Hydroxy-4-Phosphono-Butanamide
DB01696	7,9-Dihydro-1h-Purine-2,6,8(3h)-Trione
DB01697	Cellotriose
DB01698	Rutin
DB01699	(4e)-4-Aminohex-4-Enoic Acid
DB01700	Aicar
DB01701	1,2-Dichloro-Propane
DB01702	2-(3,4-Dihydroxyphenyl)Acetic Acid
DB01703	N-(2-Ferrocenylethyl)Maleimide
DB01704	2,4-Dihydroxy-Trans Cinnamic Acid
DB01705	Bis(5-Amidino-Benzimidazolyl)Methane
DB01706	2-Bromo-6-Chloro-Purine
DB01707	L-Alfa-Lysophosphatidylcholine, Lauroyl
DB01708	3-Beta-Hydroxy-5-Androsten-17-One
DB01709	2-Phosphoglyceric Acid
DB01710	Porphyrin Fe(Iii)
DB01711	2,3,4,5,6-Pentafluorobenzyl Alcohol
DB01712	(3r)-4-(P-Toluenesulfonyl)-1,4-Thiazane-3-Carboxylicacid-L-Phenylalanine Ethyl Ester
DB01713	Udp-Alpha-D-Xylopyranose
DB01714	N-Methyl-Lysine
DB01715	7,8-Diamino-Nonanoic Acid
DB01716	2-Propenyl-N-Acetyl-Neuramic Acid
DB01717	Bis(Adenosine)-5'-Pentaphosphate
DB01718	Cetyl-Trimethyl-Ammonium
DB01719	Thio-Maltopentaose
DB01720	(2z)-2-(Benzoylamino)-3-[4-(2-Bromophenoxy)Phenyl]-2-Propenoic Acid
DB01721	Analogue of Indinavir Drug
DB01722	Ethylbenzene
DB01723	{3-[3-(3,4-Dimethoxy-Phenyl)-1-(1-{1-[2-(3,4,5-Trimethoxy-Phenyl)-Butyryl]-Piperidin-2yl}-Vinyloxy)-Propyl]-Phenoxy}-Acetic Acid
DB01724	Reduced Threonine
DB01725	CRA_7806
DB01726	2-Aminophenol
DB01727	Isocitric Acid
DB01728	3-[Aminoethylphosphoryl]-[1,2-Di-Palmitoyl]-Sn-Glycerol
DB01729	(1s,3s,4s)-1,3,4-Triphospho-Myo-Inositol
DB01730	9-(4-Hydroxy-3-(Hydroxymethyl)but-1-Yl)Guanine
DB01731	(S)-Wiskostatin
DB01732	(4r,5s,6s,7r)-1,3-Dibenzyl-4,7-Bis(Phenoxymethyl)-5,6-Dihydroxy-1,3 Diazepan-2-One
DB01733	L-Phospholactate
DB01734	3-(Oxalyl-Amino)-Naphthalene-2-Carboxylic Acid
DB01735	3-Chloroalaninate
DB01736	[3-(Dodecanoylamino)Propyl](Hydroxy)Dimethylammonium
DB01737	Nalpha-(2-Naphthylsulfonylglycyl)-3-Amidino-D,L-Phenylalanine-Isopropylester
DB01738	O-Phosphoethanolamine
DB01739	Allo-Isoleucine
DB01740	2-Amino-4-Butyl-5-Propylselenazole
DB01741	CRA_17693
DB01742	(3r)-1-Acetyl-3-Methylpiperidine
DB01743	Pyoverdine-Chromophore
DB01744	Camphor
DB01745	N-Alpha-(2-Naphthylsulfonyl)-N(3-Amidino-L-Phenylalaninyl)Isopipecolinic Acid Methyl Ester
DB01746	D-Leucine
DB01747	Coprogen
DB01748	N-Benzyl-4-Sulfamoyl-Benzamide
DB01749	1,2-Dimethoxyethane
DB01750	Naphthalen-1-Yl-Acetic Acid
DB01751	3,3',5,5'-Tetraiodothyroacetic Acid
DB01752	S-Adenosyl-L-Homocysteine
DB01753	4-Oxo-Nicotinamide-Adenine Dinucleotide Phosphate
DB01754	3,4-Dihydroxy-1-Methylquinolin-2(1h)-One
DB01755	N-[Isoleucinyl]-N'-[Adenosyl]-Diaminosufone
DB01756	D-4-Phosphoerythronic Acid
DB01758	3-Iodo-Tyrosine
DB01759	5-Hydroxy-2-(Hydroxymethyl)-4h-Pyran-4-One
DB01760	2-Methoxy-3-Isopropylpyrazine
DB01761	4-[5-[2-(1-Phenyl-Ethylamino)-Pyrimidin-4-Yl]-1-Methyl-4-(3-Trifluoromethylphenyl)-1h-Imidazol-2-Yl]-Piperidine
DB01762	Acetoacetic Acid
DB01763	Tatp
DB01764	Dalfopristin
DB01765	(5-Oxo-5,6-Dihydro-Indolo[1,2-a]Quinazolin-7-Yl)-Acetic Acid
DB01766	Beta-(2-Naphthyl)-Alanine
DB01767	Hemi-Babim
DB01768	Methylumbelliferyl Sialic Acid
DB01769	Double Oxidized Cysteine
DB01770	All-Trans Axerophthene
DB01771	CRA_10991
DB01772	3-[3-(2,3-Dihydroxy-Propylamino)-Phenyl]-4-(5-Fluoro-1-Methyl-1h-Indol-3-Yl)-Pyrrole-2,5-Dione
DB01773	4-[3-Carboxymethyl-3-(4-Phosphonooxy-Benzyl)-Ureido]-4-[(3-Cyclohexyl-Propyl)-Methyl-Carbamoyl]Butyric Acid
DB01774	Adenosine-5'-Monophosphate Glucopyranosyl-Monophosphate Ester
DB01775	Dihydroxyacetone
DB01776	M-Cresol
DB01777	Coa-S-Trimethylene-Acetyl-Tryptamine
DB01778	8-Amino-1,3-Dimethyl-3,7-Dihydropurine-2,6-Dione
DB01779	Glycerol-2-Phosphate
DB01780	Fusicoccin
DB01782	2,6-Dihydroanthra/1,9-Cd/Pyrazol-6-One
DB01783	N-[(2r)-2,4-Dihydroxy-3,3-Dimethylbutanoyl]-Beta-Alanine
DB01784	4-Flourobenzenesulfonamide
DB01785	Dimethylallyl Diphosphate
DB01786	D-Alanine
DB01788	4-Imino-5-Methidyl-2-Methylpyrimidine
DB01789	1-Amino-2,3-Dihydroxy-5-Hydroxymethyl Cyclohex-5-Ene
DB01790	Sp-Adenosine-3',5'-Cyclic-Monophosphorothioate
DB01791	Piclamilast
DB01792	Adenylyl-3'-5'-Phospho-Uridine-3'-Monophosphate
DB01793	I-5
DB01795	Phenyl Boronic Acid
DB01796	Quinolinic Acid
DB01797	(2r)-2-(Aminomethyl)-2,4-Dihydroxy-5-Oxo-3-(2-Oxoethyl)-2,5-Dihydro-1h-Imidazol-3-Ium
DB01798	Ethyl Dihydrogen Diphosphate
DB01799	4-Hydroxy-3-Methyl Butyl Diphosphate
DB01800	N,4-Dihydroxy-N-Oxo-3-(Sulfooxy)Benzenaminium
DB01802	(4r)-7aza-7,8-Dihydrolimonene
DB01803	2-(Trimethylammonium)Ethyl Thiol
DB01804	2-Ammoniobut-3-Enoate, 2-Amino-3-Butenoate
DB01805	Monoisopropylphosphorylserine
DB01806	10-{4-Dimethylamino-5-[4-Hydroxy-6-Methyl-5-(6-Methyl-5-Oxo-Tetrahydro-Pyran-2-Yloxy)-Tetrahydro-Pyrane-2-Yloxy]-6-Methyl-Tetrahydro-Pyran-2-Yloxy}-8-Ethyl-1,8,11-Trihydroxy-7,8,9,10-Tetrahydro-Naphthacene-5,12-Dione
DB01807	N-[(3z)-5-Tert-Butyl-2-Phenyl-1,2-Dihydro-3h-Pyrazol-3-Ylidene]-N'-(4-Chlorophenyl)Urea
DB01808	Thiarsahydroxy-Cysteine
DB01809	1-Ter-Butyl-3-P-Tolyl-1h-Pyrazolo[3,4-D]Pyrimidin-4-Ylamine
DB01810	[1-(1-Methyl-4,5-Dioxo-Pent-2-Enylcarbamoyl)-2-Phenyl-Ethyl]-Carbamic Acid Benzyl Ester
DB01811	3h-Indole-5,6-Diol
DB01812	Adenosine-3'-5'-Diphosphate
DB01813	Pyridoxyl-Glutamic Acid-5'-Monophosphate
DB01814	2-Tridecanoyloxy-Pentadecanoic Acid
DB01815	Nz-(Dicarboxymethyl)Lysine
DB01816	(1s,6s,7r,8r,8ar)-1,6,7,8-Tetrahydroxyindolizidine
DB01817	Threonine-Aspartic Ester
DB01818	O3-Sulfonylgalactose
DB01819	Phosphoenolpyruvate
DB01820	Compound 12, N-Acetyl-4-[(Carboxycarbonyl)(2-Carboxyphenyl)Amino]-N-Pentyl-1-Napthylalaniamide
DB01821	L-N(Omega)-Nitroarginine-2,4-L-Diaminobutyric Amide
DB01822	Dithiane Diol
DB01823	Beta-D-Glucopyranose Spirohydantoin
DB01824	(3s)-Tetrahydrofuran-3-Yl (1r,2s)-3-[4-((1r)-2-{[(S)-Amino(Hydroxy)Methyl]Oxy}-2,3-Dihydro-1h-Inden-1-Yl)-2-Benzyl-3-Oxopyrrolidin-2-Yl]-1-Benzyl-2-Hydroxypropylcarbamate
DB01825	2-Amino-8-Methylquinazolin-4(3h)-One
DB01826	N-Butyl Isocyanide
DB01827	2,3,5,6-Tetrafluoro-4-Methoxy-Benzamide
DB01828	Methylamine
DB01829	Desulfo-Coenzyme A
DB01830	{4-[2-Acetylamino-2-(3-Carbamoyl-2-Cyclohexylmethoxy-6,7,8,9-Tetrahydro-5h-Benzocyclohepten-5ylcarbamoyl)-Ethyl]-2-Phosphono-Phenyl}-Phosphonic Acid
DB01831	Tryptophanyl-5'amp
DB01832	4-[Hydroxy-[Methyl-Phosphinoyl]]-3-Oxo-Butanoic Acid
DB01833	L-2-Amino-4-(Guanidinooxy)Butyric Acid
DB01834	(9r,10r)-9-(S-Glutathionyl)-10-Hydroxy-9,10-Dihydrophenanthrene
DB01835	4r-Fluoro-N6-Ethanimidoyl-L-Lysine
DB01836	[4-(6-Chloro-Naphthalene-2-Sulfonyl)-Piperazin-1-Yl]-(3,4,5,6-Tetrahydro-2h-[1,4']Bipyridinyl-4-Yl)-Methanone
DB01837	O-Acetylserine
DB01838	6,4'-Dihydroxy-3-Methyl-3',5'-Dibromoflavone
DB01839	1,2-Propanediol
DB01840	2-Deoxy-D-Glucitol 6-(E)-Vinylhomophosphonate
DB01841	4,6-Dideoxyglucose
DB01842	3'-Phosphate-Adenosine-5'-Diphosphate
DB01843	3-Amino-8,9,10-Trihydroxy-7-Hydroxymethyl-6-Oxa-1,3-Diaza-Spiro[4.5]Decane-2,4-Dione
DB01844	Dimethylformamide
DB01845	N-Butylbenzene
DB01846	Oxidized Coenzyme A
DB01847	N-Carbamyl-D-Valine
DB01849	3,4-Dihydrouracil
DB01850	(2s,3s,8s,9s)-3-Amino-9-Methoxy-2,6,8-Trimethyl-10-Phenyldeca-4,6-Dienoic Acid
DB01851	Tetrabutylammonium Ion
DB01852	Kaempherol
DB01854	5-Bromonicotinamide
DB01855	5-(Hydroxy-Methyl-Amino)-3-Methyl-Pyrrolidine-2-Carboxylic Acid
DB01856	Pimelic Acid
DB01857	Phosphoaspartate
DB01858	[1-(4-Fluorobenzyl)Cyclobutyl]Methyl (1s)-1-[Oxo(1h-Pyrazol-5-Ylamino)Acetyl]Pentylcarbamate
DB01859	4-Diphosphocytidyl-2-C-Methyl-D-Erythritol 2-Phosphate
DB01860	Cordycepin Triphosphate
DB01861	Glucose-Uridine-C1,5'-Diphosphate
DB01862	1-(Isopropylthio)-Beta-Galactopyranside
DB01863	Inositol 1,3,4,5-Tetrakisphosphate
DB01864	5'-Guanosine-Diphosphate-Monothiophosphate
DB01865	3-(6-Aminopyridin-3-Yl)-N-Methyl-N-[(1-Methyl-1h-Indol-2-Yl)Methyl]Acrylamide
DB01866	RU79256
DB01868	Glycyl-L-a-Aminopimelyl-E-(D-2-Aminoethyl)Phosphonate
DB01869	Rhamnose
DB01870	1,4-Dithio-Alpha-D-Mannose
DB01871	[1-(1-Benzyl-3-Hydroxy-2-Oxo-Propylcarbamoyl)-2-Phenyl-Ethyl]-Carbamic Acid Benzyl Ester
DB01872	Acetylgalactosamine-4-Sulfate
DB01873	Epothilone D
DB01874	Tropinone
DB01875	8-Azaxanthine
DB01876	Bis(5-Amidino-2-Benzimidazolyl)Methanone
DB01877	N-Hydroxy 1n(4-Methoxyphenyl)Sulfonyl-4-(Z,E-N-Methoxyimino)Pyrrolidine-2r-Carboxamide
DB01878	Benzophenone
DB01879	(S)-2-{Methyl-[2-(Naphthalene-2-Sulfonylamino)-5-(Naphthalene-2-Sulfonyloxy)-Benzoyl]-Amino}-Succinicacid
DB01880	3,4-Dihydroxycinnamic Acid
DB01881	2-Methylpentane-1,2,4-Triol
DB01882	(2s)-2-Amino-4-(Methylsulfanyl)-1-Pyridin-2-Ylbutane-1,1-Diol
DB01883	N-(Sulfanylacetyl)Tyrosylprolylmethioninamide
DB01884	2-Amino-3-Methyl-1-Pyrrolidin-1-Yl-Butan-1-One
DB01885	D-Galctopyranosyl-1-On
DB01887	Inhibitor BEA369
DB01888	4-[5-(Trans-4-Aminocyclohexylamino)-3-Isopropylpyrazolo[1,5-a]Pyrimidin-7-Ylamino]-N,N-Dimethylbenzenesulfonamide
DB01889	16,17-Androstene-3-Ol
DB01890	Deoxy-Bigchap
DB01891	Tl-3-093
DB01892	Hyperforin
DB01893	N6-Benzyl Adenosine-5'-Diphosphate
DB01894	5-N-Acetyl-Alpha-D-Neuraminic Acid
DB01895	Aspartyl-Adenosine-5'-Monophosphate
DB01896	M-Aminophenylboronic Acid
DB01897	2-(2f-Benzothiazolyl)-5-Styryl-3-(4f-Phthalhydrazidyl)Tetrazolium Chloride
DB01898	2s,3r-2-Amino-3-Methylpentanedioic Acid
DB01899	Nd1-Phosphonohistidine
DB01900	Toluene
DB01901	Sucrose Octasulfate
DB01902	1-Ethyl-Pyrrolidine-2,5-Dione
DB01903	5-Bromo-2'-Deoxyuridine-5'-Monophosphate
DB01904	D-Xylitol
DB01905	2-(2-Hydroxy-5-Methoxy-Phenyl)-1h-Benzoimidazole-5-Carboxamidine
DB01906	3-(5-Amino-7-Hydroxy-[1,2,3]Triazolo[4,5-D]Pyrimidin-2-Yl)-Benzoic Acid
DB01907	Nicotinamide-Adenine-Dinucleotide
DB01908	RU85493
DB01909	Alpha-Cyclodextrin (Cyclohexa-Amylose)
DB01910	Adenosyl-Ornithine
DB01911	N-Methylmesoporphyrin
DB01912	2,2':6',2''-Terpyridine Platinum(Ii)
DB01913	Lipid Fragment
DB01914	D-Glucose in Linear Form
DB01915	S-Hydroxycysteine
DB01917	Putrescine
DB01918	[Methyltelluro]Acetate
DB01919	Pentanal
DB01920	1-O-[O-Nitrophenyl]-Beta-D-Galactopyranose
DB01921	Xylose-Derived Lactam Oxime
DB01922	Maltosyl-Alpha (1,4)-D-Gluconhydroximo-1,5-Lactam
DB01923	L-Xylulose 5-Phosphate
DB01924	Benzhydroxamic Acid
DB01925	2'-Chloro-Biphenyl-2,3-Diol
DB01926	Carboxymycobactin S
DB01927	Duroquinone
DB01928	Huperaine A
DB01929	5-Chloryl-2,4,6-Quinazolinetriamine
DB01930	2,4-Dihydroxy-3,3-Dimethyl-Butyrate
DB01931	Dcka, 5,7-Dichlorokynurenic Acid
DB01933	7-Hydroxystaurosporine
DB01934	N-Methyl-N-(10-Methylundecanoyl)-D-Seryl-L-Alanyl-N~1~-[(7s,10s,13s)-13-Carboxy-3,18-Dihydroxy-10-Methyl-8,11-Dioxo-9,12-Diazatricyclo[13.3.1.1~2,6~]Icosa-1(19),2(20),3,5,15,17-Hexaen-7-Yl]-N~1~-Methylglycinamide
DB01935	3-{[(1r)-1-Benzyl-2-Sulfanylethyl]Amino}-3-Oxopropanoic Acid
DB01936	Ribose
DB01937	Guanosine-2'-Monophosphate
DB01938	L-Histidine Beta Naphthylamide
DB01939	5-Amidino-Benzimidazole
DB01940	Balanol Analog 2
DB01941	6-[1-(3,5,5,8,8-Pentamethyl-5,6,7,8-Tetrahydronaphthalen-2-Yl)Cyclopropyl]Pyridine-3-Carboxylic Acid
DB01942	Formic Acid
DB01943	Compound 15
DB01944	(S)-blebbistatin
DB01945	4-Carbamoyl-1-Beta-D-Ribofuranosyl-Imidazolium-5-Olate-5'-Phosphate
DB01946	3-[1-(3-Aminopropyl)-1h-Indol-3-Yl]-4-(1-Methyl-1h-Indol-3-Yl)-1h-Pyrrole-2,5-Dione
DB01947	RU78262
DB01948	1-(2,6-Dichlorophenyl)-5-(2,4-Difluorophenyl)-7-Piperidin-4-Yl-3,4-Dihydroquinolin-2(1h)-One
DB01949	2-Amino-N,3,3-Trimethylbutanamide
DB01950	N-(4-Methoxybenzyl)-N'-(5-Nitro-1,3-Thiazol-2-Yl)Urea
DB01951	Gpi-1046
DB01952	1,N6-Ethenoadenine
DB01953	Inhibitor of P38 Kinase
DB01954	4-[3-(Cyclopentyloxy)-4-Methoxyphenyl]-2-Pyrrolidinone
DB01955	1,4-Butanediol
DB01956	2-Aminoethanesulfonic Acid
DB01957	3-Chlorophenol
DB01958	5-[4-Tert-Butylphenylsulfanyl]-2,4-Quinazolinediamine
DB01959	3,5-Dimethyl-1-(3-Nitrophenyl)-1h-Pyrazole-4-Carboxylic Acid Ethyl Ester
DB01960	7n-Methyl-8-Hydroguanosine-5'-Diphosphate
DB01961	Cytidine-3'-Monophosphate
DB01962	Phosphonotyrosine
DB01963	Phenylethane Boronic Acid
DB01964	AL5424
DB01965	2'-Deoxyuridine 5'-Alpha,Beta-Imido-Triphosphate
DB01966	Di-Stearoyl-3-Sn-Phosphatidylethanolamine
DB01967	N-{3-[(7ar,12as,12bs)-7-Oxo-1,3,4,6,7,7a,12a,12b-Octahydroindolo[2,3-a]Quinolizin-12(2h)-Yl]Propyl}Propane-2-Sulfonamide
DB01968	2-Thioethenamine
DB01969	Trifluoroacetonyl Coenzyme A
DB01970	Hg9a-9, Nonanoyl-N-Hydroxyethylglucamide
DB01971	(2e)-3-(1h-Imidazol-4-Yl)Acrylic Acid
DB01972	Guanosine-5'-Monophosphate
DB01973	O-Benzylsulfonyl-Serine
DB01974	2-Amino-3-[5-(Amino-Carboxy-Methyl)-2,3-Dihydro-Isoxazol-3-Ylsulfanyl]-Propionic Acid
DB01975	AMPCPR
DB01976	Aminoanthracene
DB01977	6-(N-Phenylcarbamyl)-2-Naphthalenecarboxamidine
DB01978	7,9-Dimethylguanine
DB01979	O1-Methyl-Mannose
DB01980	Para-Iodo-D-Phenylalanine Hydroxamic Acid
DB01981	3,6-Anhydro-D-Galactose-2-Sulfate
DB01982	D-Mannuronic Acid
DB01983	2(S)-Amino-6-Boronohexanoic Acid
DB01984	4-[2-(3-Benzyloxycarbonylamino-4-Cyclohexyl-1-Hydroxy-2-Oxo-Butylamino)-5-Guanidino-Pentanoylamino]-4-(1-Carboxy-2-Cyclohexyl-Ethylcarbamoyl)-Butyric Acid
DB01985	N-Alpha-L-Acetyl-Arginine
DB01986	3-Fluoro-2-Methyl-Aniline
DB01987	Thiamin Diphosphate
DB01988	6((S)-3-Benzylpiperazin-1-Yl)-3-(Naphthalen-2-Yl)-4-(Pyridin-4-Yl)Pyrazine
DB01989	Carbobenzoxy-Pro-Lys-Phe-Y(Po2)-Ala-Pro-Ome
DB01990	Cholesterol-Sulfate
DB01991	Tu-514
DB01992	Coenzyme A
DB01993	N-(5'-Phosphopyridoxyl)-D-Alanine
DB01994	2-(Pyrido[1,2-E]Purin-4-Yl)Amino-Ethanol
DB01995	5-Methylcytidine-5'-Monophosphate
DB01996	3-Methylpyridine
DB01997	3-Bromo-7-Nitroindazole
DB01998	2-[3,4-Dihydroxy-2-Hydroxymethyl-5-(2-Hydroxy-Nonyl)-Tetrahydro-Furan-2-Yloxy]-6-Hydroxymethyl-Tetra Hydro-Pyran-3,4,5-Triol
DB01999	5,10,15,20-Tetrakis(4-Sulpfonatophenyl)-21h,23h-Porphine
DB02000	Gamma-Phenyl-Butyric Acid
DB02001	5-(4-Morpholin-4-Yl-Phenylsulfanyl)-2,4-Quinazolinediamine
DB02002	2-Aminoprop-2-Enamide
DB02004	5-(Aminomethyl)-6-(2,4-Dichlorophenyl)-2-(3,5-Dimethoxyphenyl)Pyrimidin-4-Amine
DB02005	2-Oxo-3-Pentenoic Acid
DB02006	Br-Coeleneterazine
DB02007	Alpha-D-Glucose-6-Phosphate
DB02008	1-(2-Fluorobenzyl)-3-Butyl-8-(N-Acetyl-4-Aminobenzyl)-Xanthine
DB02009	L-756,423
DB02010	Staurosporine
DB02011	N-(Phosphonoacetyl)-L-Ornithine
DB02013	Monoazido-Mu-Oxo-Diiron
DB02014	Compound 9
DB02015	Dihydrofolic Acid
DB02016	R048-8071
DB02017	Imidazole-Derived Cellobiose
DB02018	Amido Phenyl Pyruvic Acid
DB02019	Acetyl Dithranol
DB02020	Alrestatin
DB02021	Fidarestat
DB02022	4-Amino-5-Hydroxymethyl-2-Methylpyrimidine
DB02023	8-Oxo-2'-Deoxy-Guanosine-5'-Monophosphate
DB02024	3-phenylpropionic acid
DB02025	L-D-(a-Aminoadipoyl)-L-Cysteinyl-D-Valine
DB02026	Furo[2,3d]Pyrimidine Antifolate
DB02027	N-{(4s)-4-Amino-5-[(2-Aminoethyl)Amino]Pentyl}-N'-Nitroguanidine
DB02028	L-Alpha-Glycerophospho-D-Myo-Inositol-4,5-Bis-Phosphate
DB02029	N-Cyclohexyl-N'-(4-Iodophenyl)Urea
DB02030	Alpha-Ribazole-5'-Phosphate
DB02031	(6s)-5,6,7,8-Tetrahydrofolate
DB02032	1-(3-Mercapto-2-Methyl-Propionyl)-Pyrrolidine-2-Carboxylic Acid
DB02033	N-(3-Cyclopropyl(5,6,7,8,9,10-Hexahydro-2-Oxo-2h-Cycloocta[B]Pyran-3-Yl)Methyl)Phenylbenzensulfonamide
DB02034	Swainsonine
DB02035	1-Hexadecylsulfonyl Fluoride
DB02036	2-(3,4-Dihydro-3-Oxo-2h-Benzo[B][1,4]Thiazin-2-Yl)-N-Hydroxyacetamide
DB02037	2,4-Diamino-4,6-Dihydroxypyrimidine
DB02038	D-Pyridoxyl-N,O-Cycloserylamide-5-Monophosphate
DB02039	S-Acetyl-Cysteine
DB02041	4-Aminophthalhydrazide
DB02042	2-(2-{2-[2-(2-Methoxy-Ethoxy)-Ethoxy]-Ethoxy}-Ethoxy)-Ethanol
DB02043	1,2-Dipalmitoyl-Phosphatidyl-Glycerole
DB02044	N-(3-(Aminomethyl)Benzyl)Acetamidine
DB02045	Amylamine
DB02046	N-[(Furan-2-Yl)Carbonyl]-(S)-Leucyl-(R)-[1-Amino-2(1h-Indol-3-Yl)Ethyl]-Phosphonic Acid
DB02047	2-(1,1'-Biphenyl-4-Yl)Propanoic Acid
DB02048	1,2,4-Triazole-Carboxamidine
DB02049	2-{4-[4-(4-Chloro-Phenoxy)-Benzenesulfonyl]-Tetrahydro-Pyran-4-Yl}-N-Hydroxy-Acetamide
DB02050	Decaethylene Glycol
DB02051	3-[N-[Benzyloxycarbonyl]-Phenylalaninyl-Amino]-5-Phenyl-Pentane-1-Sulfonic Acid 4-Nitro-Phenyl Ester
DB02052	Indirubin-3'-Monoxime
DB02053	Ribose-5-Phosphate
DB02054	Gabaculine
DB02055	N-Butyl-Benzenesulfonamide
DB02056	(5e,13e)-9,15-Dihydroxy-11-Oxoprosta-5,13-Dien-1-Oicacid
DB02057	AMPA
DB02058	SU4984
DB02059	Adenosine-5-Diphosphoribose
DB02060	Cyclohexanone
DB02061	Cellobiose
DB02062	N-[3-[(1-Aminoethyl)(Hydroxy)Phosphoryl]-2-(1,1'-Biphenyl-4-Ylmethyl)Propanoyl]Alanine
DB02063	CRA_16847
DB02065	4-Deoxylactose
DB02066	N7-Methyl-Formycin A
DB02067	Triglu-5-Formyl-Tetrahydrofolate
DB02068	Delta-Amino Valeric Acid
DB02069	N-(2-Flouro-Benzyl)-4-Sulfamoyl-Benzamide
DB02070	L-2-Amino-4-[2-Aminophenyl]-4-Oxobutanoic Acid
DB02071	WAY-151693
DB02072	2-(Oxalyl-Amino)-4,7-Dihydro-5h-Thieno[2,3-C]Thiopyran-3-Carboxylic Acid
DB02074	Butenoic Acid
DB02075	(1s)-1(9-Deazahypoxanthin-9yl)1,4-Dideoxy-1,4-Imino-D-Ribitol-5-Phosphate
DB02076	6-Phosphogluconic Acid
DB02077	L-N(Omega)-Nitroarginine-(4r)-Amino-L-Proline Amide
DB02078	1-Methoxy-2-[2-(2-Methoxy-Ethoxy]-Ethane
DB02079	(Aminooxy)Acetic Acid
DB02080	1-{2-[2-(2-Methoxyethoxy)Ethoxy]Ethoxy}-4-(1,1,3,3-Tetramethylbutyl)Benzene
DB02081	Bis-Benzamidine
DB02082	Phosphoaminophosphonic Acid Guanylate Ester
DB02083	Dimethylglycine
DB02084	CRA_17312
DB02085	1-Aminocyclopropanecarboxylic Acid
DB02086	(3,4-Dihydroxy-Phenyl)-Triphenyl-Arsonium
DB02087	3,5-Difluorobenzenesulfonamide
DB02088	Norleucine Phosphonate
DB02089	CP-526423
DB02090	A Disubstituted Succinyl Caprolactam Hydroxymate Mmp3inhibitor
DB02091	4-(2,4-Dimethyl-Thiazol-5-Yl)-Pyrimidin-2-Ylamine
DB02092	Cholesteryl Linoleate
DB02093	5-Phospho-D-Arabinohydroxamic Acid
DB02094	N-2-Thiophen-2-Yl-Acetamide Boronic Acid
DB02095	Isatin
DB02096	FR221647
DB02097	Cytidine
DB02098	Adenosine-2'-5'-Diphosphate
DB02099	S-azabisabolene
DB02100	Alpha-methyl-D-galactoside
DB02101	Fidarestat(Stereoisomer)
DB02102	DMP450
DB02103	2-Chlorodideoxyadenosine
DB02104	2,4-Diamino-5-Methyl-6-[(3,4,5-Trimethoxy-N-Methylanilino)Methyl]Pyrido[2,3-D]Pyrimidine
DB02105	3,5-Dinitrocatechol
DB02106	[3,5-Dibromo-4-(4-Hydroxy-3-Phenethylcarbamoyl-Phenoxy)-Phenyl]-Acetic Acid
DB02107	Leucine - Reduced Carbonyl
DB02108	2-Aminoethanimidic Acid
DB02109	Hadacidin
DB02110	Protoporphyrin Ix Containing Co
DB02111	3-Hydroxyisoxazole-4-Carboxylic Acid
DB02112	Zk-806450
DB02113	6-Methylpurine
DB02114	Para-Isopropylaniline
DB02115	Daidzin
DB02116	Olomoucine
DB02118	CP-271485
DB02119	6-Hydroxymethyl-7,8-Dihydropterin
DB02120	6-Amino-4-Hydroxymethyl-Cyclohex-4-Ene-1,2,3-Triol
DB02121	Butyramide
DB02122	4-iodo-acetamido phenylboronic acid
DB02123	Glycochenodeoxycholic Acid
DB02124	(2s,3s)-Trans-2,3-Dihydro-3-Hydroxyanthranilic Acid
DB02125	Adamantanone
DB02126	4-Carboxycinnamic Acid
DB02127	Methylphosphonic Acid Diisopropyl Ester
DB02128	[1-(3-Hydroxy-2-Oxo-1-Phenethyl-Propylcarbamoyl)2-Phenyl-Ethyl]-Carbamic Acid Pyridin-4-Ylmethyl Ester
DB02129	Dihydroorotic Acid
DB02130	4-Hydroxy-3-Methoxybenzoate
DB02131	N-1-Methylheptylformamide
DB02132	[3-(4-Bromo-2-Fluoro-Benzyl)-7-Chloro-2,4-Dioxo-3,4-Dihydro-2h-Quinazolin-1-Yl]-Acetic Acid
DB02134	Xanthine
DB02135	4-{2,6,8-Trioxo-9-[(2r,3s,4r)-2,3,4,5-Tetrahydroxypentyl]-1,2,3,6,8,9-Hexahydro-7h-Purin-7-Yl}Butyl Dihydrogen Phosphate
DB02136	Cephalosporin Analog
DB02137	Molybdenum Cofactor
DB02138	Diethyl 4-Methylbenzylphosphonate
DB02139	(2e)-N-Allyl-4-{[3-(4-Bromophenyl)-5-Fluoro-1-Methyl-1h-Indazol-6-Yl]Oxy}-N-Methyl-2-Buten-1-Amine
DB02140	N1-(1-Dimethylcarbamoyl-2-Phenyl-Ethyl)-2-Oxo-N4-(2-Pyridin-2-Yl-Ethyl)-Succinamide
DB02141	S,S'-(1,4-Phenylene-Bis(1,2-Ethanediyl))Bis-Isothiourea
DB02142	Pyridoxamine-5'-Phosphate
DB02143	N-Isopropyl-N'-Hydroxyguanidine
DB02144	1,2-Diacyl-Sn-Glycero-3-Phosphoinositol
DB02145	Butan-1-Ol
DB02146	Atrazine Glutathione Conjugate
DB02148	3-Amino-4-Oxybenzyl-2-Butanone
DB02150	Hydantocidin-5'-Monophosphate
DB02151	Methionine Phosphonate
DB02152	K-252a
DB02153	3-Sulfinoalanine
DB02154	2,3-Bis-Benzo[1,3]Dioxol-5-Ylmethyl-Succinic Acid
DB02155	Balanol Analog 8
DB02156	Sulfopyruvate
DB02157	Beta-Hydroxy Aspartic Acid
DB02158	(1s)-1-(9-Deazaadenin-9-Yl)-1,4,5-Trideoxy-1,4-Imino-5-Methylthio-D-Ribitol
DB02159	R-1,2-Propanediol
DB02160	S-Butyryl-Cystein
DB02161	Hydroxy-Phenyl-Acetic Acid 8-Methyl-8-Aza-Bicyclo[3.2.1]Oct-3-Yl Ester
DB02162	5'-O-(N-Ethyl-Sulfamoyl)Adenosine
DB02163	2,5-Xylidine
DB02164	N-Sulfo-Flavin Mononucleotide
DB02165	Zinc Trihydroxide
DB02166	Propidium
DB02167	N,N-Dimethyl-L-Alanine
DB02168	Bromopurine
DB02169	9,10-Deepithio-9,10-Didehydroacanthifolicin
DB02170	1,8-Di-Hydroxy-4-Nitro-Xanthen-9-One
DB02171	D-Fructose-6-Phosphate (Open Form)
DB02172	2,5-Dideoxy-2,5-Imino-D-Glucitol
DB02173	Co(Iii)-(Deuteroporphyrin Ix)
DB02174	D-Glutamine
DB02175	Malonic acid
DB02176	Mercury Acetate Ion
DB02177	1-Acetyl-4-(4-{4-[(2-Ethoxyphenyl)Thio]-3-Nitrophenyl}Pyridin-2-Yl)Piperazine
DB02178	Phenylacetaldehyde
DB02179	O-Trifluoromethylphenyl Anthranilic Acid
DB02180	Myristoyl-Coa
DB02181	2'-Deoxyguanosine-5'-Triphosphate
DB02182	Hybrid Between B and C Type Hemes (Protoporphyrin Ixcontaining Fe)
DB02184	(2s,3s)-1,4-Dimercaptobutane-2,3-Diol
DB02185	2,4-Dihydroxy-7-(Methyloxy)-2h-1,4-Benzoxazin-3(4h)-One
DB02186	N-Acetyl-D-Galactosamine 6-Sulfate
DB02187	Equilin
DB02188	N-Methylmesoporphyrin Containing Copper
DB02189	2',3'-Dideoxyadenosine-5'-Triphosphate
DB02190	2-Oxalosuccinic Acid
DB02191	(7as,12ar,12bs)-1,2,3,4,7a,12,12a,12b-Octahydroindolo[2,3-a]Quinolizin-7(6h)-One
DB02192	2-Phenyl-Ethanol
DB02193	2-(2-Hydroxy-Phenyl)-1h-Benzoimidazole-5-Carboxamidine
DB02194	8-Benzyl-2-Hydroxy-2-(4-Hydroxy-Benzyl)-6-(4-Hydroxy-Phenyl)-2h-Imidazo[1,2-a]Pyrazin-3-One
DB02195	3-(4-Fluorophenyl)-1-Hydroxy-2-(Pyridin-4-Yl)-1h-Pyrrolo[3,2-B]Pyridine
DB02196	Uridine-Diphosphate-N-Acetylgalactosamine
DB02197	4-[(4-Imidazo[1,2-a]Pyridin-3-Ylpyrimidin-2-Yl)Amino]Benzenesulfonamide
DB02198	2-Bromoacetyl Group
DB02199	1,3-Dedimethyl-1,3-Divinyl Heme
DB02200	3-[N-[Benzyloxycarbonyl]-Phenylalaninyl-Amino]-5-Phenyl-Pentane-1-Sulfonylmethylbenzene
DB02201	Malonate Ion
DB02202	1,3-Butanediol
DB02203	Acetone Cyanohydrin
DB02205	6-(1,1-Dimethylallyl)-2-(1-Hydroxy-1-Methylethyl)-2,3-Dihydro-7h-Furo[3,2-G]Chromen-7-One
DB02207	7-Nitroindazole
DB02209	Pyridoxine-5'-Phosphate
DB02210	Hexane-1,6-Diol
DB02211	N-Methyl-N-Propargyl-1(R)-Aminoindan
DB02212	Pyrophosphate 2-
DB02213	Metanitrophenyl-Alpha-D-Galactoside
DB02214	6,7-Dioxo-5h-8-Ribitylaminolumazine
DB02215	Furoyl-Leucine
DB02216	S-Methylcysteine
DB02217	Dpb-T
DB02218	N-[4-Hydroxymethyl-Cyclohexan-6-Yl-1,2,3-Triol]-4,6-Dideoxy-4-Aminoglucopyranoside
DB02219	3-Cyclohexyl-1-Propylsulfonic Acid
DB02220	Al7089a
DB02221	4-(Aminosulfonyl)-N-[(2,4,6-Trifluorophenyl)Methyl]-Benzamide
DB02222	2,6-Diamino-(S)-9-[2-(Phosphonomethoxy)Propyl]Purine
DB02223	Ly231514 Tetra Glu
DB02224	(2s,3s)-Trans-Dihydroquercetin
DB02225	1,2-Di-N-Pentanoyl-Sn-Glycero-3-Dithiophosphocholine
DB02226	3,8-Diamino-6-Phenyl-5-[6-[1-[2-[(1,2,3,4-Tetrahydro-9-Acridinyl)Amino]Ethyl]-1h-1,2,3-Triazol-4-Yl]Hexyl]-Phenanthridinium
DB02227	4,5-Dihydroxy-Tetrahydro-Pyran-2-Carboxylic Acid
DB02228	2-Fluoro-2-Deoxy-Beta-D-Galactopyranose
DB02229	5'-O-[(L-Methionyl)-Sulphamoyl]Adenosine
DB02230	Immucillin-G
DB02232	1,2-Dihydroxybenzene
DB02233	6-Hydroxy-D-Norleucine
DB02234	Ethylisothiourea
DB02235	Methionine Sulfoxide
DB02236	Glycinamide Ribonucleotide
DB02237	Maltotetraose
DB02238	4-(Methylsulfanyl)-2-Oxobutanoic Acid
DB02239	Laevulinic Acid
DB02240	N-{(1s)-4-[Bis(2-Chloroethyl)Amino]-1-Methylbutyl}-N-(6-Chloro-2-Methoxy-9-Acridinyl)Amine
DB02241	8-Benzyl-2-Hydroperoxy-2-(4-Hydroxy-Benzyl)-6-(4-Hydroxy-Phenyl)-2h-Imidazo[1,2-a]Pyrazin-3-One
DB02242	Cyclohexane Propionic Acid
DB02243	4-Morpholin-4-Yl-Piperidine-1-Carboxylic Acid [1-(3-Benzenesulfonyl-1-Propyl-Allylcarbamoyl)-2-Phenylethyl]-Amide
DB02245	7-Deazaguanine
DB02247	Hydrolyzed Cephalothin
DB02248	3-Methyl-5-Sulfo-Pyrrolidine-2-Carboxylic Acid
DB02249	2-Ethoxyethanol
DB02250	Cu-Bicyclam
DB02251	O-Succinylbenzoate
DB02252	Iodophenyl
DB02253	(1r)-4-[(1e,3e,5e,7z,9e,11z,13e,15e)-17-Hydroxy-3,7,12,16-Tetramethylheptadeca-1,3,5,7,9,11,13,15-Octaen-1-Yl]-3,5,5-Trimethylcyclohex-3-En-1-Ol
DB02254	Trifluoro-thiamin phosphate
DB02255	GM6001
DB02256	2'-Deoxyuridine
DB02257	N-Bromoacetyl-Aminoethyl Phosphate
DB02258	SR11254
DB02259	3-(3,5-Dibromo-4-Hydroxy-Benzoyl)-2-Ethyl-Benzofuran-6-Sulfonic Acid (4-Sulfamoyl-Phenyl)-Amide
DB02260	4-Oxosebacic Acid
DB02261	Platelet Activating Factor
DB02262	Orotic Acid
DB02263	Glyceraldehyde-3-Phosphate
DB02264	O2-Sulfo-Glucuronic Acid
DB02265	Ethyl-Trimethyl-Silane
DB02266	Flufenamic Acid
DB02267	Argininosuccinate
DB02268	4-(Acetylamino)-3-Amino Benzoic Acid
DB02269	[4-({[5-Benzyloxy-1-(3-Carbamimidoyl-Benzyl)-1h-Indole-2-Carbonyl]-Amino}-Methyl)-Phenyl]-Trimethyl-Ammonium
DB02270	Dimethylallyl S-Thiolodiphosphate
DB02271	S-(2-Oxo)Pentadecylcoa
DB02273	2,6-Dimethyl-7-Octen-2-Ol
DB02274	7-Keto-8-Aminopelargonic Acid
DB02275	[2-Aminomethyl-5-Oxo-4-(4-Oxo-Cyclohexa-2,5-Dienylmethyl)-4,5-Dihydro-Imidazol-1-Yl] -Acetaldehyde
DB02276	(S)-2-(Phosphonoxy)Caproyl-L-Leucyl-P-Nitroanilide
DB02277	1-(5-Tert-Butyl-2-Methyl-2h-Pyrazol-3-Yl)-3-(4-Chloro-Phenyl)-Urea
DB02278	7,8-Dihydro-7,7-Dimethyl-6-Hydroxypterin
DB02279	Benzoylformic Acid
DB02280	(R)-Mandelic Acid
DB02281	Formycin
DB02282	5'-Deoxy-5'-Methylthioadenosine
DB02283	2-Phenylamino-Ethanesulfonic Acid
DB02284	1-O-Methyl-Alpha-D-Mannose
DB02285	Protoporphyrin Ix
DB02286	2-Amino-3-(4-Amino-1h-Indol-3-Yl)Propanoic Acid
DB02287	2-(2-Hydroxy-Phenyl)-3h-Benzoimidazole-5-Carboxamidine
DB02288	CRA_9334
DB02289	2-Aminopropanedioic Acid
DB02290	3-{2,6,8-Trioxo-9-[(2s,3s,4r)-2,3,4,5-Tetrahydroxypentyl]-1,2,3,6,8,9-Hexahydro-7h-Purin-7-Yl}Propyl Dihydrogen Phosphate
DB02292	6-Oxo-8,9,10,11-Tetrahydro-7h-Cyclohepta[C][1]Benzopyran-3-O-Sulfamate
DB02293	2,3-Di-O-Phytanly-3-Sn-Glycero-1-Phosphoryl-3'-Sn-Glycerol-1'-Phosphate
DB02294	(5r,6s,7s,8s)-5-Hydroxymethyl-6,7,8-Trihydroxy-Tetrazolo[1,5-a]Piperidine
DB02295	N-[3-(Dimethylamino)Propyl]-2-({[4-({[4-(Formylamino)-1-Methyl-1h-Pyrrol-2-Yl]Carbonyl}Amino)-1-Methyl-1h-Pyrrol-2-Yl]Carbonyl}Amino)-5-Isopropyl-1,3-Thiazole-4-Carboxamide
DB02296	1-Hydroxy-3-Methylbutane
DB02297	2-Amino-6-Chloropyrazine
DB02298	5-Hydroxyamino-3-Methyl-Pyrrolidine-2-Carboxylic Acid
DB02299	Arginineamide
DB02300	Calcipotriol
DB02301	5,10-Methylene-6-Hydrofolic Acid
DB02302	N3, N4-Dimethylarginine
DB02303	(5s)-5-Iododihydro-2,4(1h,3h)-Pyrimidinedione
DB02304	Prostaglandin B2
DB02305	4,5-Dehydro-D-Glucuronic Acid
DB02306	Palmitoyl-Linoleoyl Phosphatidylcholine
[truncated: 4,513 more rows]
