# Supplementary material for: A Systematic Prediction of Multiple Drug-Target Interactions from Chemical, Genomic, and Pharmacological Data
Source: PLoS One. 2012 May 30;7(5):e37608. doi: 10.1371/journal.pone.0037608 (PMC3364341; doi:10.1371/journal.pone.0037608)
Supplement: Supporting Information S5 — All descriptors used in building models. (XLSX) [file pone.0037608.s005.xlsx]

## Sheet: Sheet1
Table S5: All descriptors used in building models
Drug descriptors	Protein descriptors
MW	A
AMW	C
Sv	D
Se	E
Sp	F
Ss	G
Mv	H
Me	I
Mp	K
Ms	L
nAT	M
nSK	N
nBT	P
nBO	Q
nBM	R
SCBO	S
ARR	T
nCIC	V
nCIR	W
RBN	Y
RBF	AA
nDB	AC
nTB	AD
nAB	AE
nH	AF
nC	AG
nN	AH
nO	AI
nP	AK
nS	AL
nF	AM
nCL	AN
nBR	AP
nI	AQ
nB	AR
nHM	AS
nX	AT
nR03	AV
nR04	AW
nR05	AY
nR06	CA
nR07	CC
nR08	CD
nR09	CE
nR10	CF
nR11	CG
nR12	CH
nBnz	CI
ZM1	CK
ZM1V	CL
ZM2	CM
ZM2V	CN
Qindex	CP
SNar	CQ
HNar	CR
GNar	CS
Xt	CT
Dz	CV
Ram	CW
Pol	CY
LPRS	DA
VDA	DC
MSD	DD
SMTI	DE
SMTIV	DF
GMTI	DG
GMTIV	DH
Xu	DI
SPI	DK
W	DL
WA	DM
Har	DN
Har2	DP
QW	DQ
TI1	DR
TI2	DS
STN	DT
HyDp	DV
RHyDp	DW
w	DY
ww	EA
Rww	EC
D/D	ED
Wap	EE
WhetZ	EF
Whetm	EG
Whetv	EH
Whete	EI
Whetp	EK
J	EL
JhetZ	EM
Jhetm	EN
Jhetv	EP
Jhete	EQ
Jhetp	ER
MAXDN	ES
MAXDP	ET
DELS	EV
TIE	EW
S0K	EY
S1K	FA
S2K	FC
S3K	FD
PHI	FE
BLI	FF
CSI	FG
ECC	FH
AECC	FI
DECC	FK
MDDD	FL
UNIP	FM
CENT	FN
VAR	FP
BAC	FQ
Lop	FR
ICR	FS
D/Dr03	FT
D/Dr04	FV
D/Dr05	FW
D/Dr06	FY
D/Dr07	GA
D/Dr08	GC
D/Dr09	GD
D/Dr10	GE
D/Dr11	GF
D/Dr12	GG
T(N..N)	GH
T(N..O)	GI
T(N..S)	GK
T(N..P)	GL
T(N..F)	GM
T(N..Cl)	GN
T(N..Br)	GP
T(N..I)	GQ
T(O..O)	GR
T(O..S)	GS
T(O..P)	GT
T(O..F)	GV
T(O..Cl)	GW
T(O..Br)	GY
T(O..I)	HA
T(S..S)	HC
T(S..P)	HD
T(S..F)	HE
T(S..Cl)	HF
T(S..Br)	HG
T(S..I)	HH
T(P..P)	HI
T(P..F)	HK
T(P..Cl)	HL
T(P..Br)	HM
T(P..I)	HN
T(F..F)	HP
T(F..Cl)	HQ
T(F..Br)	HR
T(F..I)	HS
T(Cl..Cl)	HT
T(Cl..Br)	HV
T(Cl..I)	HW
T(Br..Br)	HY
T(I..I)	IA
MWC01	IC
MWC02	ID
MWC03	IE
MWC04	IF
MWC05	IG
MWC06	IH
MWC07	II
MWC08	IK
MWC09	IL
MWC10	IM
TWC	IN
SRW01	IP
SRW02	IQ
SRW03	IR
SRW04	IS
SRW05	IT
SRW06	IV
SRW07	IW
SRW08	IY
SRW09	KA
SRW10	KC
MPC01	KD
MPC02	KE
MPC03	KF
MPC04	KG
MPC05	KH
MPC06	KI
MPC07	KK
MPC08	KL
MPC09	KM
MPC10	KN
piPC01	KP
piPC02	KQ
piPC03	KR
piPC04	KS
piPC05	KT
piPC06	KV
piPC07	KW
piPC08	KY
piPC09	LA
piPC10	LC
TPC	LD
piID	LE
PCR	LF
PCD	LG
CID	LH
BID	LI
X0	LK
X1	LL
X2	LM
X3	LN
X4	LP
X5	LQ
X0v	LR
X1v	LS
X2v	LT
X3v	LV
X4v	LW
X5v	LY
X1Av	MA
X2Av	MC
X0sol	MD
X1sol	ME
X2sol	MF
X3sol	MG
X4sol	MH
X5sol	MI
XMOD	MK
RDCHI	ML
RDSQ	MM
ISIZ	MN
IAC	MP
IDE	MQ
IDM	MR
IDDE	MS
IDDM	MT
IDET	MV
IDMT	MW
IVDM	MY
HVcpx	NA
Uindex	NC
Vindex	ND
Xindex	NE
Yindex	NF
TIC0	NG
CIC0	NH
IC1	NI
TIC1	NK
CIC1	NL
ATS1m	NM
ATS2m	NN
ATS3m	NP
ATS4m	NQ
ATS5m	NR
ATS6m	NS
ATS7m	NT
ATS8m	NV
ATS1v	NW
ATS2v	NY
ATS3v	PA
ATS4v	PC
ATS5v	PD
ATS6v	PE
ATS7v	PF
ATS8v	PG
ATS1e	PH
ATS2e	PI
ATS3e	PK
ATS4e	PL
ATS5e	PM
ATS6e	PN
ATS7e	PP
ATS8e	PQ
ATS1p	PR
ATS2p	PS
ATS3p	PT
ATS4p	PV
ATS5p	PW
ATS6p	PY
ATS7p	QA
ATS8p	QC
GATS1m	QD
GATS3m	QE
GATS4m	QF
GATS5m	QG
GATS6m	QH
GATS7m	QI
GATS8m	QK
GATS4v	QL
GATS5v	QM
GATS6v	QN
GATS7v	QP
GATS8v	QQ
GATS4e	QR
GATS5e	QS
GATS6e	QT
GATS7e	QV
GATS8e	QW
GATS1p	QY
GATS4p	RA
GATS5p	RC
GATS6p	RD
GATS7p	RE
GATS8p	RF
EPS0	RG
EPS1	RH
EEig03x	RI
EEig04x	RK
EEig05x	RL
EEig06x	RM
EEig07x	RN
EEig08x	RP
EEig09x	RQ
EEig10x	RR
EEig11x	RS
EEig12x	RT
EEig13x	RV
EEig14x	RW
EEig15x	RY
EEig03d	SA
EEig04d	SC
EEig05d	SD
EEig06d	SE
EEig07d	SF
EEig08d	SG
EEig09d	SH
EEig10d	SI
EEig11d	SK
EEig12d	SL
EEig13d	SM
EEig14d	SN
EEig15d	SP
EEig03r	SQ
EEig04r	SR
EEig05r	SS
EEig06r	ST
EEig07r	SV
EEig08r	SW
EEig09r	SY
EEig10r	TA
EEig11r	TC
EEig12r	TD
EEig13r	TE
EEig14r	TF
EEig15r	TG
ESpm03u	TH
ESpm05u	TI
ESpm07u	TK
ESpm08u	TL
ESpm09u	TM
ESpm10u	TN
ESpm11u	TP
ESpm12u	TQ
ESpm13u	TR
ESpm14u	TS
ESpm15u	TT
ESpm01d	TV
ESpm07d	TW
ESpm09d	TY
ESpm10d	VA
ESpm11d	VC
ESpm12d	VD
ESpm13d	VE
ESpm14d	VF
ESpm15d	VG
BEHm1	VH
BEHm6	VI
BEHm7	VK
BEHm8	VL
BELm6	VM
BELm7	VN
BELm8	VP
BEHv6	VQ
BEHv7	VR
BEHv8	VS
BELv6	VT
BELv7	VV
BELv8	VW
BEHe8	VY
BELe5	WA
BELe6	WC
BELe7	WD
BELe8	WE
BEHp6	WF
BEHp7	WG
BEHp8	WH
BELp6	WI
BELp7	WK
BELp8	WL
GGI1	WM
GGI2	WN
GGI3	WP
GGI4	WQ
GGI5	WR
GGI6	WS
GGI7	WT
GGI8	WV
GGI9	WW
GGI10	WY
JGI6	YA
JGI7	YC
JGI8	YD
JGI9	YE
JGI10	YF
Eig1Z	YG
Eig1m	YH
Eig1v	YI
Eig1e	YK
Eig1p	YL
SEigZ	YM
SEigm	YN
SEige	YP
AEigZ	YQ
AEigm	YR
AEigv	YS
AEige	YT
AEigp	YV
VEA1	YW
VRA1	YY
VED1	M-B (1) by AA index 1
VRD1	M-B (2) by AA index 1
VEZ1	M-B (3) by AA index 1
VRZ1	M-B (4) by AA index 1
VEm1	M-B (5) by AA index 1
VRm1	M-B (6) by AA index 1
VEv1	M-B (7) by AA index 1
VRv1	M-B (8) by AA index 1
VEe1	M-B (9) by AA index 1
VRe1	M-B (10) by AA index 1
VEp1	M-B (11) by AA index 1
VRp1	M-B (12) by AA index 1
DP01	M-B (13) by AA index 1
DP02	M-B (14) by AA index 1
DP03	M-B (15) by AA index 1
DP04	M-B (16) by AA index 1
DP05	M-B (17) by AA index 1
DP06	M-B (18) by AA index 1
DP07	M-B (19) by AA index 1
DP08	M-B (20) by AA index 1
DP09	M-B (21) by AA index 1
DP10	M-B (22) by AA index 1
DP11	M-B (23) by AA index 1
DP12	M-B (24) by AA index 1
DP13	M-B (25) by AA index 1
DP14	M-B (26) by AA index 1
DP15	M-B (27) by AA index 1
DP16	M-B (28) by AA index 1
DP17	M-B (29) by AA index 1
DP18	M-B (30) by AA index 1
DP19	M-B (1) by AA index 2
DP20	M-B (2) by AA index 2
W3D	M-B (3) by AA index 2
J3D	M-B (4) by AA index 2
H3D	M-B (5) by AA index 2
AGDD	M-B (6) by AA index 2
DDI	M-B (7) by AA index 2
ADDD	M-B (8) by AA index 2
G1	M-B (9) by AA index 2
G2	M-B (10) by AA index 2
RGyr	M-B (11) by AA index 2
SPAN	M-B (12) by AA index 2
L/Bw	M-B (13) by AA index 2
SEig	M-B (14) by AA index 2
HOMA	M-B (15) by AA index 2
RCI	M-B (16) by AA index 2
AROM	M-B (17) by AA index 2
HOMT	M-B (18) by AA index 2
DISPm	M-B (19) by AA index 2
QXXm	M-B (20) by AA index 2
QYYm	M-B (21) by AA index 2
QZZm	M-B (22) by AA index 2
DISPv	M-B (23) by AA index 2
QXXv	M-B (24) by AA index 2
QYYv	M-B (25) by AA index 2
QZZv	M-B (26) by AA index 2
QXXe	M-B (27) by AA index 2
QYYe	M-B (28) by AA index 2
QZZe	M-B (29) by AA index 2
QXXp	M-B (30) by AA index 2
QYYp	M-B (1) by AA index 4
QZZp	M-B (2) by AA index 4
G(N..N)	M-B (3) by AA index 4
G(N..O)	M-B (4) by AA index 4
G(N..S)	M-B (5) by AA index 4
G(N..P)	M-B (6) by AA index 4
G(N..F)	M-B (7) by AA index 4
G(N..Cl)	M-B (8) by AA index 4
G(N..Br)	M-B (9) by AA index 4
G(N..I)	M-B (10) by AA index 4
G(O..O)	M-B (11) by AA index 4
G(O..S)	M-B (12) by AA index 4
G(O..P)	M-B (13) by AA index 4
G(O..F)	M-B (14) by AA index 4
G(O..Cl)	M-B (15) by AA index 4
G(O..Br)	M-B (16) by AA index 4
G(O..I)	M-B (17) by AA index 4
G(S..S)	M-B (18) by AA index 4
G(S..P)	M-B (19) by AA index 4
G(S..F)	M-B (20) by AA index 4
G(S..Cl)	M-B (21) by AA index 4
G(S..Br)	M-B (22) by AA index 4
G(S..I)	M-B (23) by AA index 4
G(P..P)	M-B (24) by AA index 4
G(P..F)	M-B (25) by AA index 4
G(P..Cl)	M-B (26) by AA index 4
G(P..Br)	M-B (27) by AA index 4
G(P..I)	M-B (28) by AA index 4
G(F..F)	M-B (29) by AA index 4
G(F..Cl)	M-B (30) by AA index 4
G(F..Br)	Moran (1) by AA index 1
G(F..I)	Moran (2) by AA index 1
G(Cl..Cl)	Moran (3) by AA index 1
G(Cl..Br)	Moran (4) by AA index 1
G(Cl..I)	Moran (5) by AA index 1
G(Br..Br)	Moran (6) by AA index 1
G(I..I)	Moran (7) by AA index 1
RDF010u	Moran (8) by AA index 1
RDF015u	Moran (9) by AA index 1
RDF020u	Moran (10) by AA index 1
RDF025u	Moran (11) by AA index 1
RDF030u	Moran (12) by AA index 1
RDF035u	Moran (13) by AA index 1
RDF040u	Moran (14) by AA index 1
RDF045u	Moran (15) by AA index 1
RDF050u	Moran (16) by AA index 1
RDF055u	Moran (17) by AA index 1
RDF060u	Moran (18) by AA index 1
RDF065u	Moran (19) by AA index 1
RDF070u	Moran (20) by AA index 1
RDF075u	Moran (21) by AA index 1
RDF080u	Moran (22) by AA index 1
RDF085u	Moran (23) by AA index 1
RDF090u	Moran (24) by AA index 1
RDF095u	Moran (25) by AA index 1
RDF100u	Moran (26) by AA index 1
RDF105u	Moran (27) by AA index 1
RDF110u	Moran (28) by AA index 1
RDF115u	Moran (29) by AA index 1
RDF120u	Moran (30) by AA index 1
RDF125u	Moran (1) by AA index 2
RDF130u	Moran (2) by AA index 2
RDF135u	Moran (3) by AA index 2
RDF140u	Moran (4) by AA index 2
RDF145u	Moran (5) by AA index 2
RDF150u	Moran (6) by AA index 2
RDF155u	Moran (7) by AA index 2
RDF010m	Moran (8) by AA index 2
RDF015m	Moran (9) by AA index 2
RDF020m	Moran (10) by AA index 2
RDF025m	Moran (11) by AA index 2
RDF030m	Moran (12) by AA index 2
RDF035m	Moran (13) by AA index 2
RDF040m	Moran (14) by AA index 2
RDF045m	Moran (15) by AA index 2
RDF050m	Moran (16) by AA index 2
RDF055m	Moran (17) by AA index 2
RDF060m	Moran (18) by AA index 2
RDF065m	Moran (19) by AA index 2
RDF070m	Moran (20) by AA index 2
RDF075m	Moran (21) by AA index 2
RDF080m	Moran (22) by AA index 2
RDF085m	Moran (23) by AA index 2
RDF090m	Moran (24) by AA index 2
RDF095m	Moran (25) by AA index 2
RDF100m	Moran (26) by AA index 2
RDF105m	Moran (27) by AA index 2
RDF110m	Moran (28) by AA index 2
RDF115m	Moran (29) by AA index 2
RDF120m	Moran (30) by AA index 2
RDF125m	Moran (1) by AA index 4
RDF130m	Moran (2) by AA index 4
RDF135m	Moran (3) by AA index 4
RDF140m	Moran (4) by AA index 4
RDF145m	Moran (5) by AA index 4
RDF150m	Moran (6) by AA index 4
RDF155m	Moran (7) by AA index 4
RDF010v	Moran (8) by AA index 4
RDF015v	Moran (9) by AA index 4
RDF020v	Moran (10) by AA index 4
RDF025v	Moran (11) by AA index 4
RDF030v	Moran (12) by AA index 4
RDF035v	Moran (13) by AA index 4
RDF040v	Moran (14) by AA index 4
RDF045v	Moran (15) by AA index 4
RDF050v	Moran (16) by AA index 4
RDF055v	Moran (17) by AA index 4
RDF060v	Moran (18) by AA index 4
RDF065v	Moran (19) by AA index 4
RDF070v	Moran (20) by AA index 4
RDF075v	Moran (21) by AA index 4
RDF080v	Moran (22) by AA index 4
RDF085v	Moran (23) by AA index 4
RDF090v	Moran (24) by AA index 4
RDF095v	Moran (25) by AA index 4
RDF100v	Moran (26) by AA index 4
RDF105v	Moran (27) by AA index 4
RDF110v	Moran (28) by AA index 4
RDF115v	Moran (29) by AA index 4
RDF120v	Moran (30) by AA index 4
RDF125v	Geary (1) by AA index 1
RDF130v	Geary (2) by AA index 1
RDF135v	Geary (3) by AA index 1
RDF140v	Geary (4) by AA index 1
RDF145v	Geary (5) by AA index 1
RDF150v	Geary (6) by AA index 1
RDF155v	Geary (7) by AA index 1
RDF010e	Geary (8) by AA index 1
RDF015e	Geary (9) by AA index 1
RDF020e	Geary (10) by AA index 1
RDF025e	Geary (11) by AA index 1
RDF030e	Geary (12) by AA index 1
RDF035e	Geary (13) by AA index 1
RDF040e	Geary (14) by AA index 1
RDF045e	Geary (15) by AA index 1
RDF050e	Geary (16) by AA index 1
RDF055e	Geary (17) by AA index 1
RDF060e	Geary (18) by AA index 1
RDF065e	Geary (19) by AA index 1
RDF070e	Geary (20) by AA index 1
RDF075e	Geary (21) by AA index 1
RDF080e	Geary (22) by AA index 1
RDF085e	Geary (23) by AA index 1
RDF090e	Geary (24) by AA index 1
RDF095e	Geary (25) by AA index 1
RDF100e	Geary (26) by AA index 1
RDF105e	Geary (27) by AA index 1
RDF110e	Geary (28) by AA index 1
RDF115e	Geary (29) by AA index 1
RDF120e	Geary (30) by AA index 1
RDF125e	Geary (1) by AA index 2
RDF130e	Geary (2) by AA index 2
RDF135e	Geary (3) by AA index 2
RDF140e	Geary (4) by AA index 2
RDF145e	Geary (5) by AA index 2
RDF150e	Geary (6) by AA index 2
RDF155e	Geary (7) by AA index 2
RDF010p	Geary (8) by AA index 2
RDF015p	Geary (9) by AA index 2
RDF020p	Geary (10) by AA index 2
RDF025p	Geary (11) by AA index 2
RDF030p	Geary (12) by AA index 2
RDF035p	Geary (13) by AA index 2
RDF040p	Geary (14) by AA index 2
RDF045p	Geary (15) by AA index 2
RDF050p	Geary (16) by AA index 2
RDF055p	Geary (17) by AA index 2
RDF060p	Geary (18) by AA index 2
RDF065p	Geary (19) by AA index 2
RDF070p	Geary (20) by AA index 2
RDF075p	Geary (21) by AA index 2
RDF080p	Geary (22) by AA index 2
RDF085p	Geary (23) by AA index 2
RDF090p	Geary (24) by AA index 2
RDF095p	Geary (25) by AA index 2
RDF100p	Geary (26) by AA index 2
RDF105p	Geary (27) by AA index 2
RDF110p	Geary (28) by AA index 2
RDF115p	Geary (29) by AA index 2
RDF120p	Geary (30) by AA index 2
RDF125p	Geary (1) by AA index 4
RDF130p	Geary (2) by AA index 4
RDF135p	Geary (3) by AA index 4
RDF140p	Geary (4) by AA index 4
RDF145p	Geary (5) by AA index 4
RDF150p	Geary (6) by AA index 4
RDF155p	Geary (7) by AA index 4
Mor01u	Geary (8) by AA index 4
Mor02u	Geary (9) by AA index 4
Mor03u	Geary (10) by AA index 4
Mor04u	Geary (11) by AA index 4
Mor05u	Geary (12) by AA index 4
Mor09u	Geary (13) by AA index 4
Mor10u	Geary (14) by AA index 4
Mor11u	Geary (15) by AA index 4
Mor12u	Geary (16) by AA index 4
Mor17u	Geary (17) by AA index 4
Mor18u	Geary (18) by AA index 4
Mor19u	Geary (19) by AA index 4
Mor24u	Geary (20) by AA index 4
Mor25u	Geary (21) by AA index 4
Mor01m	Geary (22) by AA index 4
Mor02m	Geary (23) by AA index 4
Mor03m	Geary (24) by AA index 4
Mor10m	Geary (25) by AA index 4
Mor11m	Geary (26) by AA index 4
Mor19m	Geary (27) by AA index 4
Mor24m	Geary (28) by AA index 4
Mor25m	Geary (29) by AA index 4
Mor01v	Geary (30) by AA index 4
Mor02v	Composition of Hydrophobicity(1)
Mor03v	Composition of Hydrophobicity(2)
Mor04v	Composition of Hydrophobicity(3)
Mor10v	Composition of Normalized vdW volumes(1)
Mor11v	Composition of Normalized vdW volumes(2)
Mor19v	Composition of Normalized vdW volumes(3)
Mor25v	Composition of Polarity(1)
Mor01e	Composition of Polarity(2)
Mor02e	Composition of Polarity(3)
Mor03e	Composition of Polarizability(1)
Mor04e	Composition of Polarizability(2)
Mor09e	Composition of Polarizability(3)
Mor10e	Composition of Charge(1)
Mor11e	Composition of Charge(2)
Mor17e	Composition of Charge(3)
Mor18e	Composition of Secondary structure(1)
Mor19e	Composition of Secondary structure(2)
Mor24e	Composition of Secondary structure(3)
Mor25e	Composition of Solvent accessibility(1)
Mor01p	Composition of Solvent accessibility(2)
Mor02p	Composition of Solvent accessibility(3)
Mor03p	Transition of Hydrophobicity(1)
Mor04p	Transition of Hydrophobicity(2)
Mor10p	Transition of Hydrophobicity(3)
Mor11p	Transition of Normalized vdW volumes(1)
Mor19p	Transition of Normalized vdW volumes(2)
Mor25p	Transition of Normalized vdW volumes(3)
L1u	Transition of Polarity(1)
L2u	Transition of Polarity(2)
L3u	Transition of Polarity(3)
G1u	Transition of Polarizability(1)
E3u	Transition of Polarizability(2)
L1m	Transition of Polarizability(3)
L2m	Transition of Charge(1)
G2m	Transition of Charge(2)
L1v	Transition of Charge(3)
L2v	Transition of Secondary structure(1)
L3v	Transition of Secondary structure(2)
G2v	Transition of Secondary structure(3)
L1e	Transition of Solvent accessibility(1)
L2e	Transition of Solvent accessibility(2)
L3e	Transition of Solvent accessibility(3)
G2e	Distribution of Hydrophobicity(1)
E3e	Distribution of Hydrophobicity(2)
L1p	Distribution of Hydrophobicity(3)
L2p	Distribution of Hydrophobicity(4)
L3p	Distribution of Hydrophobicity(5)
G2p	Distribution of Hydrophobicity(6)
L1s	Distribution of Hydrophobicity(7)
L2s	Distribution of Hydrophobicity(8)
Tu	Distribution of Hydrophobicity(9)
Tm	Distribution of Hydrophobicity(10)
Tv	Distribution of Hydrophobicity(11)
Te	Distribution of Hydrophobicity(12)
Tp	Distribution of Hydrophobicity(13)
Ts	Distribution of Hydrophobicity(14)
Au	Distribution of Hydrophobicity(15)
Am	Distribution of Normalized vdW volumes(1)
Av	Distribution of Normalized vdW volumes(2)
Ae	Distribution of Normalized vdW volumes(3)
Ap	Distribution of Normalized vdW volumes(4)
As	Distribution of Normalized vdW volumes(5)
Vu	Distribution of Normalized vdW volumes(6)
Vm	Distribution of Normalized vdW volumes(7)
Vv	Distribution of Normalized vdW volumes(8)
Ve	Distribution of Normalized vdW volumes(9)
Vp	Distribution of Normalized vdW volumes(10)
Vs	Distribution of Normalized vdW volumes(11)
ITH	Distribution of Normalized vdW volumes(12)
HGM	Distribution of Normalized vdW volumes(13)
H3u	Distribution of Normalized vdW volumes(14)
H4u	Distribution of Normalized vdW volumes(15)
H5u	Distribution of Polarity(1)
H6u	Distribution of Polarity(2)
H7u	Distribution of Polarity(3)
H8u	Distribution of Polarity(4)
HTu	Distribution of Polarity(5)
H0m	Distribution of Polarity(6)
H3m	Distribution of Polarity(7)
H4m	Distribution of Polarity(8)
H5m	Distribution of Polarity(9)
H6m	Distribution of Polarity(10)
H7m	Distribution of Polarity(11)
H8m	Distribution of Polarity(12)
HTm	Distribution of Polarity(13)
HATS0m	Distribution of Polarity(14)
HATS1m	Distribution of Polarity(15)
HATS2m	Distribution of Polarizability(1)
HATS3m	Distribution of Polarizability(2)
HATS4m	Distribution of Polarizability(3)
HATS5m	Distribution of Polarizability(4)
HATS6m	Distribution of Polarizability(5)
HATS7m	Distribution of Polarizability(6)
HATS8m	Distribution of Polarizability(7)
HATSm	Distribution of Polarizability(8)
H8v	Distribution of Polarizability(9)
HTv	Distribution of Polarizability(10)
HATS0v	Distribution of Polarizability(11)
HATS1v	Distribution of Polarizability(12)
HATS6v	Distribution of Polarizability(13)
HATS7v	Distribution of Polarizability(14)
HATS8v	Distribution of Polarizability(15)
H4e	Distribution of Charge(1)
H5e	Distribution of Charge(2)
H6e	Distribution of Charge(3)
H7e	Distribution of Charge(4)
H8e	Distribution of Charge(5)
HTe	Distribution of Charge(6)
H0p	Distribution of Charge(7)
H8p	Distribution of Charge(8)
HTp	Distribution of Charge(9)
HATS0p	Distribution of Charge(10)
HATS1p	Distribution of Charge(11)
HATS2p	Distribution of Charge(12)
HATS8p	Distribution of Charge(13)
HATSp	Distribution of Charge(14)
RCON	Distribution of Charge(15)
RTu	Distribution of Secondary structure(1)
R7u+	Distribution of Secondary structure(2)
R8u+	Distribution of Secondary structure(3)
R1m	Distribution of Secondary structure(4)
R2m	Distribution of Secondary structure(5)
R3m	Distribution of Secondary structure(6)
R4m	Distribution of Secondary structure(7)
R7m	Distribution of Secondary structure(8)
RTm	Distribution of Secondary structure(9)
R1m+	Distribution of Secondary structure(10)
R2m+	Distribution of Secondary structure(11)
R3m+	Distribution of Secondary structure(12)
R4m+	Distribution of Secondary structure(13)
R5m+	Distribution of Secondary structure(14)
R6m+	Distribution of Secondary structure(15)
R7m+	Distribution of Solvent accessibility(1)
R8m+	Distribution of Solvent accessibility(2)
RTm+	Distribution of Solvent accessibility(3)
RTv	Distribution of Solvent accessibility(4)
R2v+	Distribution of Solvent accessibility(5)
R3v+	Distribution of Solvent accessibility(6)
R4v+	Distribution of Solvent accessibility(7)
R5v+	Distribution of Solvent accessibility(8)
R6v+	Distribution of Solvent accessibility(9)
R7v+	Distribution of Solvent accessibility(10)
R8v+	Distribution of Solvent accessibility(11)
RTe	Distribution of Solvent accessibility(12)
R7e+	Distribution of Solvent accessibility(13)
R8e+	Distribution of Solvent accessibility(14)
RTp	Distribution of Solvent accessibility(15)
R1p+	SOCN in QSOD (1) using Schneider-Wrede distance
R2p+	SOCN in QSOD (2) using Schneider-Wrede distance
R3p+	SOCN in QSOD (3) using Schneider-Wrede distance
R4p+	SOCN in QSOD (4) using Schneider-Wrede distance
R5p+	SOCN in QSOD (5) using Schneider-Wrede distance
R6p+	SOCN in QSOD (6) using Schneider-Wrede distance
R7p+	SOCN in QSOD (7) using Schneider-Wrede distance
R8p+	SOCN in QSOD (8) using Schneider-Wrede distance
RTp+	SOCN in QSOD (9) using Schneider-Wrede distance
nCp	SOCN in QSOD (10) using Schneider-Wrede distance
nCs	SOCN in QSOD (11) using Schneider-Wrede distance
nCt	SOCN in QSOD (12) using Schneider-Wrede distance
nCq	SOCN in QSOD (13) using Schneider-Wrede distance
nCrs	SOCN in QSOD (14) using Schneider-Wrede distance
nCrt	SOCN in QSOD (15) using Schneider-Wrede distance
nCrq	SOCN in QSOD (16) using Schneider-Wrede distance
nCar	SOCN in QSOD (17) using Schneider-Wrede distance
nCbH	SOCN in QSOD (18) using Schneider-Wrede distance
nCb-	SOCN in QSOD (19) using Schneider-Wrede distance
nCconj	SOCN in QSOD (20) using Schneider-Wrede distance
nR=Cp	SOCN in QSOD (21) using Schneider-Wrede distance
nR=Cs	SOCN in QSOD (22) using Schneider-Wrede distance
nR=Ct	SOCN in QSOD (23) using Schneider-Wrede distance
n=C=	SOCN in QSOD (24) using Schneider-Wrede distance
nR#CH/X	SOCN in QSOD (25) using Schneider-Wrede distance
nR#C-	SOCN in QSOD (26) using Schneider-Wrede distance
nRCOOH	SOCN in QSOD (27) using Schneider-Wrede distance
nArCOOH	SOCN in QSOD (28) using Schneider-Wrede distance
nRCOOR	SOCN in QSOD (29) using Schneider-Wrede distance
nArCOOR	SOCN in QSOD (30) using Schneider-Wrede distance
nRCONH2	QSOD in QSOD (1) using Schneider-Wrede distance
nArCONH2	QSOD in QSOD (2) using Schneider-Wrede distance
nRCONHR	QSOD in QSOD (3) using Schneider-Wrede distance
nArCONHR	QSOD in QSOD (4) using Schneider-Wrede distance
nRCONR2	QSOD in QSOD (5) using Schneider-Wrede distance
nArCONR2	QSOD in QSOD (6) using Schneider-Wrede distance
nROCON	QSOD in QSOD (7) using Schneider-Wrede distance
nArOCON	QSOD in QSOD (8) using Schneider-Wrede distance
nRCOSR	QSOD in QSOD (9) using Schneider-Wrede distance
nArCOSR	QSOD in QSOD (10) using Schneider-Wrede distance
nRCHO	QSOD in QSOD (11) using Schneider-Wrede distance
nArCHO	QSOD in QSOD (12) using Schneider-Wrede distance
nRCO	QSOD in QSOD (13) using Schneider-Wrede distance
nArCO	QSOD in QSOD (14) using Schneider-Wrede distance
nCONN	QSOD in QSOD (15) using Schneider-Wrede distance
nC=O(O)2	QSOD in QSOD (16) using Schneider-Wrede distance
nN=C-N<	QSOD in QSOD (17) using Schneider-Wrede distance
nC(=N)N2	QSOD in QSOD (18) using Schneider-Wrede distance
nRC=N	QSOD in QSOD (19) using Schneider-Wrede distance
nArC=N	QSOD in QSOD (20) using Schneider-Wrede distance
nRCNO	QSOD in QSOD (21) using Schneider-Wrede distance
nArCNO	QSOD in QSOD (22) using Schneider-Wrede distance
nRNH2	QSOD in QSOD (23) using Schneider-Wrede distance
nArNH2	QSOD in QSOD (24) using Schneider-Wrede distance
nRNHR	QSOD in QSOD (25) using Schneider-Wrede distance
nArNHR	QSOD in QSOD (26) using Schneider-Wrede distance
nRNR2	QSOD in QSOD (27) using Schneider-Wrede distance
nArNR2	QSOD in QSOD (28) using Schneider-Wrede distance
nN-N	QSOD in QSOD (29) using Schneider-Wrede distance
nN=N	QSOD in QSOD (30) using Schneider-Wrede distance
nRCN	QSOD in QSOD (31) using Schneider-Wrede distance
nArCN	QSOD in QSOD (32) using Schneider-Wrede distance
nN+	QSOD in QSOD (33) using Schneider-Wrede distance
nNq	QSOD in QSOD (34) using Schneider-Wrede distance
nRNHO	QSOD in QSOD (35) using Schneider-Wrede distance
nArNHO	QSOD in QSOD (36) using Schneider-Wrede distance
nRNNOx	QSOD in QSOD (37) using Schneider-Wrede distance
nRNO	QSOD in QSOD (38) using Schneider-Wrede distance
nArNO	QSOD in QSOD (39) using Schneider-Wrede distance
nRNO2	QSOD in QSOD (40) using Schneider-Wrede distance
nArNO2	QSOD in QSOD (41) using Schneider-Wrede distance
nN(CO)2	QSOD in QSOD (42) using Schneider-Wrede distance
nC=N-N<	QSOD in QSOD (43) using Schneider-Wrede distance
nROH	QSOD in QSOD (44) using Schneider-Wrede distance
nArOH	QSOD in QSOD (45) using Schneider-Wrede distance
nOHp	QSOD in QSOD (46) using Schneider-Wrede distance
nOHs	QSOD in QSOD (47) using Schneider-Wrede distance
nOHt	QSOD in QSOD (48) using Schneider-Wrede distance
nROR	QSOD in QSOD (49) using Schneider-Wrede distance
nArOR	QSOD in QSOD (50) using Schneider-Wrede distance
nSH	SOCN in QSOD (1) using normalized Grantham chemical distance
nRSR	SOCN in QSOD (2) using normalized Grantham chemical distance
nRSSR	SOCN in QSOD (3) using normalized Grantham chemical distance
nSO	SOCN in QSOD (4) using normalized Grantham chemical distance
nS(=O)2	SOCN in QSOD (5) using normalized Grantham chemical distance
nSOH	SOCN in QSOD (6) using normalized Grantham chemical distance
nSOOH	SOCN in QSOD (7) using normalized Grantham chemical distance
nSO2OH	SOCN in QSOD (8) using normalized Grantham chemical distance
nSO3OH	SOCN in QSOD (9) using normalized Grantham chemical distance
nSO3	SOCN in QSOD (10) using normalized Grantham chemical distance
nSO4	SOCN in QSOD (11) using normalized Grantham chemical distance
nSO2N	SOCN in QSOD (12) using normalized Grantham chemical distance
nPO4	SOCN in QSOD (13) using normalized Grantham chemical distance
nP(=O)O2R	SOCN in QSOD (14) using normalized Grantham chemical distance
nCH2RX	SOCN in QSOD (15) using normalized Grantham chemical distance
nCHR2X	SOCN in QSOD (16) using normalized Grantham chemical distance
nR=CHX	SOCN in QSOD (17) using normalized Grantham chemical distance
nR=CRX	SOCN in QSOD (18) using normalized Grantham chemical distance
nCHRX2	SOCN in QSOD (19) using normalized Grantham chemical distance
nCR2X2	SOCN in QSOD (20) using normalized Grantham chemical distance
nR=CX2	SOCN in QSOD (21) using normalized Grantham chemical distance
nCRX3	SOCN in QSOD (22) using normalized Grantham chemical distance
nArX	SOCN in QSOD (23) using normalized Grantham chemical distance
nCXr	SOCN in QSOD (24) using normalized Grantham chemical distance
nCXr=	SOCN in QSOD (25) using normalized Grantham chemical distance
nCconjX	SOCN in QSOD (26) using normalized Grantham chemical distance
nAziridines	SOCN in QSOD (27) using normalized Grantham chemical distance
nOxiranes	SOCN in QSOD (28) using normalized Grantham chemical distance
nOxetanes	SOCN in QSOD (29) using normalized Grantham chemical distance
nBeta-Lactams	SOCN in QSOD (30) using normalized Grantham chemical distance
nPyrrolidines	QSOD in QSOD (1) using normalized Grantham chemical distance
nOxolanes	QSOD in QSOD (2) using normalized Grantham chemical distance
ntH-Thiophenes	QSOD in QSOD (3) using normalized Grantham chemical distance
nPyrroles	QSOD in QSOD (4) using normalized Grantham chemical distance
nPyrazoles	QSOD in QSOD (5) using normalized Grantham chemical distance
nImidazoles	QSOD in QSOD (6) using normalized Grantham chemical distance
nFuranes	QSOD in QSOD (7) using normalized Grantham chemical distance
nThiophenes	QSOD in QSOD (8) using normalized Grantham chemical distance
nOxazoles	QSOD in QSOD (9) using normalized Grantham chemical distance
nIsoxazoles	QSOD in QSOD (10) using normalized Grantham chemical distance
nThiazoles	QSOD in QSOD (11) using normalized Grantham chemical distance
nIsothiazoles	QSOD in QSOD (12) using normalized Grantham chemical distance
nTriazoles	QSOD in QSOD (13) using normalized Grantham chemical distance
nPyridines	QSOD in QSOD (14) using normalized Grantham chemical distance
nPyridazines	QSOD in QSOD (15) using normalized Grantham chemical distance
nPyrimidines	QSOD in QSOD (16) using normalized Grantham chemical distance
nPyrazines	QSOD in QSOD (17) using normalized Grantham chemical distance
n135-Triazines	QSOD in QSOD (18) using normalized Grantham chemical distance
n124-Triazines	QSOD in QSOD (19) using normalized Grantham chemical distance
nHDon	QSOD in QSOD (20) using normalized Grantham chemical distance
nHAcc	QSOD in QSOD (21) using normalized Grantham chemical distance
nHBonds	QSOD in QSOD (22) using normalized Grantham chemical distance
C-001	QSOD in QSOD (23) using normalized Grantham chemical distance
C-002	QSOD in QSOD (24) using normalized Grantham chemical distance
C-003	QSOD in QSOD (25) using normalized Grantham chemical distance
C-004	QSOD in QSOD (26) using normalized Grantham chemical distance
C-005	QSOD in QSOD (27) using normalized Grantham chemical distance
C-006	QSOD in QSOD (28) using normalized Grantham chemical distance
C-007	QSOD in QSOD (29) using normalized Grantham chemical distance
C-008	QSOD in QSOD (30) using normalized Grantham chemical distance
C-009	QSOD in QSOD (31) using normalized Grantham chemical distance
C-010	QSOD in QSOD (32) using normalized Grantham chemical distance
C-011	QSOD in QSOD (33) using normalized Grantham chemical distance
C-012	QSOD in QSOD (34) using normalized Grantham chemical distance
C-013	QSOD in QSOD (35) using normalized Grantham chemical distance
C-014	QSOD in QSOD (36) using normalized Grantham chemical distance
C-015	QSOD in QSOD (37) using normalized Grantham chemical distance
C-016	QSOD in QSOD (38) using normalized Grantham chemical distance
C-017	QSOD in QSOD (39) using normalized Grantham chemical distance
C-018	QSOD in QSOD (40) using normalized Grantham chemical distance
C-019	QSOD in QSOD (41) using normalized Grantham chemical distance
C-020	QSOD in QSOD (42) using normalized Grantham chemical distance
C-021	QSOD in QSOD (43) using normalized Grantham chemical distance
C-022	QSOD in QSOD (44) using normalized Grantham chemical distance
C-023	QSOD in QSOD (45) using normalized Grantham chemical distance
C-024	QSOD in QSOD (46) using normalized Grantham chemical distance
C-025	QSOD in QSOD (47) using normalized Grantham chemical distance
C-026	QSOD in QSOD (48) using normalized Grantham chemical distance
C-027	QSOD in QSOD (49) using normalized Grantham chemical distance
C-028	QSOD in QSOD (50) using normalized Grantham chemical distance
C-029	APAAC 1 (1)
C-030	APAAC 1 (2)
C-031	APAAC 1 (3)
C-032	APAAC 1 (4)
C-033	APAAC 1 (5)
C-034	APAAC 1 (6)
C-035	APAAC 1 (7)
C-036	APAAC 1 (8)
C-037	APAAC 1 (9)
C-038	APAAC 1 (10)
C-039	APAAC 1 (11)
C-040	APAAC 1 (12)
C-041	APAAC 1 (13)
C-042	APAAC 1 (14)
C-043	APAAC 1 (15)
C-044	APAAC 1 (16)
H-046	APAAC 1 (17)
H-047	APAAC 1 (18)
H-048	APAAC 1 (19)
H-049	APAAC 1 (20)
H-050	APAAC 1 (21)
H-051	APAAC 1 (22)
H-052	APAAC 1 (23)
H-053	APAAC 1 (24)
H-054	APAAC 1 (25)
H-055	APAAC 1 (26)
O-056	APAAC 1 (27)
O-057	APAAC 1 (28)
O-058	APAAC 1 (29)
O-059	APAAC 1 (30)
O-060	APAAC 1 (31)
O-061	APAAC 1 (32)
O-062	APAAC 1 (33)
O-063	APAAC 1 (34)
Se-064	APAAC 1 (35)
Se-065	APAAC 1 (36)
N-066	APAAC 1 (37)
N-067	APAAC 1 (38)
N-068	APAAC 1 (39)
N-069	APAAC 1 (40)
N-070	APAAC 1 (41)
N-071	APAAC 1 (42)
N-072	APAAC 1 (43)
N-073	APAAC 1 (44)
N-074	APAAC 1 (45)
N-075	APAAC 1 (46)
N-076	APAAC 1 (47)
N-077	APAAC 1 (48)
N-078	APAAC 1 (49)
N-079	APAAC 1 (50)
F-081	APAAC 1 (51)
F-082	APAAC 1 (52)
F-083	APAAC 1 (53)
F-084	APAAC 1 (54)
F-085	APAAC 1 (55)
Cl-086	APAAC 1 (56)
Cl-087	APAAC 1 (57)
Cl-088	APAAC 1 (58)
Cl-089	APAAC 1 (59)
Cl-090	APAAC 1 (60)
Br-091	APAAC 1 (61)
Br-092	APAAC 1 (62)
Br-094	APAAC 1 (63)
Br-095	APAAC 1 (64)
I-096	APAAC 1 (65)
I-099	APAAC 1 (66)
I-100	APAAC 1 (67)
S-106	APAAC 1 (68)
S-107	APAAC 1 (69)
S-108	APAAC 1 (70)
S-109	APAAC 1 (71)
S-110	APAAC 1 (72)
Si-111	APAAC 1 (73)
B-112	APAAC 1 (74)
P-116	APAAC 1 (75)
P-117	APAAC 1 (76)
P-120	APAAC 1 (77)
Ui	APAAC 1 (78)
Hy	APAAC 1 (79)
TPSA(NO)	APAAC 1 (80)
TPSA(Tot)	Total property by aaindex in segment 1 for property 1
MLOGP2	Total property by aaindex in segment 1 for property 2
LAI	Total property by aaindex in segment 1 for property 4
