# Supplementary material for: A Systematic Prediction of Multiple Drug-Target Interactions from Chemical, Genomic, and Pharmacological Data
Source: PLoS One. 2012 May 30;7(5):e37608. doi: 10.1371/journal.pone.0037608 (PMC3364341; doi:10.1371/journal.pone.0037608)
Supplement: Supporting Information S10 — The blind testing dataset obtained from the KEGG database. (XLSX) [file pone.0037608.s010.xlsx]

## Sheet: Sheet1
Table S8： The blind testing dataset obtained from the KEGG database
Protein ID	Compound ID
hsa:10	D00007
hsa:100	D00014
hsa:10056	D00018
hsa:1017	D00021
hsa:1018	D00027
hsa:10188	D00029
hsa:1019	D00032
hsa:1020	D00035
hsa:1021	D00036
hsa:1022	D00037
hsa:1024	D00038
hsa:1025	D00039
hsa:10269	D00041
hsa:10279	D00043
hsa:10295	D00045
hsa:10327	D00049
hsa:1033	D00050
hsa:10461	D00052
hsa:10549	D00054
hsa:1056	D00055
hsa:10667	D00065
hsa:107	D00070
hsa:10720	D00086
hsa:10747	D00094
hsa:108	D00097
hsa:10825	D00103
hsa:10846	D00109
hsa:10858	D00118
hsa:109	D00120
hsa:10901	D00125
hsa:10924	D00126
hsa:10935	D00127
hsa:10941	D00129
hsa:11072	D00130
hsa:111	D00131
hsa:112	D00132
hsa:11202	D00136
hsa:11221	D00139
hsa:11238	D00141
hsa:11266	D00142
hsa:113	D00145
hsa:11330	D00148
hsa:11343	D00151
hsa:114	D00153
hsa:1147	D00155
hsa:115	D00160
hsa:116447	D00168
hsa:1178	D00183
hsa:1200	D00185
hsa:1215	D00186
hsa:124	D00187
hsa:125	D00188
hsa:126	D00196
hsa:1267	D00198
hsa:128	D00208
hsa:128853	D00216
hsa:129807	D00217
hsa:13	D00218
hsa:130399	D00219
hsa:131	D00222
hsa:1312	D00224
hsa:132	D00225
hsa:132160	D00231
hsa:133121	D00234
hsa:134510	D00251
hsa:1360	D00252
hsa:1363	D00270
hsa:1374	D00274
hsa:1376	D00279
hsa:1384	D00283
hsa:142679	D00293
hsa:1429	D00294
hsa:1431	D00300
hsa:1432	D00315
hsa:1436	D00317
hsa:1445	D00322
hsa:150290	D00325
hsa:1504	D00328
hsa:151531	D00330
hsa:1537	D00332
hsa:1543	D00333
hsa:1544	D00340
hsa:1545	D00342
hsa:1548	D00359
hsa:1549	D00364
hsa:1551	D00369
hsa:1553	D00371
hsa:1555	D00377
hsa:1557	D00380
hsa:1558	D00383
hsa:1559	D00387
hsa:1562	D00391
hsa:1565	D00394
hsa:1571	D00401
hsa:1572	D00410
hsa:1573	D00414
hsa:1576	D00416
hsa:1577	D00417
hsa:1579	D00418
hsa:1580	D00421
hsa:1581	D00423
hsa:1582	D00425
hsa:1583	D00434
hsa:1584	D00437
hsa:1585	D00448
hsa:1586	D00449
hsa:1588	D00451
hsa:1589	D00452
hsa:1593	D00454
hsa:1594	D00455
hsa:1595	D00463
hsa:1610	D00475
hsa:1621	D00488
hsa:1633	D00494
hsa:1636	D00496
hsa:1645	D00501
hsa:1675	D00503
hsa:1719	D00510
hsa:1725	D00512
hsa:1728	D00513
hsa:1733	D00515
hsa:1734	D00516
hsa:1735	D00518
hsa:18	D00519
hsa:1800	D00521
hsa:1803	D00528
hsa:1806	D00530
hsa:1843	D00533
hsa:1844	D00535
hsa:1845	D00536
hsa:1847	D00537
hsa:1848	D00538
hsa:1849	D00542
hsa:1850	D00543
hsa:1852	D00544
hsa:189	D00545
hsa:1890	D00546
hsa:191	D00547
hsa:1956	D00549
hsa:196883	D00550
hsa:1969	D00560
hsa:1990	D00562
hsa:1991	D00563
hsa:199974	D00567
hsa:2041	D00568
hsa:2042	D00569
hsa:2043	D00574
hsa:2044	D00577
hsa:2045	D00584
hsa:2046	D00593
hsa:2047	D00625
hsa:2048	D00630
hsa:2049	D00650
hsa:2050	D00651
hsa:2051	D00652
hsa:2058	D00654
hsa:2064	D00655
hsa:2065	D00656
hsa:2066	D00658
hsa:2098	D00691
hsa:2135	D00703
hsa:2147	D00709
hsa:2155	D00726
hsa:2158	D00733
hsa:2159	D00749
hsa:216	D00752
hsa:2160	D00762
hsa:2161	D00771
hsa:217	D00781
hsa:218	D00786
hsa:2180	D00805
hsa:2185	D00884
hsa:219	D00902
hsa:2193	D00947
hsa:2224	D00960
hsa:223	D00963
hsa:2232	D00964
hsa:2235	D00965
hsa:224	D00969
hsa:2241	D01064
hsa:2242	D01071
hsa:225689	D01122
hsa:2260	D01133
hsa:2261	D01136
hsa:2263	D01164
hsa:2264	D01180
hsa:2280	D01183
hsa:22843	D01198
hsa:22954	D01223
hsa:22978	D01256
hsa:23035	D01325
hsa:23097	D01346
hsa:231	D01367
hsa:2321	D01370
hsa:2322	D01397
hsa:23236	D01475
hsa:23239	D01513
hsa:2324	D01547
hsa:2326	D01565
hsa:2328	D01578
hsa:2339	D01582
hsa:2342	D01665
hsa:23430	D01688
hsa:23436	D01690
hsa:23475	D01704
hsa:2356	D01715
hsa:23632	D01718
hsa:238	D01767
hsa:239	D01811
hsa:240	D01825
hsa:242	D01828
hsa:246	D01842
hsa:247	D01866
hsa:25	D01885
hsa:2534	D01900
hsa:2548	D01907
hsa:25796	D01966
hsa:2582	D01974
hsa:25824	D01977
hsa:2595	D01981
hsa:2597	D02008
hsa:260293	D02176
hsa:26279	D02289
hsa:2638	D02304
hsa:2639	D02308
hsa:2673	D02315
hsa:2677	D02321
hsa:270	D02323
hsa:27032	D02328
hsa:27034	D02335
hsa:27115	D02341
hsa:2746	D02342
hsa:2766	D02350
hsa:279	D02355
hsa:28	D02356
hsa:2806	D02368
hsa:2822	D02375
hsa:28227	D02441
hsa:284541	D02556
hsa:2876	D02559
hsa:2877	D02560
hsa:2878	D02561
hsa:2879	D02563
hsa:2882	D02566
hsa:28972	D02579
hsa:2936	D02580
hsa:2950	D02581
hsa:29785	D02671
hsa:29920	D02698
hsa:29941	D02709
hsa:29968	D02769
hsa:30	D03012
hsa:3001	D03034
hsa:3002	D03077
hsa:3028	D03217
hsa:3033	D03218
hsa:3034	D03252
hsa:3035	D03365
hsa:3055	D03440
hsa:306	D03601
hsa:3067	D03643
hsa:30814	D03689
hsa:30833	D03710
hsa:31	D03712
hsa:313	D03714
hsa:3141	D03716
hsa:3156	D03720
hsa:32	D03731
hsa:326625	D03734
hsa:327	D03736
hsa:3283	D03752
hsa:3290	D03753
hsa:3291	D03758
hsa:3292	D03760
hsa:3295	D03763
hsa:3376	D03772
hsa:339221	D03773
hsa:34	D03775
hsa:3416	D03788
hsa:3480	D03798
hsa:349565	D03805
hsa:35	D03806
hsa:353	D03807
hsa:354	D03822
hsa:3551	D03823
hsa:36	D03882
hsa:3612	D03899
hsa:3614	D04025
hsa:3615	D04031
hsa:3643	D04197
hsa:3645	D04292
hsa:3702	D04966
hsa:3712	D04983
hsa:3716	D05341
hsa:3717	D05353
hsa:3718	D05407
hsa:3735	D05458
hsa:377677	D06238
hsa:3791	D00411
hsa:38	D05129
hsa:3815	D00318
hsa:3816	D00113
hsa:3817	D00232
hsa:3818	D00465
hsa:3906	D00524
hsa:390956	D00525
hsa:3932	D00540
hsa:3939	D00646
hsa:3945	D00715
hsa:3988	D00779
hsa:3990	D01103
hsa:3991	D01269
hsa:4017	D01297
hsa:4023	D01871
hsa:4025	D02070
hsa:4048	D02327
hsa:4051	D02354
hsa:4058	D02361
hsa:4067	D03621
hsa:4128	D03858
hsa:4129	D00760
hsa:4143	D00765
hsa:4145	D01699
hsa:4190	D03654
hsa:4191	D03210
hsa:4200	D00306
hsa:4233	D00227
hsa:4281	D01712
hsa:4282	D02884
hsa:43	D04006
hsa:4311	D00255
hsa:4329	D00281
hsa:4353	D00426
hsa:444	D00604
hsa:4482	D00607
hsa:4486	D00609
hsa:4548	D00996
hsa:4552	D01022
hsa:4593	D01024
hsa:4594	D01358
hsa:472	D01603
hsa:4758	D01713
hsa:4759	D02149
hsa:476	D02234
hsa:4835	D00095
hsa:4837	D00954
hsa:4860	D01692
hsa:4881	D02076
hsa:49	D04375
hsa:4907	D02338
hsa:4914	D02614
hsa:4915	D03415
hsa:4916	D03879
hsa:4919	D03881
hsa:4920	D00683
hsa:4921	D00684
hsa:4942	D00687
hsa:495	D05792
hsa:4953	D00059
hsa:50	D00790
hsa:501	D01745
hsa:5033	D03165
hsa:5045	D05246
hsa:50484	D00241
hsa:50487	D03966
hsa:5049	D00520
hsa:5050	D00295
hsa:5051	D00676
hsa:5052	D02826
hsa:5053	D05740
hsa:5091	D00674
hsa:50940	D02357
hsa:5095	D02578
hsa:5096	D01994
hsa:51	D06056
hsa:51004	D06396
hsa:51095	D00838
hsa:51166	D00301
hsa:51181	D00498
hsa:51205	D05113
hsa:51207	D00682
hsa:5122	D02721
hsa:51251	D02725
hsa:5126	D00419
hsa:51292	D03187
hsa:513	D01964
hsa:51302	D00106
hsa:5136	D00769
hsa:51365	D00442
hsa:5137	D02250
hsa:5138	D00336
hsa:5140	D03642
hsa:5141	D01925
hsa:5142	D02007
hsa:5143	D02588
hsa:5144	D03442
hsa:5145	D01441
hsa:5146	D00110
hsa:5147	D00228
hsa:5148	D00303
hsa:5149	D00319
hsa:5150	D00326
hsa:5151	D00329
hsa:5152	D00331
hsa:5156	D00335
hsa:5158	D00338
hsa:5159	D00345
hsa:51601	D00349
hsa:51645	D00351
hsa:5167	D00354
hsa:5168	D00358
hsa:5169	D00367
hsa:51727	D00373
hsa:52	D00379
hsa:5294	D00392
hsa:53	D00438
hsa:5319	D00456
hsa:5320	D00464
hsa:5321	D00474
hsa:5322	D00495
hsa:5327	D00499
hsa:5328	D00504
hsa:5330	D00539
hsa:5331	D00548
hsa:5332	D00552
hsa:5333	D00553
hsa:5335	D00594
hsa:5336	D00618
hsa:5337	D00629
hsa:5338	D00647
hsa:5340	D00697
hsa:5351	D00704
hsa:53938	D00708
hsa:54	D00775
hsa:5406	D01111
hsa:5407	D01253
hsa:5408	D01295
hsa:5422	D01599
hsa:5423	D01799
hsa:5444	D02347
hsa:5445	D02360
hsa:5447	D02362
hsa:54490	D02630
hsa:54575	D03180
hsa:54576	D03742
hsa:54577	D04370
hsa:54578	D04790
hsa:54579	D04985
hsa:54600	D04999
hsa:54657	D05077
hsa:54658	D06106
hsa:54659	D06172
hsa:54677	D00040
hsa:5470	D00066
hsa:5475	D00067
hsa:5476	D00075
hsa:5479	D00088
hsa:5481	D00105
hsa:54878	D00143
hsa:5494	D00163
hsa:5495	D00182
hsa:5496	D00246
hsa:5499	D00299
hsa:55	D00316
hsa:5500	D00327
hsa:5501	D00348
hsa:5515	D00443
hsa:5516	D00462
hsa:5523	D00506
hsa:5530	D00554
hsa:5531	D00565
hsa:55312	D00585
hsa:5532	D00586
hsa:5533	D00627
hsa:55359	D00690
hsa:5536	D00730
hsa:5537	D00898
hsa:5538	D00930
hsa:5547	D00950
hsa:5550	D00951
hsa:55512	D00956
hsa:5562	D00961
hsa:55775	D01115
hsa:558	D01132
hsa:55811	D01161
hsa:55902	D01217
hsa:5594	D01294
hsa:5595	D01387
hsa:5596	D01689
hsa:5597	D02367
hsa:5598	D04066
hsa:5599
hsa:5600
hsa:5601
hsa:5602
hsa:5603
hsa:5604
hsa:5605
hsa:5606
hsa:5607
hsa:5608
hsa:5624
hsa:5625
hsa:5645
hsa:5646
hsa:5650
hsa:5651
hsa:5657
hsa:56922
hsa:57016
hsa:57176
hsa:5740
hsa:5742
hsa:5743
hsa:5747
hsa:5754
hsa:57665
hsa:58190
hsa:5831
hsa:5834
hsa:5836
hsa:5837
hsa:586
hsa:5860
hsa:587
hsa:590
hsa:5972
hsa:6098
hsa:613
hsa:6240
hsa:6241
hsa:6259
hsa:6300
hsa:63036
hsa:635
hsa:63904
hsa:64087
hsa:6416
hsa:64499
hsa:645
hsa:64600
hsa:64802
hsa:64816
hsa:64850
hsa:64902
hsa:657
hsa:658
hsa:660
hsa:6609
hsa:6610
hsa:6646
hsa:6652
hsa:670
hsa:6713
hsa:6714
hsa:6716
hsa:6725
hsa:6768
hsa:6799
hsa:683
hsa:686
hsa:6897
hsa:6898
hsa:695
hsa:7006
hsa:7010
hsa:7015
hsa:7046
hsa:7054
hsa:7075
hsa:7083
hsa:7084
hsa:7150
hsa:7153
hsa:7155
hsa:7156
hsa:7172
hsa:7173
hsa:7174
hsa:7294
hsa:7297
hsa:7298
hsa:7299
hsa:7301
hsa:7363
hsa:7364
hsa:7365
hsa:7366
hsa:7367
hsa:7371
hsa:7372
hsa:7378
hsa:7453
hsa:7498
hsa:7525
hsa:7535
hsa:759
hsa:760
hsa:761
hsa:762
hsa:763
hsa:765
hsa:766
hsa:767
hsa:768
hsa:771
hsa:780
hsa:79001
hsa:7957
hsa:79799
hsa:80339
hsa:80824
hsa:81579
hsa:8192
hsa:8288
hsa:834
hsa:8398
hsa:84152
hsa:84171
hsa:8435
hsa:84532
hsa:84618
hsa:84695
hsa:84706
hsa:84812
hsa:8513
hsa:8529
hsa:85313
hsa:8555
hsa:8556
hsa:8558
hsa:8622
hsa:8654
hsa:8836
hsa:8854
hsa:8940
hsa:8972
hsa:90
hsa:9023
hsa:9088
hsa:91
hsa:91039
hsa:9150
hsa:93
hsa:93650
hsa:9388
hsa:9420
hsa:9563
hsa:9601
hsa:9641
hsa:9647
hsa:983
hsa:9945
hsa:9955
hsa:10161
hsa:10800
hsa:11255
hsa:1128
hsa:1129
hsa:1131
hsa:1132
hsa:1133
hsa:1234
hsa:1241
hsa:1268
hsa:134
hsa:135
hsa:136
hsa:140
hsa:146
hsa:147
hsa:148
hsa:150
hsa:151
hsa:152
hsa:153
hsa:154
hsa:155
hsa:1812
hsa:1813
hsa:1814
hsa:1815
hsa:1816
hsa:185
hsa:1909
hsa:1910
hsa:222545
hsa:23620
hsa:2550
hsa:2846
hsa:2911
hsa:2912
hsa:2913
hsa:2914
hsa:2915
hsa:2916
hsa:2917
hsa:2918
hsa:3269
hsa:3274
hsa:3350
hsa:3351
hsa:3352
hsa:3354
hsa:3355
hsa:3356
hsa:3357
hsa:3358
hsa:3360
hsa:3361
hsa:3362
hsa:3363
hsa:338442
hsa:3577
hsa:4543
hsa:4985
hsa:4986
hsa:4988
hsa:5028
hsa:5029
hsa:5030
hsa:5031
hsa:5032
hsa:552
hsa:554
hsa:56413
hsa:57105
hsa:5724
hsa:5729
hsa:5731
hsa:5732
hsa:5733
hsa:5737
hsa:5739
hsa:59340
hsa:6010
hsa:64805
hsa:6751
hsa:6752
hsa:6753
hsa:6755
hsa:6915
hsa:7201
hsa:8843
hsa:886
hsa:887
hsa:9052
hsa:9283
hsa:9934
hsa:10008
hsa:10060
hsa:10369
hsa:1080
hsa:11254
hsa:11280
hsa:1134
hsa:1135
hsa:1136
hsa:1137
hsa:1138
hsa:1139
hsa:1140
hsa:1141
hsa:1144
hsa:1145
hsa:116443
hsa:116444
hsa:1181
hsa:169522
hsa:170572
hsa:200909
hsa:22953
hsa:23630
hsa:23704
hsa:2554
hsa:2555
hsa:2556
hsa:2557
hsa:2558
hsa:2559
hsa:2560
hsa:2561
hsa:2562
hsa:2563
hsa:2564
hsa:2566
hsa:2567
hsa:2569
hsa:2570
hsa:26251
hsa:27012
hsa:27092
hsa:27094
hsa:27133
hsa:27345
hsa:2741
hsa:2742
hsa:2743
hsa:285242
hsa:2890
hsa:2891
hsa:2892
hsa:2893
hsa:2895
hsa:2897
hsa:2898
hsa:2899
hsa:2900
hsa:2901
hsa:2902
hsa:2903
hsa:2904
hsa:2905
hsa:2906
hsa:3359
hsa:3708
hsa:3710
hsa:3736
hsa:3737
hsa:3738
hsa:3739
hsa:3741
hsa:3742
hsa:3743
hsa:3744
hsa:3745
hsa:3746
hsa:3747
hsa:3748
hsa:3749
hsa:3750
hsa:3751
hsa:3752
hsa:3753
hsa:3754
hsa:3755
hsa:3756
hsa:3757
hsa:3758
hsa:3759
hsa:3760
hsa:3761
hsa:3762
hsa:3763
hsa:3764
hsa:3765
hsa:3766
hsa:3767
hsa:3768
hsa:3769
hsa:3772
hsa:3773
hsa:3775
hsa:3776
hsa:3778
hsa:3779
hsa:3780
hsa:3781
hsa:3782
hsa:3783
hsa:3784
hsa:3785
hsa:3786
hsa:3787
hsa:3788
hsa:3790
hsa:40
hsa:41
hsa:5023
hsa:5024
hsa:5025
hsa:5026
hsa:5027
hsa:50801
hsa:51305
hsa:51802
hsa:5310
hsa:54207
hsa:55503
hsa:55515
hsa:55584
hsa:55799
hsa:55800
hsa:55879
hsa:56479
hsa:56659
hsa:56660
hsa:57053
hsa:57192
hsa:57657
hsa:59284
hsa:60598
hsa:6261
hsa:6262
hsa:6263
hsa:6323
hsa:6324
hsa:6326
hsa:6328
hsa:6329
hsa:6330
hsa:6331
hsa:6332
hsa:6334
hsa:6335
hsa:6336
hsa:6337
hsa:6338
hsa:6339
hsa:6340
hsa:6529
hsa:6530
hsa:6531
hsa:6532
hsa:6534
hsa:6833
hsa:7225
hsa:773
hsa:774
hsa:775
hsa:776
hsa:777
hsa:778
hsa:779
hsa:781
hsa:782
hsa:783
hsa:784
hsa:785
hsa:786
hsa:7881
hsa:8001
hsa:81033
hsa:83795
hsa:8514
hsa:8645
hsa:8911
hsa:8912
hsa:8913
hsa:8973
hsa:89822
hsa:8989
hsa:90134
hsa:9127
hsa:9132
hsa:9177
hsa:9254
hsa:93107
hsa:9311
hsa:9312
hsa:93589
hsa:9424
hsa:9992
hsa:190
hsa:2099
hsa:2100
hsa:2101
hsa:2103
hsa:2104
hsa:2908
hsa:3174
hsa:367
hsa:4306
hsa:5241
hsa:5465
hsa:5468
hsa:5914
hsa:5915
hsa:5916
hsa:6095
hsa:6096
hsa:6097
hsa:6256
hsa:6257
hsa:6258
hsa:7421
hsa:8856
hsa:9970
hsa:9971
Drug-target interaction relationships (enzymes)
hsa:10	D00448
hsa:100	D00037
hsa:100	D00155
hsa:10056	D00021
hsa:10269	D00279
hsa:10279	D00043
hsa:10279	D00160
hsa:10295	D00039
hsa:10295	D00065
hsa:10327	D00136
hsa:10327	D02323
hsa:10461	D01977
hsa:10461	D03218
hsa:10461	D03252
hsa:10461	D04025
hsa:10549	D00217
hsa:10549	D00577
hsa:1056	D01223
hsa:10667	D00021
hsa:107	D00045
hsa:107	D02769
hsa:10747	D00043
hsa:10747	D00160
hsa:10825	D00902
hsa:10846	D00231
hsa:10846	D00371
hsa:10846	D00417
hsa:10846	D00501
hsa:10846	D00528
hsa:10846	D00691
hsa:10846	D01133
hsa:10846	D01198
hsa:10846	D01690
hsa:10846	D01704
hsa:10846	D02008
hsa:10846	D03217
hsa:10858	D00139
hsa:10858	D00225
hsa:10858	D00380
hsa:10858	D00394
hsa:10858	D00410
hsa:10858	D00437
hsa:10858	D00528
hsa:10858	D00542
hsa:10858	D00574
hsa:10858	D01071
hsa:10901	D02335
hsa:10924	D00417
hsa:10924	D00501
hsa:10924	D00528
hsa:10935	D00217
hsa:10935	D00577
hsa:11202	D00043
hsa:11202	D00160
hsa:11238	D00218
hsa:11238	D00340
hsa:11238	D00518
hsa:11238	D00519
hsa:11238	D00538
hsa:11238	D00652
hsa:11238	D00655
hsa:11330	D00160
hsa:11330	D01346
hsa:11343	D01223
hsa:1147	D00448
hsa:116447	D04031
hsa:1178	D01223
hsa:1200	D00043
hsa:1215	D00043
hsa:1215	D00160
hsa:1267	D00417
hsa:1267	D00501
hsa:1267	D00528
hsa:129807	D00902
hsa:13	D01223
hsa:13	D02356
hsa:1312	D00781
hsa:1312	D00786
hsa:132	D00423
hsa:132	D02769
hsa:133121	D00417
hsa:133121	D00501
hsa:133121	D00528
hsa:1360	D00037
hsa:1363	D00052
hsa:1374	D02176
hsa:1376	D02176
hsa:1384	D02176
hsa:1429	D03798
hsa:1431	D00037
hsa:1432	D03736
hsa:1436	D01977
hsa:1436	D03218
hsa:1436	D03252
hsa:1436	D04025
hsa:1504	D00160
hsa:1504	D01346
hsa:151531	D00584
hsa:1543	D00217
hsa:1543	D00225
hsa:1543	D00380
hsa:1543	D00394
hsa:1543	D00437
hsa:1543	D00528
hsa:1543	D00542
hsa:1543	D00569
hsa:1543	D00574
hsa:1543	D00771
hsa:1543	D00960
hsa:1543	D00964
hsa:1543	D01071
hsa:1544	D00139
hsa:1544	D00217
hsa:1544	D00225
hsa:1544	D00283
hsa:1544	D00380
hsa:1544	D00394
hsa:1544	D00410
hsa:1544	D00437
hsa:1544	D00454
hsa:1544	D00528
hsa:1544	D00542
hsa:1544	D00563
hsa:1544	D00569
hsa:1544	D00574
hsa:1544	D00771
hsa:1544	D00960
hsa:1544	D00964
hsa:1544	D01071
hsa:1545	D00139
hsa:1545	D00225
hsa:1545	D00380
hsa:1545	D00394
hsa:1545	D00410
hsa:1545	D00437
hsa:1545	D00528
hsa:1545	D00542
hsa:1545	D00574
hsa:1545	D00960
hsa:1545	D00964
hsa:1545	D01071
hsa:1548	D00139
hsa:1548	D00225
hsa:1548	D00380
hsa:1548	D00394
hsa:1548	D00410
hsa:1548	D00437
hsa:1548	D00528
hsa:1548	D00542
hsa:1548	D00574
hsa:1548	D00960
hsa:1548	D00964
hsa:1548	D01071
hsa:1549	D00139
hsa:1549	D00225
hsa:1549	D00380
hsa:1549	D00394
hsa:1549	D00410
hsa:1549	D00437
hsa:1549	D00542
hsa:1549	D00574
hsa:1549	D00771
hsa:1549	D00960
hsa:1549	D00964
hsa:1549	D01071
hsa:1549	D03365
hsa:1551	D00139
hsa:1551	D00225
hsa:1551	D00380
hsa:1551	D00394
hsa:1551	D00410
hsa:1551	D00437
hsa:1551	D00528
hsa:1551	D00542
hsa:1551	D00574
hsa:1551	D00960
hsa:1551	D00964
hsa:1551	D01071
hsa:1553	D00139
hsa:1553	D00225
hsa:1553	D00380
hsa:1553	D00394
hsa:1553	D00410
hsa:1553	D00437
hsa:1553	D00528
hsa:1553	D00542
hsa:1553	D00574
hsa:1553	D00960
hsa:1553	D00964
hsa:1553	D01071
hsa:1553	D03365
hsa:1555	D00139
hsa:1555	D00225
hsa:1555	D00380
hsa:1555	D00394
hsa:1555	D00410
hsa:1555	D00437
hsa:1555	D00528
hsa:1555	D00542
hsa:1555	D00574
hsa:1555	D00960
hsa:1555	D00964
hsa:1555	D01071
hsa:1557	D00139
hsa:1557	D00225
hsa:1557	D00283
hsa:1557	D00293
hsa:1557	D00322
hsa:1557	D00380
hsa:1557	D00394
hsa:1557	D00410
hsa:1557	D00416
hsa:1557	D00437
hsa:1557	D00512
hsa:1557	D00528
hsa:1557	D00533
hsa:1557	D00536
hsa:1557	D00542
hsa:1557	D00574
hsa:1557	D00960
hsa:1557	D00964
hsa:1557	D01071
hsa:1557	D05353
hsa:1558	D00139
hsa:1558	D00225
hsa:1558	D00252
hsa:1558	D00380
hsa:1558	D00394
hsa:1558	D00410
hsa:1558	D00437
hsa:1558	D00528
hsa:1558	D00542
hsa:1558	D00574
hsa:1558	D00960
hsa:1558	D00964
hsa:1558	D01071
hsa:1558	D02356
hsa:1558	D05341
hsa:1559	D00126
hsa:1559	D00139
hsa:1559	D00225
hsa:1559	D00322
hsa:1559	D00380
hsa:1559	D00394
hsa:1559	D00410
hsa:1559	D00416
hsa:1559	D00512
hsa:1559	D00528
hsa:1559	D00542
hsa:1559	D00567
hsa:1559	D00574
hsa:1559	D00593
hsa:1559	D00960
hsa:1559	D00964
hsa:1559	D01071
hsa:1559	D05353
hsa:1562	D00139
hsa:1562	D00225
hsa:1562	D00380
hsa:1562	D00394
hsa:1562	D00410
hsa:1562	D00437
hsa:1562	D00528
hsa:1562	D00542
hsa:1562	D00574
hsa:1562	D00960
hsa:1562	D00964
hsa:1562	D01071
hsa:1565	D00139
hsa:1565	D00217
hsa:1565	D00225
hsa:1565	D00234
hsa:1565	D00274
hsa:1565	D00283
hsa:1565	D00300
hsa:1565	D00380
hsa:1565	D00394
hsa:1565	D00410
hsa:1565	D00437
hsa:1565	D00454
hsa:1565	D00503
hsa:1565	D00521
hsa:1565	D00528
hsa:1565	D00542
hsa:1565	D00563
hsa:1565	D00574
hsa:1565	D00960
hsa:1565	D00964
hsa:1565	D01071
hsa:1565	D01164
hsa:1565	D02342
hsa:1565	D02671
hsa:1571	D00131
hsa:1571	D00139
hsa:1571	D00217
hsa:1571	D00225
hsa:1571	D00380
hsa:1571	D00394
hsa:1571	D00410
hsa:1571	D00437
hsa:1571	D00528
hsa:1571	D00543
hsa:1571	D00544
hsa:1571	D00547
hsa:1571	D00574
hsa:1571	D00771
hsa:1571	D00960
hsa:1571	D00964
hsa:1571	D01071
hsa:1572	D00139
hsa:1572	D00225
hsa:1572	D00380
hsa:1572	D00394
hsa:1572	D00410
hsa:1572	D00437
hsa:1572	D00528
hsa:1572	D00542
hsa:1572	D00574
hsa:1572	D00960
hsa:1572	D00964
hsa:1572	D01071
hsa:1573	D00139
hsa:1573	D00225
hsa:1573	D00380
hsa:1573	D00394
hsa:1573	D00410
hsa:1573	D00437
hsa:1573	D00528
hsa:1573	D00542
hsa:1573	D00574
hsa:1573	D00960
hsa:1573	D00964
hsa:1573	D01071
hsa:1576	D00136
hsa:1576	D00139
hsa:1576	D00225
hsa:1576	D00234
hsa:1576	D00252
hsa:1576	D00274
hsa:1576	D00283
hsa:1576	D00293
hsa:1576	D00364
hsa:1576	D00380
hsa:1576	D00387
hsa:1576	D00394
hsa:1576	D00410
hsa:1576	D00434
hsa:1576	D00437
hsa:1576	D00503
hsa:1576	D00521
hsa:1576	D00528
hsa:1576	D00542
hsa:1576	D00550
hsa:1576	D00563
hsa:1576	D00574
hsa:1576	D00960
hsa:1576	D00964
hsa:1576	D01071
hsa:1576	D02356
hsa:1576	D05353
hsa:1577	D00139
hsa:1577	D00225
hsa:1577	D00380
hsa:1577	D00394
hsa:1577	D00410
hsa:1577	D00437
hsa:1577	D00528
hsa:1577	D00542
hsa:1577	D00574
hsa:1577	D00960
hsa:1577	D00964
hsa:1577	D01071
hsa:1579	D00139
hsa:1579	D00225
hsa:1579	D00380
hsa:1579	D00394
hsa:1579	D00410
hsa:1579	D00437
hsa:1579	D00528
hsa:1579	D00542
hsa:1579	D00574
hsa:1579	D01071
hsa:1580	D00139
hsa:1580	D00225
hsa:1580	D00380
hsa:1580	D00394
hsa:1580	D00410
hsa:1580	D00437
hsa:1580	D00528
hsa:1580	D00542
hsa:1580	D00574
hsa:1580	D00960
hsa:1580	D00964
hsa:1580	D01071
hsa:1581	D00139
hsa:1581	D00225
hsa:1581	D00380
hsa:1581	D00394
hsa:1581	D00410
hsa:1581	D00437
hsa:1581	D00528
hsa:1581	D00542
hsa:1581	D00574
hsa:1581	D01071
hsa:1582	D00139
hsa:1582	D00225
hsa:1582	D00380
hsa:1582	D00394
hsa:1582	D00410
hsa:1582	D00437
hsa:1582	D00528
hsa:1582	D00542
hsa:1582	D00574
hsa:1582	D01071
hsa:1583	D00139
hsa:1583	D00225
hsa:1583	D00380
hsa:1583	D00394
hsa:1583	D00437
hsa:1583	D00528
hsa:1583	D00542
hsa:1583	D00574
hsa:1583	D01071
hsa:1584	D00139
hsa:1584	D00225
hsa:1584	D00380
hsa:1584	D00394
hsa:1584	D00410
hsa:1584	D00437
hsa:1584	D00528
hsa:1584	D00542
hsa:1584	D00574
hsa:1584	D01071
hsa:1585	D00139
hsa:1585	D00225
hsa:1585	D00380
hsa:1585	D00394
hsa:1585	D00528
hsa:1585	D00542
hsa:1585	D00574
hsa:1585	D01071
hsa:1586	D00139
hsa:1586	D00225
hsa:1586	D00380
hsa:1586	D00394
hsa:1586	D00410
hsa:1586	D00437
hsa:1586	D00528
hsa:1586	D00542
hsa:1586	D00574
hsa:1586	D01071
hsa:1588	D00139
hsa:1588	D00153
hsa:1588	D00225
hsa:1588	D00380
hsa:1588	D00394
hsa:1588	D00410
hsa:1588	D00437
hsa:1588	D00528
hsa:1588	D00542
hsa:1588	D00574
hsa:1588	D00960
hsa:1588	D00963
hsa:1588	D00964
hsa:1588	D01071
hsa:1589	D00139
hsa:1589	D00225
hsa:1589	D00380
hsa:1589	D00394
hsa:1589	D00410
hsa:1589	D00437
hsa:1589	D00528
hsa:1589	D00542
hsa:1589	D01071
hsa:1593	D00139
hsa:1593	D00188
hsa:1593	D00225
hsa:1593	D00380
hsa:1593	D00394
hsa:1593	D00410
hsa:1593	D00437
hsa:1593	D00528
hsa:1593	D00542
hsa:1593	D00574
hsa:1593	D01071
hsa:1594	D00129
hsa:1594	D00139
hsa:1594	D00187
hsa:1594	D00225
hsa:1594	D00380
hsa:1594	D00394
hsa:1594	D00410
hsa:1594	D00437
hsa:1594	D00528
hsa:1594	D00542
hsa:1594	D00574
hsa:1594	D01071
hsa:1595	D00139
hsa:1595	D00225
hsa:1595	D00380
hsa:1595	D00394
hsa:1595	D00410
hsa:1595	D00437
hsa:1595	D00528
hsa:1595	D00542
hsa:1595	D00574
hsa:1595	D01071
hsa:1595	D02556
hsa:1610	D00038
hsa:1621	D00131
hsa:1633	D02368
hsa:1636	D00198
hsa:1636	D00251
hsa:1636	D00383
hsa:1636	D00421
hsa:1636	D01900
hsa:1636	D03077
hsa:1636	D03440
hsa:1636	D03752
hsa:1636	D03753
hsa:1636	D03758
hsa:1636	D03760
hsa:1636	D03763
hsa:1636	D03772
hsa:1636	D03773
hsa:1636	D03775
hsa:1645	D00136
hsa:1675	D00043
hsa:1675	D00160
hsa:1719	D00142
hsa:1719	D00145
hsa:1719	D00488
hsa:1719	D06238
hsa:1728	D00208
hsa:1728	D03798
hsa:1733	D00217
hsa:1733	D00401
hsa:1733	D00562
hsa:1733	D00577
hsa:1734	D00217
hsa:1734	D00401
hsa:1734	D00562
hsa:1734	D00577
hsa:1735	D00217
hsa:1735	D00401
hsa:1735	D00562
hsa:1735	D00577
hsa:18	D00332
hsa:18	D00535
hsa:1803	D00043
hsa:1806	D00027
hsa:1806	D00584
hsa:189	D00369
hsa:1890	D01223
hsa:1956	D01977
hsa:1956	D03218
hsa:1956	D03252
hsa:1956	D04025
hsa:1969	D01977
hsa:1969	D03218
hsa:1969	D03252
hsa:1969	D04025
hsa:1990	D00160
hsa:1991	D00160
hsa:1991	D03788
hsa:199974	D00139
hsa:199974	D00225
hsa:199974	D00380
hsa:199974	D00394
hsa:199974	D00410
hsa:199974	D00437
hsa:199974	D00528
hsa:199974	D00542
hsa:199974	D00574
hsa:199974	D00960
hsa:199974	D00964
hsa:199974	D01071
hsa:2041	D01977
hsa:2041	D03218
hsa:2041	D03252
hsa:2041	D04025
hsa:2042	D01977
hsa:2042	D03218
hsa:2042	D03252
hsa:2042	D04025
hsa:2043	D01977
hsa:2043	D03218
hsa:2043	D03252
hsa:2043	D04025
hsa:2044	D01977
hsa:2044	D03218
hsa:2044	D03252
hsa:2044	D04025
hsa:2045	D01977
hsa:2045	D03218
hsa:2045	D03252
hsa:2045	D04025
hsa:2046	D01977
hsa:2046	D03218
hsa:2046	D03252
hsa:2046	D04025
hsa:2047	D01977
hsa:2047	D03218
hsa:2047	D03252
hsa:2047	D04025
hsa:2048	D01977
hsa:2048	D03218
hsa:2048	D03252
hsa:2048	D04025
hsa:2049	D01977
hsa:2049	D03218
hsa:2049	D03252
hsa:2049	D04025
hsa:2050	D01977
hsa:2050	D03218
hsa:2050	D03252
hsa:2050	D04025
hsa:2051	D01977
hsa:2051	D03218
hsa:2051	D03252
hsa:2051	D04025
hsa:2058	D00035
hsa:2064	D01977
hsa:2064	D03218
hsa:2064	D03252
hsa:2064	D04025
hsa:2065	D01977
hsa:2065	D03218
hsa:2065	D03252
hsa:2065	D04025
hsa:2066	D01977
hsa:2066	D03218
hsa:2066	D03252
hsa:2066	D04025
hsa:2098	D00043
hsa:2098	D01223
hsa:2135	D01828
hsa:2147	D00270
hsa:2147	D00494
hsa:2147	D00560
hsa:2147	D00733
hsa:2147	D01981
hsa:2147	D02335
hsa:2155	D00043
hsa:2155	D00160
hsa:2155	D02335
hsa:2158	D00043
hsa:2158	D00160
hsa:2158	D02335
hsa:2159	D00043
hsa:2159	D00160
hsa:2159	D02335
hsa:216	D00094
hsa:216	D00131
hsa:2160	D00043
hsa:2160	D00160
hsa:2161	D00043
hsa:2161	D00160
hsa:217	D00131
hsa:218	D00131
hsa:2180	D02769
hsa:219	D00131
hsa:2193	D00021
hsa:223	D00131
hsa:224	D00131
hsa:225689	D03736
hsa:2260	D01977
hsa:2260	D03218
hsa:2260	D03252
hsa:2260	D04025
hsa:2261	D01977
hsa:2261	D03218
hsa:2261	D03252
hsa:2261	D04025
hsa:2263	D01977
hsa:2263	D03218
hsa:2263	D03252
hsa:2263	D04025
hsa:2264	D01977
hsa:2264	D03218
hsa:2264	D03252
hsa:2264	D04025
hsa:22954	D00283
hsa:22954	D00451
hsa:22954	D00513
hsa:22954	D00726
hsa:22978	D00423
hsa:22978	D00501
hsa:231	D00037
hsa:231	D00136
hsa:231	D01688
hsa:231	D01715
hsa:231	D01842
hsa:231	D02323
hsa:231	D02328
hsa:231	D03805
hsa:231	D03806
hsa:231	D03807
hsa:2321	D01977
hsa:2321	D03218
hsa:2321	D03252
hsa:2321	D04025
hsa:2322	D01977
hsa:2322	D03218
hsa:2322	D03252
hsa:2322	D04025
hsa:23236	D00417
hsa:23236	D00501
hsa:23236	D00528
hsa:2324	D01977
hsa:2324	D03218
hsa:2324	D03252
hsa:2324	D04025
hsa:2326	D00401
hsa:2328	D00120
hsa:2328	D00401
hsa:2328	D03365
hsa:2339	D03720
hsa:2342	D03720
hsa:23430	D00043
hsa:23430	D00160
hsa:23436	D00043
hsa:23436	D00160
hsa:23475	D00049
hsa:2356	D00070
hsa:23632	D00218
hsa:23632	D00340
hsa:23632	D00518
hsa:23632	D00519
hsa:23632	D00538
hsa:23632	D00652
hsa:23632	D00655
hsa:238	D01977
hsa:238	D03218
hsa:238	D03252
hsa:238	D04025
hsa:239	D00097
hsa:239	D00118
hsa:239	D00126
hsa:239	D00132
hsa:239	D00141
hsa:239	D00448
hsa:239	D00510
hsa:240	D00097
hsa:240	D00118
hsa:240	D00126
hsa:240	D00132
hsa:240	D00141
hsa:240	D00377
hsa:240	D00414
hsa:240	D00448
hsa:240	D00510
hsa:240	D03882
hsa:242	D00097
hsa:242	D00118
hsa:242	D00126
hsa:242	D00132
hsa:242	D00141
hsa:242	D00448
hsa:242	D00510
hsa:246	D00097
hsa:246	D00118
hsa:246	D00132
hsa:246	D00141
hsa:246	D00448
hsa:246	D00510
hsa:247	D00097
hsa:247	D00118
hsa:247	D00132
hsa:247	D00141
hsa:247	D00448
hsa:247	D00510
hsa:2548	D00216
hsa:2548	D00625
hsa:2548	D01665
hsa:25796	D01223
hsa:25824	D00038
hsa:25824	D00217
hsa:25824	D00577
hsa:2595	D00216
hsa:2595	D00625
hsa:2595	D01665
hsa:260293	D00139
hsa:260293	D00225
hsa:260293	D00380
hsa:260293	D00394
hsa:260293	D00410
hsa:260293	D00437
hsa:260293	D00528
hsa:260293	D00542
hsa:260293	D00574
hsa:260293	D00960
hsa:260293	D00964
hsa:260293	D01071
hsa:26279	D01223
hsa:2638	D02315
hsa:2673	D00332
hsa:2677	D00148
hsa:2677	D02335
hsa:270	D02769
hsa:27032	D00542
hsa:27032	D00543
hsa:27032	D00544
hsa:27032	D00545
hsa:27032	D00546
hsa:27032	D00547
hsa:27034	D00039
hsa:27115	D00231
hsa:27115	D00371
hsa:27115	D00417
hsa:27115	D00501
hsa:27115	D00528
hsa:27115	D00691
hsa:27115	D01133
hsa:27115	D01198
hsa:27115	D01690
hsa:27115	D01704
hsa:27115	D02008
hsa:27115	D03217
hsa:2746	D00007
hsa:2766	D03798
hsa:279	D00216
hsa:279	D00625
hsa:279	D01346
hsa:28	D00222
hsa:28	D00317
hsa:28	D00884
hsa:2806	D00332
hsa:2822	D00417
hsa:2822	D00501
hsa:2822	D00528
hsa:284541	D00139
hsa:284541	D00225
hsa:284541	D00380
hsa:284541	D00394
hsa:284541	D00410
hsa:284541	D00437
hsa:284541	D00528
hsa:284541	D00542
hsa:284541	D00574
hsa:284541	D01071
hsa:2876	D00577
hsa:2877	D00577
hsa:2878	D00577
hsa:2879	D00577
hsa:2882	D00577
hsa:28972	D00043
hsa:28972	D00160
hsa:2936	D00014
hsa:2950	D00014
hsa:29785	D00139
hsa:29785	D00225
hsa:29785	D00380
hsa:29785	D00394
hsa:29785	D00410
hsa:29785	D00437
hsa:29785	D00528
hsa:29785	D00542
hsa:29785	D00574
hsa:29785	D00960
hsa:29785	D00964
hsa:29785	D01071
hsa:29920	D00035
hsa:29968	D00332
hsa:30	D00222
hsa:30	D00317
hsa:30	D00333
hsa:30	D00342
hsa:30	D00391
hsa:30	D05407
hsa:3001	D00043
hsa:3001	D00160
hsa:3002	D00043
hsa:3002	D00160
hsa:3034	D00032
hsa:3035	D00032
hsa:306	D00417
hsa:306	D00501
hsa:306	D00528
hsa:3067	D00032
hsa:30814	D01223
hsa:30833	D00501
hsa:31	D00007
hsa:31	D00027
hsa:31	D00029
hsa:313	D01223
hsa:3141	D00029
hsa:3156	D00359
hsa:3156	D00434
hsa:3156	D03601
hsa:3156	D03643
hsa:32	D00029
hsa:327	D00043
hsa:3283	D01180
hsa:3290	D00410
hsa:3291	D00410
hsa:3376	D00065
hsa:339221	D00417
hsa:339221	D00501
hsa:339221	D00528
hsa:3416	D00052
hsa:3480	D01977
hsa:3480	D03218
hsa:3480	D03252
hsa:3480	D04025
hsa:353	D02769
hsa:354	D00043
hsa:354	D00160
hsa:3551	D00097
hsa:3551	D00120
hsa:3551	D00448
hsa:36	D00065
hsa:3612	D00501
hsa:3614	D00423
hsa:3614	D00752
hsa:3615	D00752
hsa:3643	D01977
hsa:3643	D03218
hsa:3643	D03252
hsa:3643	D04025
hsa:3643	D04966
hsa:3645	D01977
hsa:3645	D03218
hsa:3645	D03252
hsa:3645	D04025
hsa:3645	D04966
hsa:3735	D02304
hsa:377677	D00218
hsa:377677	D00340
hsa:377677	D00518
hsa:377677	D00519
hsa:377677	D00538
hsa:377677	D00652
hsa:377677	D00655
hsa:3791	D01977
hsa:3791	D03218
hsa:3791	D03252
hsa:3791	D04025
hsa:38	D00065
hsa:38	D00448
hsa:3815	D01977
hsa:3815	D03218
hsa:3815	D03252
hsa:3815	D04025
hsa:3816	D00043
hsa:3816	D00160
hsa:3817	D00043
hsa:3817	D00160
hsa:3818	D00043
hsa:3818	D00160
hsa:3906	D00126
hsa:3906	D00132
hsa:3906	D00293
hsa:3906	D00510
hsa:3990	D01223
hsa:3991	D01223
hsa:4017	D00270
hsa:4023	D00279
hsa:4023	D01223
hsa:4025	D00097
hsa:4025	D00217
hsa:4025	D00562
hsa:4025	D00577
hsa:4048	D00097
hsa:4048	D00118
hsa:4048	D00126
hsa:4048	D00132
hsa:4048	D00141
hsa:4048	D00448
hsa:4048	D00510
hsa:4051	D00139
hsa:4051	D00225
hsa:4051	D00380
hsa:4051	D00394
hsa:4051	D00410
hsa:4051	D00437
hsa:4051	D00528
hsa:4051	D00542
hsa:4051	D00574
hsa:4051	D01071
hsa:4058	D01977
hsa:4058	D03218
hsa:4058	D03252
hsa:4058	D04025
hsa:4128	D00270
hsa:4128	D00947
hsa:4128	D02559
hsa:4128	D02560
hsa:4128	D02561
hsa:4128	D02563
hsa:4128	D02579
hsa:4128	D02580
hsa:4128	D02581
hsa:4128	D03731
hsa:4129	D00270
hsa:4129	D02559
hsa:4129	D02560
hsa:4129	D02561
hsa:4129	D02563
hsa:4129	D02579
hsa:4129	D02580
hsa:4129	D02581
hsa:4129	D03731
hsa:4129	D05458
hsa:4143	D04983
hsa:4191	D00037
hsa:4200	D02308
hsa:4233	D01977
hsa:4233	D03218
hsa:4233	D03252
hsa:4233	D04025
hsa:4282	D00037
hsa:43	D00043
hsa:43	D00196
hsa:43	D00805
hsa:43	D01223
hsa:43	D03822
hsa:43	D03823
[truncated: 2,276 more rows]
