# Supplementary material for: A Systematic Prediction of Multiple Drug-Target Interactions from Chemical, Genomic, and Pharmacological Data
Source: PLoS One. 2012 May 30;7(5):e37608. doi: 10.1371/journal.pone.0037608 (PMC3364341; doi:10.1371/journal.pone.0037608)
Supplement: Supporting Information S13 — The predicted drugs for Thymidine kinase by RF Model III. (XLSX) [file pone.0037608.s013.xlsx]

## Sheet: Sheet1
Table S11. The predicted drugs for Thymidine kinase by RF Model III
Predicted class	Positive probability	Negative probability	Drug DrugBank ID	Drug generic name
1	0.87	0.13	DB00157	NADH
1	0.848	0.152	DB01907	Nicotinamide-Adenine-Dinucleotide
1	0.844	0.156	DB03431	Adenosine-5'-Diphosphate
1	0.808	0.192	DB04315	Guanosine-5'-Diphosphate
1	0.804	0.196	DB03461	2'-Monophosphoadenosine 5'-Diphosphoribose
1	0.792	0.208	DB04184	Acetate Ion
1	0.786	0.214	DB02577	Mesoheme
1	0.786	0.214	DB03014	Heme
1	0.778	0.222	DB02332	Flavin-N7 Protonated-Adenine Dinucleotide
1	0.778	0.222	DB03147	Flavin-Adenine Dinucleotide
1	0.778	0.222	DB04099	Deamido-Nad+
1	0.762	0.238	DB00249	Idoxuridine
1	0.754	0.246	DB01942	Formic Acid
1	0.75	0.25	DB03020	5-Beta-D-Ribofuranosylnicotinamide Adenine Dinucleotide
1	0.748	0.252	DB01992	Coenzyme A
1	0.748	0.252	DB03166	Acetic acid
1	0.746	0.254	DB00171	Adenosine triphosphate
1	0.746	0.254	DB02623	Aminophosphonic Acid-Guanylate Ester
1	0.744	0.256	DB03280	P1-(5'-Adenosyl)P5-(5'-Thymidyl)Pentaphosphate
1	0.736	0.264	DB02379	Beta-D-Glucose
1	0.736	0.264	DB02687	Beta-D-Mannose
1	0.736	0.264	DB02944	Alpha-D-Mannose
1	0.736	0.264	DB03989	D-Allopyranose
1	0.736	0.264	DB04395	Phosphoaminophosphonic Acid-Adenylate Ester
1	0.732	0.268	DB00194	Vidarabine
1	0.732	0.268	DB00299	Penciclovir
1	0.732	0.268	DB00640	Adenosine
1	0.732	0.268	DB03778	5-Iododeoxyuridine
1	0.73	0.27	DB03122	B-Octylglucoside
1	0.728	0.272	DB03363	3-Acetylpyridine Adenine Dinucleotide
1	0.724	0.276	DB00577	Valaciclovir
1	0.718	0.282	DB02325	Isopropyl Alcohol
1	0.718	0.282	DB04402	2-Propanol, Isopropanol
1	0.716	0.284	DB00145	Glycine
1	0.716	0.284	DB01860	Cordycepin Triphosphate
1	0.716	0.284	DB02736	Acetamide
1	0.716	0.284	DB03131	Beta-Mercaptoethanol
1	0.716	0.284	DB03345	2-Sulfhydryl-Ethanol
1	0.712	0.288	DB01643	Thymidine-5'-Phosphate
1	0.71	0.29	DB03152	B-2-Octylglucoside
1	0.71	0.29	DB03317	Heme C
1	0.71	0.29	DB04485	Deoxythymidine
1	0.706	0.294	DB00787	Aciclovir
1	0.706	0.294	DB01730	9-(4-Hydroxy-3-(Hydroxymethyl)but-1-Yl)Guanine
1	0.704	0.296	DB01004	Ganciclovir
1	0.704	0.296	DB07923	octyl alpha-L-altropyranoside
1	0.704	0.296	DB07924	octyl beta-D-galactopyranoside
1	0.702	0.298	DB01265	Telbivudine
1	0.702	0.298	DB04071	Cpad
1	0.702	0.298	DB04366	3'-Deoxy 3'-Amino Adenosine-5'-Diphosphate
1	0.7	0.3	DB03085	Hydroxyacetic Acid
1	0.7	0.3	DB03800	2'-deoxyuridylic acid
1	0.7	0.3	DB04137	Guanosine-5'-Triphosphate
1	0.698	0.302	DB01960	7n-Methyl-8-Hydroguanosine-5'-Diphosphate
1	0.698	0.302	DB07378	4-AMINO-2-OCTYLOXY-6-HYDROXYMETHYL-TETRAHYDRO-PYRAN-3,5-DIOL
1	0.694	0.306	DB03226	Trifluoroethanol
1	0.692	0.308	DB02324	5-Iodo-2'-Deoxyuridine-5'-Monophosphate
1	0.692	0.308	DB03564	(4r)-2-Methylpentane-2,4-Diol
1	0.692	0.308	DB03684	2-Methyl-2,4-Pentanediol
1	0.69	0.31	DB02732	Nicotinamide Adenine Dinucleotide Acetone Adduct
1	0.688	0.312	DB00114	Pyridoxal Phosphate
1	0.688	0.312	DB01752	S-Adenosyl-L-Homocysteine
1	0.688	0.312	DB03233	Phosphoric Acid Mono-[3-Amino-5-(5-Methyl-2,4-Dioxo-3,4-Dihydro-2h-Pyrimidin-1-Yl)-Tetrahydro-Furan-2-Ylmethyl] Ester
1	0.686	0.314	DB01763	Tatp
1	0.686	0.314	DB03761	5-Fluoro-2'-Deoxyuridine-5'-Monophosphate
1	0.686	0.314	DB04147	Lauryl Dimethylamine-N-Oxide
1	0.684	0.316	DB00322	Floxuridine
1	0.684	0.316	DB00551	Acetohydroxamic Acid
1	0.684	0.316	DB02363	2'-Monophosphoadenosine-5'-Diphosphate
1	0.684	0.316	DB02431	Cytidine-5'-Triphosphate
1	0.684	0.316	DB03527	Nicotinamide-Adenine-Dinucleotide (Acidic Form)
1	0.682	0.318	DB03222	2'-Deoxyadenosine 5'-Triphosphate
1	0.68	0.32	DB02456	Cytosine Arabinose-5'-Phosphate
1	0.68	0.32	DB03403	Cytidine-5'-Monophosphate
1	0.68	0.32	DB04272	Citric Acid
1	0.68	0.32	DB04399	Cacodylate Ion
1	0.678	0.322	DB00131	Adenosine monophosphate
1	0.678	0.322	DB01812	Adenosine-3'-5'-Diphosphate
1	0.678	0.322	DB01972	Guanosine-5'-Monophosphate
1	0.678	0.322	DB02059	Adenosine-5-Diphosphoribose
1	0.678	0.322	DB02181	2'-Deoxyguanosine-5'-Triphosphate
1	0.678	0.322	DB03312	5-Bromovinyldeoxyuridine
1	0.676	0.324	DB00142	L-Glutamic Acid
1	0.676	0.324	DB01629	5-Fluorouridine
1	0.676	0.324	DB02502	8-Hydroxy-2'-Deoxyguanosine
1	0.676	0.324	DB03763	5-Methyl-2'-Deoxypseudouridine
1	0.674	0.326	DB01903	5-Bromo-2'-Deoxyuridine-5'-Monophosphate
1	0.674	0.326	DB02256	2'-Deoxyuridine
1	0.672	0.328	DB02753	Selenoinosine
1	0.672	0.328	DB03258	2'-Deoxycytidine-5'-Triphosphate
1	0.67	0.33	DB02679	Cyanamide
1	0.67	0.33	DB03798	2'-Deoxycytidine-5'-Monophosphate
1	0.67	0.33	DB04280	((2r,3s,5r)-3-Hydroxy-5-(4-Hydroxy-2-Oxo-3,4-Dihydropyrimidin-1(2h)-Yl)-Tetrahydrofuran-2-Yl)Methyldihydrogen Phosphate
1	0.668	0.332	DB01093	Dimethyl sulfoxide
1	0.668	0.332	DB02189	2',3'-Dideoxyadenosine-5'-Triphosphate
1	0.668	0.332	DB02451	B-Nonylglucoside
1	0.668	0.332	DB03685	Uridine-5'-Monophosphate
1	0.668	0.332	DB04555	Cytidine-5'-Diphosphate
1	0.666	0.334	DB01262	Decitabine
1	0.666	0.334	DB01693	Ribavirin Monophosphate
1	0.666	0.334	DB01864	5'-Guanosine-Diphosphate-Monothiophosphate
1	0.666	0.334	DB02082	Phosphoaminophosphonic Acid Guanylate Ester
1	0.666	0.334	DB03845	P1-(5'-Adenosyl)P5-(5'-(3'azido-3'-Deoxythymidyl))Pentaphosphate
1	0.666	0.334	DB04343	Glyoxalate, Glyoxylate
1	0.664	0.336	DB02994	Hydroxydimethylarsine Oxide
1	0.664	0.336	DB03708	Adenosine-5'-Phosphosulfate
1	0.662	0.338	DB00119	Pyruvic acid
1	0.662	0.338	DB02338	Nadph Dihydro-Nicotinamide-Adenine-Dinucleotidephosphate
1	0.662	0.338	DB02607	Adenosine Phosphonoacetic Acid
1	0.662	0.338	DB02857	Guanosine
1	0.662	0.338	DB03273	3'-Oxo-Adenosine
1	0.662	0.338	DB03528	9-Beta-D-Xylofuranosyl-Adenine
1	0.66	0.34	DB03247	Riboflavin Monophosphate
1	0.658	0.342	DB01660	Adenosine-5'-Diphosphate Monothiophosphate
1	0.658	0.342	DB02182	Hybrid Between B and C Type Hemes (Protoporphyrin Ixcontaining Fe)
1	0.658	0.342	DB02281	Formycin
1	0.658	0.342	DB02452	Thymidine-5'-Triphosphate
1	0.658	0.342	DB03150	2',3'-Dideoxythymidine-5'-Monophosphate
1	0.658	0.342	DB03435	Uridine-5'-Diphosphate
1	0.658	0.342	DB03587	Pyruvoyl Group
1	0.658	0.342	DB04198	Formycin B
1	0.658	0.342	DB04243	5-Methyluridine 5'-Monophosphate
1	0.656	0.344	DB00552	Pentostatin
1	0.656	0.344	DB02646	Nitrosoethane
1	0.656	0.344	DB03486	Phosphomethylphosphonic Acid Guanosyl Ester
1	0.656	0.344	DB03592	Pterin-6-Yl-Methyl-Monophosphate
1	0.656	0.344	DB03726	Purine Riboside-5'-Monophosphate
1	0.656	0.344	DB03814	2-(N-Morpholino)-Ethanesulfonic Acid
1	0.656	0.344	DB04425	7,8-Dihydroneopterin
1	0.656	0.344	DB08432	THYMIDINE-5'-THIOPHOSPHATE
1	0.654	0.346	DB00432	Trifluridine
1	0.654	0.346	DB03902	Oxalic Acid
1	0.654	0.346	DB03948	6-Chloropurine Riboside, 5'-Monophosphate
1	0.654	0.346	DB04261	Carbamic Acid
1	0.652	0.348	DB00928	Azacitidine
1	0.652	0.348	DB01700	Aicar
1	0.652	0.348	DB02765	9-Hydroxypropyladenine, R-Isomer
1	0.652	0.348	DB03000	9-Hydroxypropyladenine, S-Isomer
1	0.652	0.348	DB03716	5'-Fluoro-5'-Deoxyadenosine
1	0.65	0.35	DB02472	6-Hydroxy-7,8-Dihydro Purine Nucleoside
1	0.65	0.35	DB02596	Alpha,Beta-Methyleneadenosine-5'-Triphosphate
1	0.65	0.35	DB02745	Uridine
1	0.65	0.35	DB02831	Dihydrogenphosphate Ion
1	0.65	0.35	DB03769	D-Eritadenine
1	0.65	0.35	DB03829	Pseudouridine-5'-Monophosphate
1	0.65	0.35	DB04566	Inosinic Acid
1	0.65	0.35	DB04672	cyclic 3',5'-thymidine monophosphate
1	0.648	0.352	DB01995	5-Methylcytidine-5'-Monophosphate
1	0.648	0.352	DB02796	9-Deazainosine
1	0.648	0.352	DB02890	6-Hydroxyuridine-5'-Phosphate
1	0.646	0.354	DB00242	Cladribine
1	0.646	0.354	DB00441	Gemcitabine
1	0.646	0.354	DB03718	6-Aza-Ump
1	0.646	0.354	DB03940	Oxamic Acid
1	0.646	0.354	DB04005	Uridine 5'-Triphosphate
1	0.646	0.354	DB04060	(5-Methyl-6-Oxo-1,6-Dihydro-Pyridin-3-Yl)-1,2-Dideoxy-Ribofuranose-5-Monophosphate
1	0.646	0.354	DB04102	2-Amino-Adenosine
1	0.644	0.356	DB00442	Entecavir
1	0.644	0.356	DB00987	Cytarabine
1	0.644	0.356	DB02023	8-Oxo-2'-Deoxy-Guanosine-5'-Monophosphate
1	0.644	0.356	DB02097	Cytidine
1	0.644	0.356	DB02199	1,3-Dedimethyl-1,3-Divinyl Heme
1	0.644	0.356	DB02454	5-(6-Amino-9h-Purin-9-Yl)-4-Hydroxytetrahydrofuran-3-Yl Dihydrogen Phosphate
1	0.644	0.356	DB02517	D-Glutamic Acid
1	0.644	0.356	DB02569	2',3'-Dehydro-2',3'-Deoxy-Thymidine 5'-Diphosphate
1	0.644	0.356	DB02594	2'-Deoxycytidine
1	0.644	0.356	DB02770	7-Alpha-D-Ribofuranosyl-2-Aminopurine-5'-Phosphate
1	0.644	0.356	DB02883	2',3'-Dideoxycytidine-5'-Monophosphate
1	0.644	0.356	DB02930	Phosphothiophosphoric Acid-Adenylate Ester
1	0.644	0.356	DB03015	6-Hydroxy-1,6-Dihydro Purine Nucleoside
1	0.644	0.356	DB03338	Heptyl-Beta-D-Glucopyranoside
1	0.644	0.356	DB03666	3'-Azido-3'-Deoxythymidine-5'-Monophosphate
1	0.644	0.356	DB04440	Purine Riboside
1	0.644	0.356	DB04627	Cyclouridine
1	0.642	0.358	DB01694	D-tartaric acid
1	0.642	0.358	DB02737	Oxalate Ion
1	0.642	0.358	DB03609	3-Deoxyguanosine
1	0.642	0.358	DB03776	Lactaldehyde
1	0.642	0.358	DB04139	6-Hydroxypropylthymine
1	0.642	0.358	DB05248	5-bromo-cytidinemonophosphate
1	0.64	0.36	DB00495	Zidovudine
1	0.64	0.36	DB00811	Ribavirin
1	0.64	0.36	DB02441	2-Butyl-5,6-Dihydro-1h-Imidazo[4,5-D]Pyridazine-4,7-Dione
1	0.64	0.36	DB02716	7-Methyl-Guanosine-5'-Triphosphate
1	0.64	0.36	DB02905	Phosphoric Acid Mono-[3,4-Dihydroxy-5-(5-Hydroxy-Benzoimidazol-1-Yl)Tetrahydro-Furan-2-Ylmethyl] Ester
1	0.64	0.36	DB03491	2'-Deoxyguanosine-5'-Diphosphate
1	0.64	0.36	DB04141	2-Hexyloxy-6-Hydroxymethyl-Tetrahydro-Pyran-3,4,5-Triol
1	0.638	0.362	DB00300	Tenofovir
1	0.638	0.362	DB00649	Stavudine
1	0.638	0.362	DB02066	N7-Methyl-Formycin A
1	0.638	0.362	DB02110	Protoporphyrin Ix Containing Co
1	0.638	0.362	DB03668	1-(5'-Phospho-Beta-D-Ribofuranosyl)Barbituric Acid
1	0.636	0.364	DB00536	Guanidine
1	0.636	0.364	DB02282	5'-Deoxy-5'-Methylthioadenosine
1	0.636	0.364	DB02355	Adenosine-5'-Rp-Alpha-Thio-Triphosphate
1	0.636	0.364	DB02887	2',3'-Dehydro-2',3'-Deoxy-Thymidine 5'-Triphosphate
1	0.636	0.364	DB02896	Methylthioinosine
1	0.636	0.364	DB03271	7,8-Dihydro-L-Biopterin
1	0.636	0.364	DB03448	2'-Deoxyuridine 3'-Monophosphate
1	0.636	0.364	DB03735	9-(2-Deoxy-Beta-D-Ribofuranosyl)-6-Methylpurine
1	0.636	0.364	DB03766	Propanoic Acid
1	0.636	0.364	DB03900	2-Methyl-2-Propanol
1	0.636	0.364	DB04400	7,8-dihydrobiopterin
1	0.636	0.364	DB08231	MYRISTIC ACID
1	0.634	0.366	DB00651	Dyphylline
1	0.634	0.366	DB03904	Urea
1	0.634	0.366	DB04457	2'-Deoxyguanosine-5'-Monophosphate
1	0.632	0.368	DB00879	Emtricitabine
1	0.632	0.368	DB01073	Fludarabine
1	0.632	0.368	DB02921	(South)-Methanocarba-Thymidine
1	0.632	0.368	DB03148	Phosphomethylphosphonic Acid Adenosyl Ester
1	0.632	0.368	DB04464	N-Formylmethionine
1	0.63	0.37	DB02947	2-Fluoro-2'-Deoxyadenosine
1	0.63	0.37	DB03200	7-Alpha-D-Ribofuranosyl-Purine-5'-Phosphate
1	0.63	0.37	DB03418	Diacetyldeuteroheme
1	0.63	0.37	DB03893	Thionicotinamide-Adenine-Dinucleotide
1	0.63	0.37	DB07780	FARNESYL DIPHOSPHATE
1	0.628	0.372	DB00128	L-Aspartic Acid
1	0.628	0.372	DB03846	5-Hydroxymethyluridine-2'-Deoxy-5'-Monophosphate
1	0.628	0.372	DB03994	Ethanolamine
1	0.628	0.372	DB04361	Methylhydrazine
1	0.626	0.374	DB00122	Choline
1	0.626	0.374	DB02333	Deoxyuridine-5'-Triphosphate
1	0.626	0.374	DB02380	2'-Deoxyinosine
1	0.626	0.374	DB02500	6-(Dihydroxy-Isobutyl)-Thymine
1	0.626	0.374	DB02562	Quinonoid 7,8-Tetrahydrobiopterin
1	0.626	0.374	DB03011	Adenosine-5'-(Dithio)Phosphate
1	0.626	0.374	DB03413	Deoxyuridine-5'-Diphosphate
1	0.626	0.374	DB03493	7-Methylguanosine
1	0.626	0.374	DB03562	Tetrahydrodeoxyuridine
1	0.626	0.374	DB03593	N7-Methyl-Guanosine-5'-Monophosphate
1	0.626	0.374	DB03887	Alpha-Adenosine Monophosphate
1	0.626	0.374	DB04047	[Pterin-6-Yl Methanyl]-Phosphonophosphate
1	0.626	0.374	DB04337	Methyl Isocyanide
1	0.626	0.374	DB04546	3-Deaza-Adenosine
1	0.624	0.376	DB02654	6-Hydroxy-Flavin-Adenine Dinucleotide
1	0.624	0.376	DB03172	Tubercidin
1	0.624	0.376	DB03274	2'-5'dideoxyuridine
1	0.622	0.378	DB00121	Biotin
1	0.622	0.378	DB00130	L-Glutamine
1	0.622	0.378	DB02142	Pyridoxamine-5'-Phosphate
1	0.622	0.378	DB02153	3-Sulfinoalanine
1	0.622	0.378	DB02209	Pyridoxine-5'-Phosphate
1	0.622	0.378	DB02391	2-Amino-7-[2-(2-Hydroxy-1-Hydroxymethyl-Ethylamino)-Ethyl]-1,7-Dihydro-Purin-6-One
1	0.622	0.378	DB02926	2-Oxo-Glutaric Acid
1	0.622	0.378	DB03185	1-Beta-Ribofuranosyl-1,3-Diazepinone
1	0.622	0.378	DB03195	Phosphoric Acid Mono-[3-Fluoro-5-(5-Methyl-2,4-Dioxo-3,4-Dihydro-2h-Pyrimidin-1-Yl)-Tetrahyro-Furan-2-Ylmethyl] Ester
1	0.622	0.378	DB03224	2-Formyl-Protoporphryn Ix
1	0.622	0.378	DB03806	2-Oxyglutaric Acid
1	0.622	0.378	DB03909	Adenosine-5'-[Beta, Gamma-Methylene]Triphosphate
1	0.622	0.378	DB04441	2-Fluoroadenosine
1	0.62	0.38	DB00631	Clofarabine
1	0.62	0.38	DB02309	5--Monophosphate-9-Beta-D-Ribofuranosyl Xanthine
1	0.62	0.38	DB02476	Carboxymethylated Cysteine
1	0.62	0.38	DB02934	9-(6-Deoxy-Alpha-L-Talofuranosyl)-6-Methylpurine
1	0.62	0.38	DB03068	Zebularine
1	0.62	0.38	DB03103	Thymidine-5'- Diphosphate
1	0.62	0.38	DB03318	6-Hydro-1-Methyladenosine-5'-Monophosphate
1	0.62	0.38	DB03743	1,4-Dideoxy-4-Aza-1-(S)-(9-Deazahypoxanthin-9-Yl)-D-Ribitol
1	0.62	0.38	DB03952	9-(6-Deoxy-Beta-D-Allofuranosyl)-6-Methylpurine
1	0.62	0.38	DB04158	6-(Adenosine Tetraphosphate-Methyl)-7,8-Dihydropterin
1	0.62	0.38	DB04339	Carboxymethylenecysteine
1	0.62	0.38	DB07554	2-CHLORO-9-(2-DEOXY-2-FLUORO-B -D-ARABINOFURANOSYL)-9H-PURIN-6-AMINE
1	0.618	0.382	DB01945	4-Carbamoyl-1-Beta-D-Ribofuranosyl-Imidazolium-5-Olate-5'-Phosphate
1	0.618	0.382	DB02098	Adenosine-2'-5'-Diphosphate
1	0.618	0.382	DB02579	Acrylic Acid
1	0.618	0.382	DB02674	4-(2-Oxo-Hexahydro-Thieno[3,4-D]Imidazol-4-Yl)-Butyricacid
1	0.618	0.382	DB03532	Phosphomethylphosphonic Acid Guanylate Ester
1	0.618	0.382	DB03635	Ethanesulfonic Acid
1	0.618	0.382	DB03801	Lysine Nz-Carboxylic Acid
1	0.618	0.382	DB04161	Propionamide
1	0.618	0.382	DB04218	1-Deaza-Adenosine
1	0.618	0.382	DB04650	5-[(3AS,4R,6AR)-2-OXOHEXAHYDRO-1H-THIENO[3,4-D]IMIDAZOL-4-YL]PENTANOIC ACID
1	0.616	0.384	DB00126	Vitamin C
1	0.616	0.384	DB00127	Spermine
1	0.616	0.384	DB00709	Lamivudine
1	0.616	0.384	DB00943	Zalcitabine
1	0.616	0.384	DB02793	Isochorismic Acid
1	0.616	0.384	DB03464	Formycin-5'-Monophosphate
1	0.616	0.384	DB03969	3-Acetyl Pyridine Adenine Dinucleotide
1	0.616	0.384	DB07357	4-AMINO-2-HEXYLOXY-6-HYDROXYMETHYL-TETRAHYDRO-PYRAN-3,5-DIOL
1	0.616	0.384	DB08016	4-(6-CHLORO-2,4-DIOXO-1,2,3,4-TETRAHYDROPYRIMIDIN-5-YL) BUTYL PHOSPHATE
1	0.616	0.384	DB08651	3'-THIO-THYMIDINE-5'-PHOSPHATE
1	0.614	0.386	DB01280	Nelarabine
1	0.614	0.386	DB01753	4-Oxo-Nicotinamide-Adenine Dinucleotide Phosphate
1	0.614	0.386	DB01828	Methylamine
1	0.614	0.386	DB01965	2'-Deoxyuridine 5'-Alpha,Beta-Imido-Triphosphate
1	0.614	0.386	DB02230	Immucillin-G
1	0.614	0.386	DB02382	Namn
1	0.614	0.386	DB04602	PUROMYCIN AMINONUCLEOSIDE-5'-MONOPHOSPHATE
1	0.612	0.388	DB02174	D-Glutamine
1	0.612	0.388	DB02980	Thymidine-5'-(Dithio)Phosphate
1	0.612	0.388	DB04009	Dimethyl Propionate Ester Heme
1	0.612	0.388	DB04385	3-Deazacytidine
1	0.612	0.388	DB04444	Tetrafluoroaluminate Ion
1	0.612	0.388	DB07170	5'-FLUORO-2',5'-DIDEOXYADENOSINE
1	0.61	0.39	DB00143	Glutathione
1	0.61	0.39	DB00360	Tetrahydrobiopterin
1	0.61	0.39	DB02448	N-Tridecanoic Acid
1	0.61	0.39	DB02798	Alpha-Methylene Adenosine Monophosphate
1	0.61	0.39	DB03155	1-(2-Deoxy-2-Fluoro-3-O-Phosphono-Beta-L-Ribofuranosyl)Pyrimidine-2,4(1h,3h)-Dione
1	0.61	0.39	DB03636	Glycinamid
1	0.61	0.39	DB04162	5-Nitro-6-Ribityl-Amino-2,4(1h,3h)-Pyrimidinedione
1	0.61	0.39	DB04259	7n-Methyl-8-Hydroguanosine-5'-Monophosphate
1	0.608	0.392	DB00927	Famotidine
1	0.608	0.392	DB01769	Double Oxidized Cysteine
1	0.608	0.392	DB04384	Fe-Mesopone
1	0.608	0.392	DB07646	UNDECYLAMINE-N,N-DIMETHYL-N-OXIDE
1	0.606	0.394	DB00883	Isosorbide Dinitrate
1	0.606	0.394	DB01915	S-Hydroxycysteine
1	0.606	0.394	DB02075	(1s)-1(9-Deazahypoxanthin-9yl)1,4-Dideoxy-1,4-Imino-D-Ribitol-5-Phosphate
1	0.606	0.394	DB02236	Glycinamide Ribonucleotide
1	0.606	0.394	DB02655	D-Aspartic Acid
1	0.606	0.394	DB03398	Cysteine Sulfenic Acid
1	0.606	0.394	DB03482	8-Demethyl-8-Dimethylamino-Flavin-Adenine-Dinucleotide
1	0.606	0.394	DB03641	2'-deoxyuridine 5'-alpha,beta-imido-diphosphate
1	0.606	0.394	DB04260	9-(5,5-Difluoro-5-Phosphonopentyl)Guanine
1	0.604	0.396	DB00529	Foscarnet
1	0.604	0.396	DB01159	Halothane
1	0.604	0.396	DB02527	Cyclic Adenosine Monophosphate
1	0.604	0.396	DB02714	3'-Uridinemonophosphate
1	0.604	0.396	DB02805	1-(3-O-Phosphono-Beta-L-Arabinofuranosyl)Pyrimidine-2,4(1h,3h)-Dione
1	0.604	0.396	DB03178	Guanosine-2',3'-Cyclophosphorothioate
1	0.604	0.396	DB03986	6-Methyl-Formycin A
1	0.604	0.396	DB04359	Vinylsulphonic Acid
1	0.602	0.398	DB00900	Didanosine
1	0.602	0.398	DB02222	2,6-Diamino-(S)-9-[2-(Phosphonomethoxy)Propyl]Purine
1	0.602	0.398	DB03358	7n-Methyl-8-Hydroguanosine-5'-Triphosphate
1	0.6	0.4	DB00139	Succinic acid
1	0.6	0.4	DB00556	Perflutren
1	0.6	0.4	DB01839	1,2-Propanediol
1	0.6	0.4	DB01842	3'-Phosphate-Adenosine-5'-Diphosphate
1	0.6	0.4	DB02159	R-1,2-Propanediol
1	0.6	0.4	DB02315	Cyclic Guanosine Monophosphate
1	0.6	0.4	DB02356	4-Imidazolmethylene-5-Imidazolone Chromophore
1	0.6	0.4	DB02385	Neopterin
1	0.6	0.4	DB02475	Deoxyguanidinoproclavaminic acid
1	0.6	0.4	DB02580	1-(2-Methoxy-Ethoxy)-2-{2-[2-(2-Methoxy-Ethoxy]-Ethoxy}-Ethane
1	0.6	0.4	DB02818	Iodo-Willardiine
1	0.6	0.4	DB03216	(1'r,2's)-9-(2-Hydroxy-3'-Keto-Cyclopenten-1-Yl)Adenine
1	0.6	0.4	DB03315	Guanosine-3'-Monophosphate
1	0.6	0.4	DB03349	8-Bromo-Adenosine-5'-Monophosphate
1	0.6	0.4	DB03457	2,3-Propandiol
1	0.6	0.4	DB03664	P1-(Adenosine-5'-P5-(Uridine-5')Pentaphosphate
1	0.6	0.4	DB03670	2-(Oxalyl-Amino)-4,5,6,7-Tetrahydro-Thieno[2,3-C]Pyridine-3-Carboxylic Acid
1	0.6	0.4	DB03738	Pantothenoylaminoethenethiol
1	0.6	0.4	DB04349	S-1,2-Propanediol
1	0.6	0.4	DB04536	Guanosine-3',5'-Monophosphate
1	0.6	0.4	DB04554	8-Bromoadenosine-5'-Diphosphate
1	0.598	0.402	DB02157	Beta-Hydroxy Aspartic Acid
1	0.598	0.402	DB02575	Tetraethylene Glycol
1	0.598	0.402	DB02937	Gamma-Arsono-Beta, Gamma-Methyleneadenosine-5'-Diphosphate
1	0.598	0.402	DB03215	(2s,5s)-5-Carboxymethylproline
1	0.598	0.402	DB03227	Nicotinamide Mononucleotide
1	0.598	0.402	DB03551	4'-Deaza-1'-Aza-2'-Deoxy-1'-(9-Methylene)-Immucillin-H, (3r,4r)-N-[9-Deazahypoxanthin-9-Yl)Methyl]-4-Hydroxymethyl-Pyrrolidin-3-Ol
1	0.598	0.402	DB03640	Beta-Hydroxyaspartic Acid
1	0.598	0.402	DB04068	Fudp
1	0.598	0.402	DB04085	1-[Pyrrol-1-Yl-2,5-Dione-Methoxymethyl]-Pyrrole-2,5-Dione
1	0.598	0.402	DB04160	Diphosphate
1	0.598	0.402	DB04212	2-Iminiopropanoate
1	0.598	0.402	DB04497	2'-Monophosphoadenosine-5'-Diphosphoribose
1	0.598	0.402	DB07599	[(2-AMINO-ALPHA-METHOXYIMINO-4-THIAZOLYLACETYL)AMINO]METHYLBORONIC ACID
1	0.598	0.402	DB08558	2-HYDROXYMETHYL-6-OCTYLSULFANYL-TETRAHYDRO-PYRAN-3,4,5-TRIOL
1	0.596	0.404	DB00824	Enprofylline
1	0.596	0.404	DB01961	Cytidine-3'-Monophosphate
1	0.596	0.404	DB02150	Hydantocidin-5'-Monophosphate
1	0.596	0.404	DB02212	Pyrophosphate 2-
1	0.596	0.404	DB02493	Hydantocidin-5'-Phosphate
1	0.596	0.404	DB02692	(6r,1'r,2's)-5,6,7,8 Tetrahydrobiopterin
1	0.596	0.404	DB02783	4'-Deoxy-4'-Acetylyamino-Pyridoxal-5'-Phosphate
1	0.596	0.404	DB02899	N-Carboxymethionine
1	0.596	0.404	DB02951	3-Hydroxypyruvic Acid
1	0.596	0.404	DB03168	Nicotinamide Adenine Dinucleotide Cyclohexanone
1	0.596	0.404	DB03230	Adenosine-5'-Propylphosphate
1	0.596	0.404	DB03918	6s-5,6,7,8-Tetrahydrobiopterin
1	0.596	0.404	DB03997	Phosphoric Acid Mono-[2-Amino-3-(3h-Imidazol-4-Yl)-Propyl]Ester
1	0.596	0.404	DB04083	N'-Pyridoxyl-Lysine-5'-Monophosphate
1	0.596	0.404	DB04438	BVDU-MP
1	0.596	0.404	DB07824	4-ethyl-5-methyl-2-(1H-tetrazol-5-yl)-1,2-dihydro-3H-pyrazol-3-one
1	0.594	0.406	DB02637	Oxaloacetate Ion
1	0.594	0.406	DB02987	Cysteine-S-Acetamide
1	0.594	0.406	DB03102	2-(Oxalyl-Amino)-4,7-Dihydro-5h-Thieno[2,3-C]Pyran-3-Carboxylic Acid
1	0.594	0.406	DB03499	Malate Ion
1	0.594	0.406	DB03629	Pyridoxal-5'-Phosphate-N-Oxide
1	0.594	0.406	DB04075	N-Acetyl-L-Glutamate
1	0.594	0.406	DB07497	5-(HEXAHYDRO-2-OXO-1H-THIENO[3,4-D]IMIDAZOL-6-YL)PENTANAL
1	0.592	0.408	DB00614	Furazolidone
1	0.592	0.408	DB00909	Zonisamide
1	0.592	0.408	DB01790	Sp-Adenosine-3',5'-Cyclic-Monophosphorothioate
1	0.592	0.408	DB02203	Acetone Cyanohydrin
1	0.592	0.408	DB02392	2'3'-Dideoxyinosine
1	0.592	0.408	DB02954	(Carboxyhydroxyamino)Ethanoic Acid
1	0.592	0.408	DB03510	6-O-Phosphoryl Inosine Monophosphate
1	0.592	0.408	DB03962	Nicotinamide 8-Bromo-Adenine Dinucleotide Phosphate
1	0.592	0.408	DB04421	Nicotinamide Adenine Dinucleotide 3-Pentanone Adduct
1	0.59	0.41	DB00698	Nitrofurantoin
1	0.59	0.41	DB00898	Ethanol
1	0.59	0.41	DB01598	Imipenem
1	0.59	0.41	DB01639	N-Methyl-Pyridoxal-5'-Phosphate
1	0.59	0.41	DB01844	Dimethylformamide
1	0.59	0.41	DB01956	2-Aminoethanesulfonic Acid
1	0.59	0.41	DB02416	2-Ribofuranosyl-3-Iodo-2,3-Dihydro-1h-Pyrazolo[3,4-D]Pyrimidin-4-Ylamine
1	0.59	0.41	DB02528	Tetrazolyl Histidine
1	0.59	0.41	DB02767	3-Hydroxy-Myristic Acid
1	0.59	0.41	DB02916	[(2r,3s,4r,5r)-5-(6-Amino-9h-Purin-9-Yl)-3,4-Dihydroxytetrahydro-2-Furanyl]Methyl Sulfamate
1	0.59	0.41	DB02933	5'-Deoxy-5'-(Methylthio)-Tubercidin
1	0.59	0.41	DB02952	Alpha-Aminoisobutyric Acid
1	0.59	0.41	DB03089	L-Iso-Aspartate
1	0.59	0.41	DB03353	2-Iminobiotin
1	0.59	0.41	DB03680	Tartronate
1	0.59	0.41	DB04128	5-Nitroso-6-Ribityl-Amino-2,4(1h,3h)-Pyrimidinedione
1	0.59	0.41	DB04757	GUANOSINE-2',3'-O-METHYLIDENEPHOSPHONATE
1	0.59	0.41	DB06864	2-(3-CARBOXYPROPIONYL)-6-HYDROXY-CYCLOHEXA-2,4-DIENE CARBOXYLIC ACID
1	0.588	0.412	DB01610	Valganciclovir
1	0.588	0.412	DB02103	2-Chlorodideoxyadenosine
1	0.588	0.412	DB02920	Zn(Ii)-(20-Oxo-Protoporphyrin Ix)
1	0.588	0.412	DB02922	Hexafluoroacetone Hydrate
1	0.588	0.412	DB03240	(S)-2-Amino-3-(1,3,5,7-Pentahydro-2,4-Dioxo-Cyclopenta[E]Pyrimidin-1-Yl) Proionic Acid
1	0.588	0.412	DB03489	2-Keto-3-Deoxygluconate
1	0.588	0.412	DB03498	Mercaptomethyl Phosphonate
1	0.588	0.412	DB03539	2-(Acetylamino)-2-Deoxy-6-O-Methyl-Alpha-D-Allopyranose
1	0.588	0.412	DB03770	N-Hydroxyguanidine
1	0.588	0.412	DB03912	4'-Phosphopantetheine
1	0.588	0.412	DB04542	3'-Azido-3'-Deoxythymidine-5'-Diphosphate
1	0.588	0.412	DB07481	tert-butyl [(2-amino-4-oxo-4,7-dihydro-3H-pyrrolo[2,3-d]pyrimidin-5-yl)methyl]carbamate
1	0.588	0.412	DB08185	2-METHYLTHIO-N6-ISOPENTENYL-ADENOSINE-5'-MONOPHOSPHATE
1	0.588	0.412	DB08255	(3AR,5R,6S,7R,7AR)-5-(HYDROXYMETHYL)-2-PROPYL-5,6,7,7A-TETRAHYDRO-3AH-PYRANO[3,2-D][1,3]THIAZOLE-6,7-DIOL
1	0.586	0.414	DB00369	Cidofovir
1	0.586	0.414	DB01937	Guanosine-2'-Monophosphate
1	0.586	0.414	DB01974	2-Amino-3-[5-(Amino-Carboxy-Methyl)-2,3-Dihydro-Isoxazol-3-Ylsulfanyl]-Propionic Acid
1	0.586	0.414	DB02039	S-Acetyl-Cysteine
1	0.586	0.414	DB02072	2-(Oxalyl-Amino)-4,7-Dihydro-5h-Thieno[2,3-C]Thiopyran-3-Carboxylic Acid
1	0.586	0.414	DB02413	Hydroxyethylcysteine
1	0.586	0.414	DB03091	4-Amido-4-Carbamoyl-Butyric Acid
1	0.586	0.414	DB03142	Alpha-L-Arabinose
1	0.586	0.414	DB03246	Beta-L-Arabinose
1	0.586	0.414	DB03382	S-Oxy Cysteine
1	0.586	0.414	DB03389	Xylopyranose
1	0.586	0.414	DB03397	Uridine-Diphosphate-N-Acetylglucosamine
1	0.586	0.414	DB03423	S-Adenosyl-L-Homoselenocysteine
1	0.586	0.414	DB03794	Trifluoroalanine
1	0.586	0.414	DB03796	Palmitic Acid
1	0.586	0.414	DB03797	3-Aminomethyl-Pyridinium-Adenine-Dinucleotide
1	0.586	0.414	DB03886	Biopterin
1	0.586	0.414	DB03911	L-Xylose (Cyclic Form)
1	0.586	0.414	DB04249	Zinc Substituted Heme C
1	0.586	0.414	DB04286	Ribose(Pyranose Form)
1	0.586	0.414	DB08321	(1S,2S,3R,6R)-4-(hydroxymethyl)-6-(octylamino)cyclohex-4-ene-1,2,3-triol
1	0.584	0.416	DB00133	L-Serine
1	0.584	0.416	DB00151	L-Cysteine
1	0.584	0.416	DB00155	L-Citrulline
1	0.584	0.416	DB01034	Cerulenin
1	0.584	0.416	DB01869	Rhamnose
1	0.584	0.416	DB02196	Uridine-Diphosphate-N-Acetylgalactosamine
1	0.584	0.416	DB02682	2-Deamino-6-Deoxy-6thiophosphite-5'-Phosphate Guanosine
1	0.584	0.416	DB02688	2,3-Didehydroalanine
1	0.584	0.416	DB03146	2-Deazo-6-Thiophosphate Guanosine-5'-Monophosphate
1	0.584	0.416	DB03175	1-Proponol
1	0.584	0.416	DB03485	Alpha-D-Fucose
1	0.584	0.416	DB03578	Pyruvamide
1	0.584	0.416	DB03725	Phosphomethylphosphonic Acid-Guanylate Ester
1	0.584	0.416	DB03773	6-Deoxy-Alpha-D-Glucose
1	0.584	0.416	DB03775	D-Dethiobiotin
1	0.584	0.416	DB03965	Fucose
1	0.584	0.416	DB04000	Bromo-Willardiine
1	0.584	0.416	DB04062	Beta-D-Fucose
1	0.584	0.416	DB04319	6-Deoxyglucose
1	0.584	0.416	DB04473	Alpha-L-Fucose
1	0.582	0.418	DB00125	L-Arginine
1	0.582	0.418	DB01055	Mimosine
1	0.582	0.418	DB01735	3-Chloroalaninate
1	0.582	0.418	DB02446	Glutamine Hydroxamate
1	0.582	0.418	DB02823	Phosphonoacetic Acid
1	0.582	0.418	DB02845	Methylphosphinic Acid
1	0.582	0.418	DB02897	Acetylphosphate
1	0.582	0.418	DB03112	6-(2-Oxo-Hexahydro-Thieno[3,4-D]Imidazol-4-Yl)-Hexanoic Acid
1	0.582	0.418	DB03366	Imidazole
1	0.582	0.418	DB03589	Alpha-Ketomalonic Acid
1	0.582	0.418	DB03704	12-Hydroxydodecanoic Acid
1	0.582	0.418	DB03719	N-Ethyl-5'-Carboxamido Adenosine
1	0.582	0.418	DB03754	Tris(Hydroxymethyl)Aminomethane
1	0.582	0.418	DB03934	Protoporphyrin Ix Containing Zn
1	0.582	0.418	DB04257	Palmitoleic Acid
1	0.582	0.418	DB04313	3-Methyl-Aspartic Acid
1	0.582	0.418	DB04390	Methyl Phosphinic Acid
1	0.582	0.418	DB04530	S,S-(2-Hydroxyethyl)Thiocysteine
1	0.582	0.418	DB04538	2s,3s-3-Methylaspartic Acid
1	0.582	0.418	DB07517	3-CARBOXY-4-METHYL-5-PROPYL-2-FURANPROPIONIC
1	0.582	0.418	DB08776	N-(4-OXO-5,6,7,8-TETRAHYDRO-4H-[1,3]THIAZOLO[5,4-C]AZEPIN-2-YL)ACETAMIDE
1	0.58	0.42	DB01661	Phosphoribosyl Atp
1	0.58	0.42	DB02042	2-(2-{2-[2-(2-Methoxy-Ethoxy)-Ethoxy]-Ethoxy}-Ethoxy)-Ethanol
1	0.58	0.42	DB02119	6-Hydroxymethyl-7,8-Dihydropterin
1	0.58	0.42	DB02650	Tri-Chloro-Acetaldehyde
1	0.58	0.42	DB03283	beta-L-fucose
1	0.58	0.42	DB03843	Formaldehyde
1	0.58	0.42	DB04568	5-Aminoimidazole Ribonucleoside
1	0.58	0.42	DB04604	5-iodotubercidin
1	0.58	0.42	DB08427	PREPHENIC ACID
1	0.578	0.422	DB00174	L-Asparagine
1	0.578	0.422	DB00766	Clavulanate
1	0.578	0.422	DB01910	Adenosyl-Ornithine
1	0.578	0.422	DB01921	Xylose-Derived Lactam Oxime
1	0.578	0.422	DB02158	(1s)-1-(9-Deazaadenin-9-Yl)-1,4,5-Trideoxy-1,4-Imino-5-Methylthio-D-Ribitol
1	0.578	0.422	DB02631	5-Chloro-6-[(2-Iminopyrrolidin-1-Yl)Methyl]Pyrimidine-2,4(1h,3h)-Dione
1	0.578	0.422	DB02670	4-Deoxy-Alpha-D-Glucose
1	0.578	0.422	DB02950	Hymenialdisine
1	0.578	0.422	DB03077	3-Amino-4-{3-[2-(2-Propoxy-Ethoxy)-Ethoxy]-Propylamino}-Cyclobut-3-Ene-1,2-Dione
1	0.578	0.422	DB03881	MT-Immucillin-H
1	0.578	0.422	DB04334	6-hydroxydopa quinone
1	0.576	0.424	DB00594	Amiloride
1	0.576	0.424	DB01837	O-Acetylserine
1	0.576	0.424	DB02549	3'-O-Acetylthymidine-5'-Diphosphate
1	0.576	0.424	DB02949	2-Acetyl-Protoporphyrin Ix
1	0.576	0.424	DB02957	Orotidine-5'-Monophosphate
1	0.576	0.424	DB03048	6-Carboxymethyluracil
1	0.576	0.424	DB03066	D-Lactic Acid
1	0.576	0.424	DB03291	4-Deoxy-4-Amino-Beta-D-Glucose
1	0.576	0.424	DB03300	Pterin Cytosine Dinucleotide
1	0.576	0.424	DB03375	Hydroxyalanine
1	0.576	0.424	DB03755	Adenosine-5'-[Beta, Gamma-Methylene]Tetraphosphate
1	0.576	0.424	DB03929	D-Serine
1	0.576	0.424	DB04199	1-Monohexanoyl-2-Hydroxy-Sn-Glycero-3-Phosphate
1	0.576	0.424	DB04294	5-Phosphoribosyl-1-(Beta-Methylene) Pyrophosphate
1	0.576	0.424	DB04398	Lactic Acid
1	0.576	0.424	DB06843	2',5'-DIDEOXY-ADENOSINE 3'-MONOPHOSPHATE
1	0.576	0.424	DB07052	5'-S-ethyl-5'-thioadenosine
1	0.576	0.424	DB07980	(2E)-1-[(6-chloropyridin-3-yl)methyl]-N-nitroimidazolidin-2-imine
1	0.574	0.426	DB02389	Phosphoglycolic Acid
1	0.574	0.426	DB02726	2-Phosphoglycolic Acid
1	0.574	0.426	DB02824	N-Pyridoxyl-Glycine-5-Monophosphate
1	0.574	0.426	DB02948	Fosmidomycin
1	0.574	0.426	DB03144	N-Omega-Hydroxy-L-Arginine
1	0.574	0.426	DB03631	3-(4-Hydroxy-3-Imino-6-Oxo-Cyclohexa-1,4-Dienyl)-Alanine
1	0.574	0.426	DB03804	5-Bromothienyldeoxyuridine
1	0.574	0.426	DB04077	Glycerol
1	0.574	0.426	DB04167	N-Acetyl-L-Glutamine
1	0.574	0.426	DB04299	Maleic Acid
1	0.574	0.426	DB04433	N''-{3-[(3s,8ar)-1,4-Dioxooctahydropyrrolo[1,2-a]Pyrazin-3-Yl]Propyl}Guanidine
1	0.574	0.426	DB04594	3-hydroxyglutaric acid
1	0.574	0.426	DB04695	FARNESYL THIOPYROPHOSPHATE
1	0.572	0.428	DB02262	Orotic Acid
1	0.572	0.428	DB02275	[2-Aminomethyl-5-Oxo-4-(4-Oxo-Cyclohexa-2,5-Dienylmethyl)-4,5-Dihydro-Imidazol-1-Yl] -Acetaldehyde
1	0.572	0.428	DB02381	Nor-N-Omega-Hydroxy-L-Arginine
1	0.572	0.428	DB02414	(3s,8ar)-3-(1h-Imidazol-5-Ylmethyl)Hexahydropyrrolo[1,2-a]Pyrazine-1,4-Dione
1	0.572	0.428	DB02966	Fluoro-Willardiine
1	0.572	0.428	DB03138	Perchlorate Ion
1	0.572	0.428	DB03174	Phosphonoacetaldehyde
1	0.572	0.428	DB03394	Heptaethylene Glycol, Peg330
1	0.572	0.428	DB03765	Cytidine-2'-Monophosphate
1	0.572	0.428	DB03858	S-Acetonylcysteine
1	0.572	0.428	DB03951	16g
1	0.572	0.428	DB04129	Willardiine
1	0.572	0.428	DB04183	Methylmalonic Acid
1	0.572	0.428	DB04296	5-Oxo-L-Norleucine
1	0.572	0.428	DB04562	Tricarballylic Acid
1	0.572	0.428	DB07298	3-(CARBOXYMETHOXY)THIENO[2,3-B]PYRIDINE-2-CARBOXYLIC ACID
1	0.572	0.428	DB07681	DODECANESULFONATE ION
1	0.57	0.43	DB00160	L-Alanine
1	0.57	0.43	DB00911	Tinidazole
1	0.57	0.43	DB02498	Carba-Nicotinamide-Adenine-Dinucleotide
1	0.57	0.43	DB03835	N-(8,9,10-Trihydroxy-7-Hydroxymethyl-2,4-Dioxo-6-Oxa-1,3-Diaza-Spiro[4.5]Dec-3-Yl-Acetamide
1	0.57	0.43	DB03936	1-Deoxy-Ribofuranose-5'-Phosphate
1	0.57	0.43	DB04328	Shikimate-3-Phosphate
1	0.57	0.43	DB08259	7-{[(CYCLOHEXYLAMINO)CARBONYL]AMINO}HEPTANOIC ACID
1	0.568	0.432	DB01236	Sevoflurane
1	0.568	0.432	DB01632	Alpha-Phosphoribosylpyrophosphoric Acid
1	0.568	0.432	DB01664	(S)-Des-Me-Ampa
1	0.568	0.432	DB02201	Malonate Ion
1	0.568	0.432	DB02343	3,6,9,12,15-Pentaoxaheptadecane
1	0.568	0.432	DB02423	Thiopyrophosphate
1	0.568	0.432	DB02484	Cytidine 5'-Diphosphoglycerol
1	0.568	0.432	DB02772	Sucrose
1	0.568	0.432	DB03145	4-Methyl-5-Hydroxyethylthiazole Phosphate
1	0.568	0.432	DB03343	Malate Like Intermediate
1	0.568	0.432	DB03364	N-Carbamyl-D-Methionine
1	0.568	0.432	DB03553	Glutaric Acid
1	0.568	0.432	DB03661	Cysteinesulfonic Acid
1	0.568	0.432	DB04022	Guanosine-5',3'-Tetraphosphate
1	0.566	0.434	DB00659	Acamprosate
1	0.566	0.434	DB00791	Uracil mustard
1	0.566	0.434	DB01189	Desflurane
1	0.566	0.434	DB01692	Dithioerythritol
1	0.566	0.434	DB01695	N-Hydroxy-4-Phosphono-Butanamide
1	0.566	0.434	DB01804	2-Ammoniobut-3-Enoate, 2-Amino-3-Butenoate
1	0.566	0.434	DB01885	D-Galctopyranosyl-1-On
1	0.566	0.434	DB02002	2-Aminoprop-2-Enamide
1	0.566	0.434	DB02129	Dihydroorotic Acid
1	0.566	0.434	DB02175	Malonic acid
1	0.566	0.434	DB02184	(2s,3s)-1,4-Dimercaptobutane-2,3-Diol
1	0.566	0.434	DB02289	2-Aminopropanedioic Acid
1	0.566	0.434	DB02418	(R,R)-2,3-Butanediol
1	0.566	0.434	DB02999	Quisqualate
1	0.566	0.434	DB03278	D-Treitol
1	0.566	0.434	DB03399	Ethyl Isocyanide
1	0.566	0.434	DB03469	Heme D
1	0.566	0.434	DB03927	Glycyl-L-Alpha-Amino-Epsilon-Pimelyl-D-Alanine
1	0.566	0.434	DB03937	Erythose-4-Phosphate
1	0.566	0.434	DB03953	L-Thiocitrulline
1	0.566	0.434	DB04382	2-Deoxy-Beta-D-Galactose
1	0.566	0.434	DB04447	1,4-Dithiothreitol
1	0.566	0.434	DB04481	Meso-Erythritol
1	0.566	0.434	DB04564	Gluconolactone
1	0.566	0.434	DB07173	7-(5-DEOXY-BETA-D-RIBOFURANOSYL)-5-IODO-7H-PYRROLO[2,3-D]PYRIMIDIN-4-AMINE
1	0.566	0.434	DB07849	S-NONYL-CYSTEINE
1	0.564	0.436	DB00336	Nitrofurazone
1	0.564	0.436	DB01563	Chloral hydrate
1	0.564	0.436	DB02011	N-(Phosphonoacetyl)-L-Ornithine
1	0.564	0.436	DB02228	2-Fluoro-2-Deoxy-Beta-D-Galactopyranose
1	0.564	0.436	DB02267	Argininosuccinate
1	0.564	0.436	DB02321	5-(3-Amino-4,4-Dihyroxy-Butylsulfanylmethyl)-Tetrahydro-Furan-2,3,4-Triol
1	0.564	0.436	DB03041	Udp-Glucuronic Acid
1	0.564	0.436	DB03304	7-Deaza-7-Aminomethyl-Guanine
1	0.564	0.436	DB03354	2-(Beta-D-Glucopyranosyl)-5-Methyl-1,3,4-Oxadiazole
1	0.564	0.436	DB03772	2-Hexyloxy-6-Hydroxymethyl-Tetrahydro-Pyran-3,5-Diol
1	0.564	0.436	DB04084	2-Deoxy-2-Fluoro-Alpha-D-Mannose
1	0.564	0.436	DB04189	N2-(Carboxyethyl)-L-Arginine
1	0.564	0.436	DB04282	2-Deoxy-2fluoro-Glucose
1	0.564	0.436	DB04332	2-{2-[2-2-(Methoxy-Ethoxy)-Ethoxy]-Ethoxy}-Ethanol
1	0.564	0.436	DB04483	2-Deoxy-2-Fluoro-Beta-D-Mannose
1	0.564	0.436	DB04527	Beta-Hydroxyasparagine
1	0.564	0.436	DB04754	GUANOSINE-2',3'-O-ETHYLIDENEPHOSPHONATE
1	0.564	0.436	DB08283	(2R,3R,4R,5S)-2-(HYDROXYMETHYL)-1-NONYLPIPERIDINE-3,4,5-TRIOL
1	0.562	0.438	DB00162	Vitamin A
1	0.562	0.438	DB00855	Aminolevulinic acid
1	0.562	0.438	DB01677	Fumarate
1	0.562	0.438	DB01786	D-Alanine
1	0.562	0.438	DB01993	N-(5'-Phosphopyridoxyl)-D-Alanine
1	0.562	0.438	DB02038	D-Pyridoxyl-N,O-Cycloserylamide-5-Monophosphate
1	0.562	0.438	DB02108	2-Aminoethanimidic Acid
1	0.562	0.438	DB02499	Dinor-N(Omega)-Hydroxy-L-Arginine
1	0.562	0.438	DB02564	Spermine (Fully Protonated Form)
1	0.562	0.438	DB02695	O1-Pentyl-Mannose
1	0.562	0.438	DB02778	2,5-Anhydroglucitol-1,6-Biphosphate
1	0.562	0.438	DB02816	7-(1-Methyl-1,2,3-Triazol-4-Yl)-6-Formyl-2,7-Dihydro-[1,4]Thiazepine-3-Carboxylic Acid, Brl42715, C6-(N1-Methyl-1,2,3-Triazolylmethylene)Penem
1	0.562	0.438	DB02825	Methylphosphonic Acid Ester Group
1	0.562	0.438	DB03186	U-Pi-a-Pi
1	0.562	0.438	DB03445	Tazobactam Trans-Enamine Intermediate
1	0.562	0.438	DB03579	Pyridoxyl-N,O-Cycloserylamide-5-Monophosphate
1	0.562	0.438	DB03787	L-Pyridoxyl-N,O-Cycloserylamide-5-Monophosphate
1	0.562	0.438	DB03822	Ethyl Dihydrogen Phosphate
1	0.562	0.438	DB03834	Tazobactam Intermediate
1	0.562	0.438	DB03943	D-Asparagine
1	0.562	0.438	DB04362	Adenosine Diphosphate 5-(Beta-Ethyl)-4-Methyl-Thiazole-2-Carboxylic Acid
1	0.562	0.438	DB04467	Pyridoxyl-Alanine-5-Phosphate
1	0.562	0.438	DB04548	4-Deoxy-D-Glucuronic Acid
1	0.562	0.438	DB04684	BIS(HEXAMETHYLENE)TRIAMINE
1	0.562	0.438	DB04734	Citraconic acid
1	0.562	0.438	DB04753	9-DEAZAINOSINE-2',3'-O-ETHYLIDENEPHOSPHONATE
1	0.562	0.438	DB07551	2-CHLORO-4-ETHYLAMINO-6-(S(-)-2'-CYANO-4-BUTYLAMINO)-1,3,5-TRIAZINE
1	0.562	0.438	DB07552	2-CHLORO-4-ETHYLAMINO-6-(R(+)-2'-CYANO-4-BUTYLAMINO)-1,3,5-TRIAZINE
1	0.562	0.438	DB08324	N-3-OXO-DODECANOYL-L-HOMOSERINE LACTONE
1	0.56	0.44	DB00115	Cyanocobalamin
1	0.56	0.44	DB00853	Temozolomide
1	0.56	0.44	DB00863	Ranitidine
1	0.56	0.44	DB01898	2s,3r-2-Amino-3-Methylpentanedioic Acid
1	0.56	0.44	DB02094	N-2-Thiophen-2-Yl-Acetamide Boronic Acid
1	0.56	0.44	DB02227	4,5-Dihydroxy-Tetrahydro-Pyran-2-Carboxylic Acid
1	0.56	0.44	DB02807	D-2-Keto-3-Deoxygalactonate
1	0.56	0.44	DB02927	Mixed Carbamic Phosphoric Acid Anhydride of 7,8-Diaminononanic Acid
1	0.56	0.44	DB03134	2-Aminopimelic Acid
1	0.56	0.44	DB03163	(2-[2-Ketopropylthio]Ethanesulfonate
1	0.56	0.44	DB03188	4-Thio-Beta-D-Glucopyranose
1	0.56	0.44	DB03303	D-2-Keto-3-Deoxygluconate
1	0.56	0.44	DB03387	N-Hydroxy-N-Isopropyloxamic Acid
1	0.56	0.44	DB03584	4-Deoxy-4-Thio-Beta-D-Glucopyranose
1	0.56	0.44	DB03599	4-Thio-D-Glucose
1	0.56	0.44	DB03810	(3r)-3-Methyl-L-Glutamic Acid
1	0.56	0.44	DB03816	Difluoromethionine
1	0.56	0.44	DB04021	MF268
1	0.56	0.44	DB04173	Fructose
1	0.56	0.44	DB04450	Heptyl 1-Thiohexopyranoside
1	0.56	0.44	DB06904	(5S,6S)-6-[(R)ACETOXYETH-2-YL]-PENEM-3-CARBOXYLATEPROPANE
1	0.56	0.44	DB08081	3-OXO-OCTANOIC ACID (2-OXO-TETRAHYDRO-FURAN-3-YL)-AMIDE
1	0.56	0.44	DB08605	6-METHYL-2(PROPANE-1-SULFONYL)-2H-THIENO[3,2-D][1,2,3]DIAZABORININ-1-OL
1	0.56	0.44	DB08690	UBIQUINONE-2
1	0.558	0.442	DB01143	Amifostine
1	0.558	0.442	DB01819	Phosphoenolpyruvate
1	0.558	0.442	DB02186	N-Acetyl-D-Galactosamine 6-Sulfate
1	0.558	0.442	DB02404	1-Deoxy-1-Thio-Heptaethylene Glycol
1	0.558	0.442	DB02761	S-Mercaptocysteine
1	0.558	0.442	DB02898	5-{[(2-Amino-9h-Purin-6-Yl)Oxy]Methyl}-2-Pyrrolidinone
1	0.558	0.442	DB03309	N-Cyclohexyltaurine
1	0.558	0.442	DB03550	Isopenicillin N
1	0.558	0.442	DB03720	Z-Dehydrobutyrine
1	0.558	0.442	DB04039	3-Oxo-Pentadecanoic Acid
1	0.558	0.442	DB04233	(Hydroxyethyloxy)Tri(Ethyloxy)Octane
1	0.558	0.442	DB04323	2-Amino-3-(Cystein-S-Yl)-Isoxazolidin-5-Yl-Acetic Acid
1	0.558	0.442	DB07782	4-AMINO-2-TRIFLUOROMETHYL-5-HYDROXYMETHYLPYRIMIDINE PYROPHOSPHATE
1	0.558	0.442	DB07823	(2S)-2-[(3aR,4R,7S,7aS)-1,3-dioxooctahydro-2H-4,7-methanoisoindol-2-yl]propanoic acid
1	0.556	0.444	DB00501	Cimetidine
1	0.556	0.444	DB00806	Pentoxifylline
1	0.556	0.444	DB01101	Capecitabine
1	0.556	0.444	DB02278	7,8-Dihydro-7,7-Dimethyl-6-Hydroxypterin
1	0.556	0.444	DB02348	Fluoro-Phosphite Ion
1	0.556	0.444	DB02437	(5r)-5-Amino-6-Hydroxyhexylcarbamic Acid
1	0.556	0.444	DB02672	Chloroacetone
1	0.556	0.444	DB02847	(2s,3r)-1-Amino-2-Methylbutane-2,3-Diol
1	0.556	0.444	DB03070	Selenazole-4-Carboxyamide-Adenine Dinucleotide
1	0.556	0.444	DB03381	Hexadecanal
1	0.556	0.444	DB03432	Beta-Amino Isobutyrate
1	0.556	0.444	DB03709	Bicine
1	0.556	0.444	DB04027	D-Arginine
1	0.556	0.444	DB04035	Pinacol[[2-Amino-Alpha-(1-Carboxy-1-Methylethoxyimino)-4-Thiazoleacetyl]Amino]Methaneboronate
1	0.556	0.444	DB04193	L-Homoserine
1	0.556	0.444	DB04230	Nitromethyldethia Coenzyme A
1	0.556	0.444	DB07850	(1R,2S)-2-(5-thioxo-4,5-dihydro-1H-1,2,4-triazol-3-yl)cyclohexanecarboxylic acid
1	0.554	0.446	DB00141	N-Acetyl-D-glucosamine
1	0.554	0.446	DB00819	Acetazolamide
1	0.554	0.446	DB01414	Cefacetrile
1	0.554	0.446	DB01774	Adenosine-5'-Monophosphate Glucopyranosyl-Monophosphate Ester
1	0.554	0.446	DB01775	Dihydroxyacetone
1	0.554	0.446	DB02808	Trifluorofurnesyl Diphosphate
1	0.554	0.446	DB02813	2-Acetamido-2-Deoxy-D-Glucono-1,5-Lactone
1	0.554	0.446	DB03017	Lauric Acid
1	0.554	0.446	DB03284	2,6-Anhydro-3-Deoxy-D-Erythro-Hex-2-Enonic Acid
1	0.554	0.446	DB03915	2-Amino-3-Ketobutyric Acid
1	0.554	0.446	DB03981	1,4-Dideoxy-5-Dehydro-O2-Sulfo-Glucuronic Acid
1	0.554	0.446	DB04024	N'-L-Seryl-3'-Amino-(3'-Deoxy)-Adenosine
1	0.554	0.446	DB04326	1,3-Dihydroxyacetonephosphate
1	0.554	0.446	DB04699	4-Butyrolactone
1	0.554	0.446	DB06881	(1Z)-2-HYDROXY-3-OXOHEX-1-EN-1-YL DIHYDROGEN PHOSPHATE
1	0.554	0.446	DB08160	(2S)-2-AMINO-4-(METHYLSULFANYL)-1-(1,3-THIAZOL-2-YL)BUTANE-1,1-DIOL
1	0.552	0.448	DB00428	Streptozocin
1	0.552	0.448	DB01895	Aspartyl-Adenosine-5'-Monophosphate
1	0.552	0.448	DB02007	Alpha-D-Glucose-6-Phosphate
1	0.552	0.448	DB02162	5'-O-(N-Ethyl-Sulfamoyl)Adenosine
1	0.552	0.448	DB02235	Methionine Sulfoxide
1	0.552	0.448	DB02312	Beta-Galactose-6-Phosphate
1	0.552	0.448	DB02318	2-Deoxy-2-Fluoro-Alpha-D-Mannosyl Fluoride
1	0.552	0.448	DB02340	N-Acetyl-Serine
1	0.552	0.448	DB02349	Nicotinamide-Adenine-Dinucleotide-5-Hydroxy-4-Oxonorvaline
1	0.552	0.448	DB02467	S-Oxymethionine
1	0.552	0.448	DB02474	Bmsc-0013
1	0.552	0.448	DB02554	Sulfoquinovose-Uridine-C1,5'-Diphosphate
1	0.552	0.448	DB02604	2-Deoxy-Glucose-6-Phosphate
1	0.552	0.448	DB02657	Glucosamine 6-Phosphate
1	0.552	0.448	DB02821	Canaline
1	0.552	0.448	DB02828	5-Fluorolevulinic Acid
1	0.552	0.448	DB02900	Alpha-D-Mannose-6-Phosphate
1	0.552	0.448	DB03201	D-Cysteine
1	0.552	0.448	DB03663	1-[(2-Amino-6,9-Dihydro-1h-Purin-6-Yl)Oxy]-3-Methyl-2-Butanol
1	0.552	0.448	DB03717	3-Hydroxy-4-(3,4,5-Trihydroxy-Tetrahydro-Pyran-2-Yloxy)-Piperidin-2-One
1	0.552	0.448	DB03746	3-Amino-4,5-Dihydroxy-Cyclohex-1-Enecarboxylate
1	0.552	0.448	DB04122	Beta-D-Glucose-6-Phosphate
1	0.552	0.448	DB04252	N-Carbamoyl-L-Aspartate
1	0.552	0.448	DB04443	Free Cysteine
1	0.552	0.448	DB04687	DIMETHYL THIOPHOSPHATE
1	0.55	0.45	DB01020	Isosorbide Mononitrate
1	0.55	0.45	DB01975	AMPCPR
1	0.55	0.45	DB02214	6,7-Dioxo-5h-8-Ribitylaminolumazine
1	0.55	0.45	DB02738	Adenosine-5'-Pentaphosphate
1	0.55	0.45	DB02779	Dodecane-Trimethylamine
1	0.55	0.45	DB02788	S,3-Hydroxybutan-2-One
1	0.55	0.45	DB02836	Guanosine 5'-Diphosphate 2':3'-Cyclic Monophosphate
1	0.55	0.45	DB03129	[3-(1,3,2-Dioxaborolan-2-Yloxy)Propyl]Guanidine
1	0.55	0.45	DB03161	Thymidine-5'-Diphospho-Beta-D-Xylose
1	0.55	0.45	DB03209	Oxonic Acid
1	0.55	0.45	DB03218	N-Acetyl-N'-Beta-D-Glucopyranosyl Urea
1	0.55	0.45	DB03320	3-Amino-Alanine
1	0.55	0.45	DB03906	2-Phenylheme
1	0.55	0.45	DB03974	L-Homoarginine
1	0.55	0.45	DB04023	Guanosine 5'-(Trihydrogen Diphosphate), P'-D-Mannopyranosyl Ester
1	0.55	0.45	DB04127	Beta-D-Arabinofuranose-5'-Phosphate
1	0.55	0.45	DB04352	[(2r,3s,4s,5r)-3,4,5-Trihydroxytetrahydrofuran-2-Yl]Methyl Dihydrogen Phosphate
1	0.55	0.45	DB04364	R,3-Hydroxybutan-2-One
1	0.55	0.45	DB08712	11-[(MERCAPTOCARBONYL)OXY]UNDECANOIC ACID
1	0.548	0.452	DB01005	Hydroxyurea
1	0.548	0.452	DB01296	Glucosamine
1	0.548	0.452	DB01649	7-Methyl-Gpppa
1	0.548	0.452	DB02215	Furoyl-Leucine
1	0.548	0.452	DB02469	4,6-Dideoxy-4-Amino-Beta-D-Glucopyranoside
1	0.548	0.452	DB02536	(2r)-2,3-Dihydroxypropanal
1	0.548	0.452	DB02571	2-Amino-6-Oxo-Hexanoic Acid
1	0.548	0.452	DB02609	4-Hydroxy-L-Threonine-5-Monophosphate
1	0.548	0.452	DB02734	4-Deoxy-D-Mannuronic Acid
1	0.548	0.452	DB02757	Pyrazole
1	0.548	0.452	DB03064	3-Decyl-2,5-Dioxo-4-Hydroxy-3-Pyrroline
1	0.548	0.452	DB03191	3-Oxiran-2ylalanine
1	0.548	0.452	DB03197	6-Hydroxymethylpterin
1	0.548	0.452	DB03212	4-Deoxyglucarate
1	0.548	0.452	DB03305	N5-Iminoethyl-L-Ornithine
1	0.548	0.452	DB03434	3[N-Morpholino]Propane Sulfonic Acid
1	0.548	0.452	DB03439	4,6-Dideoxy-4-Amino-Alpha-D-Glucose
1	0.548	0.452	DB03645	Phosphonoacetohydroxamic Acid
1	0.548	0.452	DB03649	[{(5-Chloro-2-Pyridinyl)Amino} Methylene]-1,1-Bisphosphonate
1	0.548	0.452	DB03751	2'deoxy-Thymidine-5'-Diphospho-Alpha-D-Glucose
1	0.548	0.452	DB03862	Tetrahydrooxazine
1	0.548	0.452	DB03920	N-Methyl-Alpha-Beta-Dehydroalanine
1	0.548	0.452	DB03947	D-Xylulose
1	0.548	0.452	DB04377	3-Hydroxy-3-Methyl-Glutaric Acid
1	0.548	0.452	DB04389	Ado-P-Ch2-P-Ps-Ado
1	0.548	0.452	DB04493	Fructose-6-Phosphate
1	0.548	0.452	DB04511	N-Succinyl Methionine
1	0.548	0.452	DB07060	3-(INDOL-3-YL) LACTATE
1	0.548	0.452	DB07160	N-{[(2S,3S)-3-(ETHOXYCARBONYL)OXIRAN-2-YL]CARBONYL}-L-ISOLEUCINE
1	0.548	0.452	DB07591	N1-CYCLOPENTYL-N2-(THIAZOL-2-YL)OXALAMIDE
1	0.548	0.452	DB08809	Dichloroacetic Acid
1	0.546	0.454	DB00236	Pipobroman
1	0.546	0.454	DB00566	Succimer
1	0.546	0.454	DB02173	Co(Iii)-(Deuteroporphyrin Ix)
1	0.546	0.454	DB02369	3-Aza-2,3-Dihydrogeranyl Diphosphate
1	0.546	0.454	DB02393	D-Gluco-2,5-Anhydro-1-Deoxy-1-Phosphonohexitol-6-Phosphate
1	0.546	0.454	DB02442	Dioxyselenocysteine
1	0.546	0.454	DB02490	(Diaminomethyl-Methyl-Amino)-Acetic Acid
1	0.546	0.454	DB02739	O-Phosphoglycolohydroxamate
1	0.546	0.454	DB03026	Phosphoglycolohydroxamic Acid
1	0.546	0.454	DB03088	Pyroglutamic Acid
1	0.546	0.454	DB03106	Myo-Inositol
1	0.546	0.454	DB03371	Modified Ribosylated Glutamyl Ester
1	0.546	0.454	DB03427	Delta-(L-Alpha-Aminoadipoyl)-L-Cysteinyl-D-Vinylglycine
1	0.546	0.454	DB04404	Allosamizoline
1	0.546	0.454	DB04423	Coproporphyrin I Containing Co(Iii)
1	0.546	0.454	DB04539	Glyphosate
1	0.546	0.454	DB07344	3,6,9,12,15-PENTAOXAHEPTADECAN-1-OL
1	0.546	0.454	DB07499	N-(4-{[amino(imino)methyl]amino}butyl)-2,4'-bi-1,3-thiazole-4-carboxamide
1	0.546	0.454	DB07960	5-ACETAMIDO-5,6-DIHYDRO-4-HYDROXY-6-ISOBUTOXY-4H-PYRAN-2-CARBOXYLIC ACID
1	0.546	0.454	DB08249	3,6,9,12,15-PENTAOXATRICOSAN-1-OL
1	0.546	0.454	DB08367	(R)-2-(FORMYLOXY)-3-(PHOSPHONOOXY)PROPYL PENTANOATE
1	0.546	0.454	DB08578	4-[(5-bromopyridin-2-yl)amino]-4-oxobutanoic acid
1	0.544	0.456	DB00200	Hydroxocobalamin
1	0.544	0.456	DB01821	L-N(Omega)-Nitroarginine-2,4-L-Diaminobutyric Amide
1	0.544	0.456	DB01857	Phosphoaspartate
1	0.544	0.456	DB01968	2-Thioethenamine
1	0.544	0.456	DB02523	5'-[[2-(Aminooxy)Ethyl]Methylsulfonio]-5'-Deoxy-Adenosine
1	0.544	0.456	DB02531	Isobutyric Acid
1	0.544	0.456	DB02552	Geranyl Diphosphate
1	0.544	0.456	DB03092	5-Hydroxymethyl-Chonduritol
1	0.544	0.456	DB03332	5,6-Cyclic-Tetrahydropteridine
1	0.544	0.456	DB03390	N-Propyl-Tartramic Acid
1	0.544	0.456	DB03713	Phosphorylated Aspartate
1	0.544	0.456	DB04151	4-Methyl-Histidine
1	0.544	0.456	DB04247	Aspartyl Phosphate
1	0.544	0.456	DB04305	2-Methyl-Propionic Acid
1	0.544	0.456	DB04418	Adenylosuccinic Acid
1	0.544	0.456	DB04551	Fructose-1,6-Diphosphate
1	0.544	0.456	DB04694	2,6-anhydro-3-deoxy-3-fluoronononic acid
1	0.544	0.456	DB04701	S-METHYL-GLUTATHIONE
1	0.544	0.456	DB07636	5-HEPTYL-6-HYDROXY-1,3-BENZOTHIAZOLE-4,7-DIONE
1	0.542	0.458	DB00413	Pramipexole
1	0.542	0.458	DB00703	Methazolamide
1	0.542	0.458	DB00710	Ibandronate
1	0.542	0.458	DB01423	Stepronin
1	0.542	0.458	DB01606	Tazobactam
1	0.542	0.458	DB01713	Udp-Alpha-D-Xylopyranose
1	0.542	0.458	DB01756	D-4-Phosphoerythronic Acid
1	0.542	0.458	DB01792	Adenylyl-3'-5'-Phospho-Uridine-3'-Monophosphate
1	0.542	0.458	DB01833	L-2-Amino-4-(Guanidinooxy)Butyric Acid
1	0.542	0.458	DB01868	Glycyl-L-a-Aminopimelyl-E-(D-2-Aminoethyl)Phosphonate
1	0.542	0.458	DB02027	N-{(4s)-4-Amino-5-[(2-Aminoethyl)Amino]Pentyl}-N'-Nitroguanidine
1	0.542	0.458	DB02077	L-N(Omega)-Nitroarginine-(4r)-Amino-L-Proline Amide
1	0.542	0.458	DB02109	Hadacidin
1	0.542	0.458	DB02120	6-Amino-4-Hydroxymethyl-Cyclohex-4-Ene-1,2,3-Triol
1	0.542	0.458	DB02337	S-(D-Carboxybutyl)-L-Homocysteine
1	0.542	0.458	DB02678	2-Deoxy-2-Aminogalactose
1	0.542	0.458	DB02853	D-Proline
1	0.542	0.458	DB02892	L-2-Amino-6-Methylene-Pimelic Acid
1	0.542	0.458	DB02904	Beta-3-Serine
1	0.542	0.458	DB03079	Alpha-Ribazole-5'-Phosphate Derivative
1	0.542	0.458	DB03097	Pmp-Hydroxyisoxazole, Pyridoxamine-5-Phosphate-Hydroxyisoxazole
1	0.542	0.458	DB03108	4-Phospho-D-Erythronate
1	0.542	0.458	DB03484	L-Alpha-Glycerophosphorylethanolamine
1	0.542	0.458	DB03687	4-Diphosphocytidyl-2-C-Methyl-D-Erythritol
1	0.542	0.458	DB03723	2'-Deoxy-Thymidine-Beta-L-Rhamnose
1	0.542	0.458	DB04087	Open Form of 2'-Deoxy-Ribofuranose-5'-Phosphate
1	0.542	0.458	DB04152	2-Amino-3-(3-Hydroxy-7,8-Dihydro-6h-Cyclohepta[D]-4-Isoxazolyl)Propionic Acid
1	0.542	0.458	DB04510	3-Phosphoglyceric Acid
1	0.542	0.458	DB04680	GALACTOSE GREASE
1	0.542	0.458	DB07928	N-(2-OXOTETRAHYDROFURAN-3-YL)OCTANAMIDE
1	0.542	0.458	DB08805	Metiamide
1	0.54	0.46	DB00144	Phosphatidylserine
1	0.54	0.46	DB00380	Dexrazoxane
1	0.54	0.46	DB01724	Reduced Threonine
1	0.54	0.46	DB01778	8-Amino-1,3-Dimethyl-3,7-Dihydropurine-2,6-Dione
1	0.54	0.46	DB01893	N6-Benzyl Adenosine-5'-Diphosphate
1	0.54	0.46	DB02111	3-Hydroxyisoxazole-4-Carboxylic Acid
1	0.54	0.46	DB02319	5,6-Dihydroxy-Nadp
1	0.54	0.46	DB02835	Alpha-D-Glucose 1,6-Bisphosphate
1	0.54	0.46	DB02894	Sulfamic Acid 2,3-O-(1-Methylethylidene)-4,5-O-Sulfonyl-Beta-Fructopyranose Ester
1	0.54	0.46	DB02940	(4s)-2-[(1e)-1-Aminoprop-1-Enyl]-4,5-Dihydro-1,3-Thiazole-4-Carboxylic Acid
1	0.54	0.46	DB02976	Uridine-5'-Monophosphate 2-Deoxy-2-Fluoro-Galactopyranosyl-Monophosphate Ester
1	0.54	0.46	DB03024	2-Methyl-3-(2-Aminothiazolo)Propanal
1	0.54	0.46	DB03244	(S)-2-[4-(Aminomethyl)-1h-1,2,3-Triazol-1-Yl]-4-Methylpentanoic Acid
1	0.54	0.46	DB03488	Uridine-5'-Diphosphate-2-Deoxy-2-Fluoro-Alpha-D-Galactose
1	0.54	0.46	DB03522	Aspartic Acid-4-Carboxymethyl Ester
1	0.54	0.46	DB03734	Xylarohydroxamate
1	0.54	0.46	DB03859	1-Thio-Beta-D-Glucopyranose
1	0.54	0.46	DB03942	Carboxylic PRPP
1	0.54	0.46	DB04223	Nitroarginine
1	0.54	0.46	DB04347	3-Dehydroshikimate
1	0.54	0.46	DB04535	Octaethylene glycol
1	0.54	0.46	DB06775	Carglumic acid
1	0.54	0.46	DB08222	METHOXYUNDECYLPHOSPHINIC ACID
1	0.538	0.462	DB00165	Pyridoxine
1	0.538	0.462	DB00226	Guanadrel Sulfate
1	0.538	0.462	DB00228	Enflurane
1	0.538	0.462	DB00585	Nizatidine
1	0.538	0.462	DB00742	Mannitol
1	0.538	0.462	DB01028	Methoxyflurane
1	0.538	0.462	DB01652	4-Hydroxybenzoyl Coenzyme A
1	0.538	0.462	DB01759	5-Hydroxy-2-(Hydroxymethyl)-4h-Pyran-4-One
1	0.538	0.462	DB01796	Quinolinic Acid
1	0.538	0.462	DB01971	(2e)-3-(1h-Imidazol-4-Yl)Acrylic Acid
1	0.538	0.462	DB02233	6-Hydroxy-D-Norleucine
1	0.538	0.462	DB02461	S-Methyl Phosphocysteine
1	0.538	0.462	DB02468	12-Phenylheme
1	0.538	0.462	DB02496	1-Deoxy-D-Xylulose-5-Phosphate
1	0.538	0.462	DB02590	Abequose
1	0.538	0.462	DB02606	2-Butanol
1	0.538	0.462	DB02645	3,4-Epoxybutyl-Alpha-D-Glucopyranoside
1	0.538	0.462	DB03043	(S)-2-Amino-3-(6h-Selenolo[2,3-B]-Pyrrol-4-Yl)-Propionic Acid
1	0.538	0.462	DB03099	5-Amino 6-Nitro Uracil
1	0.538	0.462	DB03101	Ribose-1-Phosphate
1	0.538	0.462	DB03412	6-Hydroxy-L-Norleucine
1	0.538	0.462	DB03556	2-(2-{2-[2-(2-{2-[2-(2-Ethoxy-Ethoxy)-Ethoxy]-Ethoxy}-Ethoxy)-Ethoxy]-Ethoxy}-Ethoxy)-Ethanol, Polyethyleneglycol Peg400
1	0.538	0.462	DB03611	L-2-Amino-4-Methoxy-Cis-but-3-Enoic Acid
1	0.538	0.462	DB03870	Ara-Alpha(1,3)-Xyl
1	0.538	0.462	DB03938	Deacetoxycephalosporin-C
1	0.538	0.462	DB03959	N,O6-Disulfo-Glucosamine
1	0.538	0.462	DB03970	(6,7-Dihydro-5h-Cyclopenta[D]Imidazo[2,1-B]Thiazol-2-Yl]-4,7-Dihydro[1,4]Thiazepine-3,6-Dicarboxylic Acid
1	0.538	0.462	DB03976	Phosphorylisopropane
1	0.538	0.462	DB04028	Tyvelose
1	0.538	0.462	DB04048	N-Carbamoyl-Alanine
1	0.538	0.462	DB04207	N-(5-Amino-5-Carboxypentyl)Glutamic Acid
1	0.538	0.462	DB04380	Diureido-Acetate
1	0.538	0.462	DB04478	Cp-166572, 2-Hydroxymethyl-4-(4-N,N-Dimethylaminosulfonyl-1-Piperazino)-Pyrimidine
1	0.538	0.462	DB04622	N-ACETYLHISTAMINE
1	0.538	0.462	DB07930	(3R)-3-HYDROXYDODECANOIC ACID
1	0.538	0.462	DB08612	1,1,1-TRIFLUORO-3-(OCTYLTHIO)ACETONE
1	0.536	0.464	DB00117	L-Histidine
1	0.536	0.464	DB01882	(2s)-2-Amino-4-(Methylsulfanyl)-1-Pyridin-2-Ylbutane-1,1-Diol
1	0.536	0.464	DB02057	AMPA
1	0.536	0.464	DB02122	4-iodo-acetamido phenylboronic acid
1	0.536	0.464	DB02172	2,5-Dideoxy-2,5-Imino-D-Glucitol
1	0.536	0.464	DB02396	Methylethylamine
1	0.536	0.464	DB02444	Icrf-187
1	0.536	0.464	DB02482	Phosphonothreonine
1	0.536	0.464	DB03003	Glutathione Sulfonic Acid
1	0.536	0.464	DB03057	Malonaldehyde
1	0.536	0.464	DB03379	2-Carboxyethylphosphonic Acid
1	0.536	0.464	DB03404	6,7-Dicarboxyl-1,2,3,4,5,8-Hexamethylhemin
1	0.536	0.464	DB03531	Flavin-Adenine Dinucleotide-N5-Isobutyl Ketone
1	0.536	0.464	DB03790	S-Dioxymethionine
1	0.536	0.464	DB04143	Indole-3-Glycerol Phosphate
1	0.536	0.464	DB04225	N-Methyldehydrobutyrine
1	0.536	0.464	DB04267	Dipicolinic Acid
1	0.536	0.464	DB04406	3-(Phosphonomethyl)Pyridine-2-Carboxylic Acid
1	0.536	0.464	DB04553	2-Oxobutanoic Acid
1	0.536	0.464	DB04585	DEHYDRO-2(S)-AMINO-6-BORONOHEXANOIC ACID
1	0.536	0.464	DB04633	N-ethyl-N-[3-(propylamino)propyl]propane-1,3-diamine
1	0.536	0.464	DB04786	Suramin
1	0.536	0.464	DB08098	{[5-(5-NITRO-2-FURYL)-1,3,4-OXADIAZOL-2-YL]THIO}ACETIC ACID
1	0.536	0.464	DB08620	{(2Z)-3-[(6-chloropyridin-3-yl)methyl]-1,3-thiazolidin-2-ylidene}cyanamide
1	0.534	0.466	DB01169	Arsenic trioxide
1	0.534	0.466	DB01690	Bis(Adenosine)-5'-Triphosphate
1	0.534	0.466	DB01894	5-N-Acetyl-Alpha-D-Neuraminic Acid
1	0.534	0.466	DB02156	Sulfopyruvate
1	0.534	0.466	DB02190	2-Oxalosuccinic Acid
1	0.534	0.466	DB02344	O-Sialic Acid (Chair Conformation)
1	0.534	0.466	DB02345	Selenocysteine
1	0.534	0.466	DB02401	4-Hydroxy-1,2,5-Oxadiazole-3-Carboxylic Acid
1	0.534	0.466	DB02447	3,8,9,10-Tetrahydroxy-7-Hydroxymethyl-6-Oxa-1,3-Diaza-Spiro[4.5]Decane-2,4-Dione
1	0.534	0.466	DB02576	F-Loop of Vitamin B12
1	0.534	0.466	DB03206	1-Deoxynojirimycin
1	0.534	0.466	DB03214	Vinylglycine
1	0.534	0.466	DB03249	2'-O-Methyl-3'-Methyl-3'-Deoxy-Arabinofuranosyl-Thymine-5'-Phosphate
1	0.534	0.466	DB03275	2-Amino-3-Mercapto-Propionamide
1	0.534	0.466	DB03586	5(R)-5-Fluoro-Beta-D-Xylopyranosyl-Enzyme Intermediate
1	0.534	0.466	DB03721	O-Sialic Acid
1	0.534	0.466	DB03955	1,5-Dideoxy-1,5-Imino-D-Mannitol
1	0.534	0.466	DB04097	Uridine-5'-Diphosphate-4-Deoxy-4-Fluoro-Alpha-D-Galactose
1	0.534	0.466	DB04265	Beta-Sialic Acid
1	0.534	0.466	DB04522	Phosphonoserine
1	0.534	0.466	DB04545	(3r,4r,5r)-5-(Hydroxymethyl)Piperidine-3,4-Diol
1	0.534	0.466	DB06867	3,6,9,12,15,18-HEXAOXAICOSANE
1	0.534	0.466	DB07367	(3Z,5S,6R,7S,8S,8aR)-3-(octylimino)hexahydro[1,3]oxazolo[3,4-a]pyridine-5,6,7,8-tetrol
1	0.534	0.466	DB07873	(1-HYDROXYDODECANE-1,1-DIYL)BIS(PHOSPHONIC ACID)
1	0.534	0.466	DB08090	(3Z,5S,6R,7S,8R,8aR)-3-(octylimino)hexahydro[1,3]oxazolo[3,4-a]pyridine-5,6,7,8-tetrol
1	0.534	0.466	DB08171	11-MERCAPTOUNDECANOIC ACID
1	0.532	0.468	DB00166	Lipoic Acid
1	0.532	0.468	DB00172	L-Proline
1	0.532	0.468	DB00753	Isoflurane
1	0.532	0.468	DB00916	Metronidazole
1	0.532	0.468	DB01646	N-Acetylmethionine
1	0.532	0.468	DB01651	Methyl 4,6-O-[(1r)-1-Carboxyethylidene]-Beta-D-Galactopyranoside
1	0.532	0.468	DB01847	N-Carbamyl-D-Valine
1	0.532	0.468	DB01861	Glucose-Uridine-C1,5'-Diphosphate
1	0.532	0.468	DB01983	2(S)-Amino-6-Boronohexanoic Acid
1	0.532	0.468	DB02397	O-(2-Acetamido-2-Deoxy-Alpha-D-Galactopyranosyl)-L-Serine
1	0.532	0.468	DB02421	Uridine-5'-Diphosphate-Mannose
1	0.532	0.468	DB02494	Alpha-Hydroxy-Beta-Phenyl-Propionic Acid
1	0.532	0.468	DB02533	Aminoguanidine
1	0.532	0.468	DB02768	Tert-Butyloxycarbonyl Group
1	0.532	0.468	DB02810	N-(2-Acetamido)Iminodiacetic Acid
1	0.532	0.468	DB02867	D-Mannose 1-Phosphate
1	0.532	0.468	DB02971	2-Amino-4-(2-Amino-Ethoxy)-Butyric Acid
1	0.532	0.468	DB03051	Tetrahydrofuran-2-Carboxylic Acid
1	0.532	0.468	DB03113	3-Fluoro-2-(Phosphonooxy)Propanoic Acid
1	0.532	0.468	DB03194	Beta-L-Methyl-Fucose
1	0.532	0.468	DB03458	N(4)-adenosyl-N(4)-methyl-2,4-diaminobutanoic acid
1	0.532	0.468	DB03473	N5-Methylglutamine
1	0.532	0.468	DB03501	Uridine Diphosphate Galactose
1	0.532	0.468	DB03513	(S)-2-Amino-3-(4h-Selenolo[3,2-B]-Pyrrol-6-Yl)-Propionic Acid
1	0.532	0.468	DB03582	N~2~-Succinylornithine
1	0.532	0.468	DB03613	4-Hydroxyphenacyl Coenzyme A
1	0.532	0.468	DB03847	Gamma-Carboxy-Glutamic Acid
1	0.532	0.468	DB03879	Alpha-L-Methyl-Fucose
1	0.532	0.468	DB04091	Alpha-L-1-Methyl-Fucose
1	0.532	0.468	DB04355	Uridine-5'-Monophosphate Glucopyranosyl-Monophosphateester
1	0.532	0.468	DB04422	2-Amino-4-Mercapto-Butyric Acid
1	0.532	0.468	DB04454	Alpha-Aminobutyric Acid
1	0.532	0.468	DB04663	2-KETO-6-PHOSPHATE-D-GLUCONIC ACID, ALPHA-FURANOSE FORM
1	0.532	0.468	DB06151	Acetylcysteine
1	0.532	0.468	DB07442	2-amino-7-(pyridin-3-ylmethyl)-3,5-dihydro-4H-pyrrolo[3,2-d]pyrimidin-4-one
1	0.532	0.468	DB07733	1-METHYL-3-TRIFLUOROMETHYL-1H-THIENO[2,3-C]PYRAZOLE-5-CARBOXYLIC ACID (2-MERCAPTO-ETHYL)-AMIDE
1	0.532	0.468	DB08323	3-OXO-N-[(3S)-2-OXOPYRROLIDIN-3-YL]DODECANAMIDE
1	0.532	0.468	DB08768	N-(3-METHYLBUT-2-EN-1-YL)-9H-PURIN-6-AMINE
1	0.53	0.47	DB00581	Lactulose
1	0.53	0.47	DB01709	2-Phosphoglyceric Acid
1	0.53	0.47	DB01714	N-Methyl-Lysine
1	0.53	0.47	DB01815	Nz-(Dicarboxymethyl)Lysine
1	0.53	0.47	DB01914	D-Glucose in Linear Form
1	0.53	0.47	DB02037	2,4-Diamino-4,6-Dihydroxypyrimidine
1	0.53	0.47	DB02079	(Aminooxy)Acetic Acid
1	0.53	0.47	DB02263	Glyceraldehyde-3-Phosphate
1	0.53	0.47	DB02368	N-Acetyl-L-Citrulline
1	0.53	0.47	DB02982	Bombykol
1	0.53	0.47	DB03004	1-[(1s)-Carboxy-2-(Methylsulfinyl)Ethyl]-(3r)-[(5s)-5-Amino-5-Carboxypentanamido]-(4r)-Sulfanylazetidin-2-One
1	0.53	0.47	DB03040	Nitrilotriacetic Acid
1	0.53	0.47	DB03419	Uracil
1	0.53	0.47	DB03465	2-Phospho-D-Glyceric Acid
1	0.53	0.47	DB03700	D-Threonine
1	0.53	0.47	DB03817	2,4-Diaminobutyric Acid
1	0.53	0.47	DB03826	5,6-Diaminouracil
1	0.53	0.47	DB04036	Coenzyme a Persulfide
1	0.53	0.47	DB04206	Nz2-Tryptophan
1	0.53	0.47	DB04304	Gluconic Acid
1	0.53	0.47	DB04383	L-Valinol
1	0.53	0.47	DB06889	3-(1H-tetrazol-5-ylmethyl)-5,6,7,8-tetrahydro[1]benzothieno[2,3-d]pyrimidin-4(3H)-one
1	0.53	0.47	DB07645	SEBACIC ACID
1	0.53	0.47	DB08661	1-(2,5-dideoxy-5-pyrrolidin-1-yl-beta-L-erythro-pentofuranosyl)-5-methylpyrimidine-2,4(1H,3H)-dione
1	0.528	0.472	DB00720	Clodronate
1	0.528	0.472	DB00851	Dacarbazine
1	0.528	0.472	DB01008	Busulfan
1	0.528	0.472	DB01638	D-Sorbitol
1	0.528	0.472	DB01727	Isocitric Acid
1	0.528	0.472	DB02264	O2-Sulfo-Glucuronic Acid
1	0.528	0.472	DB02405	12-Bromododecanoic Acid
1	0.528	0.472	DB02700	3-Deoxy-D-Glucosamine
1	0.528	0.472	DB02801	2,3 -Anhydro-Quinic Acid
1	0.528	0.472	DB02843	Alpha-D-Glucose-1-Phosphate
1	0.528	0.472	DB02985	8-Iodo-Guanine
1	0.528	0.472	DB03069	Cytidine-5'-Diphospho-Beta-D-Xylose
1	0.528	0.472	DB03171	Indole-3-Propanol Phosphate
1	0.528	0.472	DB03533	Glycoluril
1	0.528	0.472	DB03576	N-Pyridoxyl-Threonine-5-Monophosphate
1	0.528	0.472	DB03590	2,6-Diaminopimelic Acid
1	0.528	0.472	DB03799	Trifluoromethionine
1	0.528	0.472	DB03813	2-Decenoyl N-Acetyl Cysteamine
1	0.528	0.472	DB03833	2-Prolyl-5-Tert-Butyl-[1,3,4]Oxadiazole
1	0.528	0.472	DB03884	3-Phenylpyruvic Acid
1	0.528	0.472	DB03958	Mrna Cap Analog N7-Methyl Gpppg
1	0.528	0.472	DB04795	Thenoyltrifluoroacetone
1	0.528	0.472	DB07482	(2R)-N-[(2R)-2-(DIHYDROXYBORYL)-1-L-PROLYLPYRROLIDIN-2-YL]-N-[(5R)-5-(DIHYDROXYBORYL)-1-L-PROLYLPYRROLIDIN-2-YL]-L-PROLINAMIDE
1	0.528	0.472	DB07865	3-(1H-tetrazol-5-ylamino)cyclohex-2-en-1-one
1	0.528	0.472	DB07912	2-OXOHEPTYLPHOSPHONIC ACID
1	0.526	0.474	DB00129	L-Ornithine
1	0.526	0.474	DB00148	Creatine
1	0.526	0.474	DB00515	Cisplatin
1	0.526	0.474	DB01085	Pilocarpine
1	0.526	0.474	DB01206	Lomustine
1	0.526	0.474	DB01412	Theobromine
1	0.526	0.474	DB01829	Desulfo-Coenzyme A
1	0.526	0.474	DB01843	3-Amino-8,9,10-Trihydroxy-7-Hydroxymethyl-6-Oxa-1,3-Diaza-Spiro[4.5]Decane-2,4-Dione
1	0.526	0.474	DB01987	Thiamin Diphosphate
1	0.526	0.474	DB02219	3-Cyclohexyl-1-Propylsulfonic Acid
1	0.526	0.474	DB02434	4-(2-Thienyl)Butyric Acid
1	0.526	0.474	DB02501	N~2~-Succinylarginine
1	0.526	0.474	DB02547	Guanosine-5'-Diphosphate-Rhamnose
1	0.526	0.474	DB03105	5-Hydroxy Norvaline
1	0.526	0.474	DB03459	N-(Phosphonacetyl)-L-Aspartic Acid
1	0.526	0.474	DB03478	2'-O-Acetyl Adenosine-5-Diphosphoribose
1	0.526	0.474	DB03897	Hydroxyphenyl Propionic Acid
1	0.526	0.474	DB03935	1,4-Dideoxy-O2-Sulfo-Glucuronic Acid
1	0.526	0.474	DB04176	Phosporic Acid Mono-[3,4-Dihydroxy-5-(5-Methoxy-Benzoimidazol-1-Yl)-Tetrahydro-Furan-2-Ylmethyl] Ester
1	0.526	0.474	DB04201	Histidyl-Adenosine Monophosphate
1	0.526	0.474	DB04217	L-2-amino-3-butynoic acid
1	0.526	0.474	DB04351	Aconitate Ion
1	0.526	0.474	DB04742	NITROCEFIN
1	0.526	0.474	DB04762	N-PYRIDOXYL-D-GLUTAMIC ACID-5'-MONOPHOSPHATE
1	0.526	0.474	DB07904	2-HYDROXYCARBAMOYL-4-METHYL-PENTANOIC ACID
1	0.526	0.474	DB07954	3-ISOBUTYL-1-METHYLXANTHINE
1	0.526	0.474	DB08260	(1S,2R,3S,4R,5R)-2,3,4-trihydroxy-N-octyl-6-oxa-8-azabicyclo[3.2.1]octane-8-carbothioamide
1	0.526	0.474	DB08554	N-(3-CARBOXYPROPANOYL)-L-NORVALINE
1	0.524	0.476	DB00847	Cysteamine
1	0.524	0.476	DB01702	2-(3,4-Dihydroxyphenyl)Acetic Acid
1	0.524	0.476	DB01813	Pyridoxyl-Glutamic Acid-5'-Monophosphate
1	0.524	0.476	DB02202	1,3-Butanediol
1	0.524	0.476	DB02260	4-Oxosebacic Acid
1	0.524	0.476	DB02274	7-Keto-8-Aminopelargonic Acid
1	0.524	0.476	DB02515	3-Phosphoglycerol
1	0.524	0.476	DB02582	D-(L-a-Aminoadipoyl)-L-Cysteinyl-D-Isodehydrovaline
1	0.524	0.476	DB02649	3-Amino-3-Oxopropanoic Acid
1	0.524	0.476	DB02735	2-Amino-3-Oxo-4-Sulfo-Butyric Acid
1	0.524	0.476	DB03774	Glutamyl Group
1	0.524	0.476	DB04034	Ribulose-5-Phosphate
1	0.524	0.476	DB04205	Thymidine-3',5'-Diphosphate
1	0.524	0.476	DB04489	Guanidinoethylmercaptosuccinic acid
1	0.524	0.476	DB04700	GLUTATHIONE SULFINATE
1	0.524	0.476	DB04714	ISOPENTENYL PYROPHOSPHATE
1	0.524	0.476	DB04731	1-ACETYL-2-LYSO-SN-GLYCERO-3-PHOSPHOETHANOLAMINE
1	0.524	0.476	DB07004	2-[(5-hex-1-yn-1-ylfuran-2-yl)carbonyl]-N-methylhydrazinecarbothioamide
1	0.524	0.476	DB07939	N-(3-MERCAPTOPROPANOYL)-D-ALANINE
1	0.524	0.476	DB08501	DIETHYL PROPANE-1,3-DIYLBISCARBAMATE
1	0.522	0.478	DB00523	Alitretinoin
1	0.522	0.478	DB01736	[3-(Dodecanoylamino)Propyl](Hydroxy)Dimethylammonium
1	0.522	0.478	DB01783	N-[(2r)-2,4-Dihydroxy-3,3-Dimethylbutanoyl]-Beta-Alanine
1	0.522	0.478	DB01785	Dimethylallyl Diphosphate
1	0.522	0.478	DB01899	Nd1-Phosphonohistidine
1	0.522	0.478	DB01923	L-Xylulose 5-Phosphate
1	0.522	0.478	DB02124	(2s,3s)-Trans-2,3-Dihydro-3-Hydroxyanthranilic Acid
1	0.522	0.478	DB02298	5-Hydroxyamino-3-Methyl-Pyrrolidine-2-Carboxylic Acid
1	0.522	0.478	DB02308	4-(1,3,2-Dioxaborolan-2-Yloxy)Butan-1-Aminium
1	0.522	0.478	DB02814	3'-Deazo-Thiamin Diphosphate
1	0.522	0.478	DB02893	D-Methionine
1	0.522	0.478	DB02965	Ndelta-(N'-Sulphodiaminophosphinyl)-L-Ornithine
1	0.522	0.478	DB03236	(2s)-4-(Beta-Alanylamino)-2-Aminobutanoic Acid
1	0.522	0.478	DB03314	Fluorotryptophane
1	0.522	0.478	DB03710	N5-(1-Imino-3-Butenyl)-L-Ornithine
1	0.522	0.478	DB03715	Pentadecane
1	0.522	0.478	DB04058	D-[(Amino)Carbonyl]Phenylalanine
1	0.522	0.478	DB04388	4-Carboxy-4-Aminobutanal
1	0.522	0.478	DB04781	5-hydroxyvaleric acid
1	0.522	0.478	DB07205	N6-ISOPENTENYL-ADENOSINE-5'-MONOPHOSPHATE
1	0.522	0.478	DB07392	2-CHLORO-4-ISOPROPYLAMINO-6-ETHYLAMINO -1,3,5-TRIAZINE
1	0.522	0.478	DB07771	[(3,7,11-TRIMETHYL-DODECA-2,6,10-TRIENYLOXYCARBAMOYL)-METHYL]-PHOSPHONIC ACID
1	0.522	0.478	DB07979	(2E)-3-(3,4-DIHYDROXYPHENYL)-2-IMINOPROPANOIC ACID
1	0.522	0.478	DB08257	4-{[(CYCLOHEXYLAMINO)CARBONYL]AMINO}BUTANOIC ACID
1	0.522	0.478	DB08473	5,6-dichloro-1-beta-D-ribofuranosyl-1H-benzimidazole
1	0.522	0.478	DB08525	HYDROXY[3-(6-METHYLPYRIDIN-2-YL)PROPYL]FORMAMIDE
1	0.522	0.478	DB08627	(5R)-4-HYDROXY-3,5-DIMETHYL-5-[(1E,3E)-2-METHYLPENTA-1,3-DIENYL]THIOPHEN-2(5H)-ONE
1	0.522	0.478	DB08689	UBIQUINONE-1
1	0.522	0.478	DB08786	4-(2-methoxyethoxy)-6-methylpyrimidin-2-amine
1	0.52	0.48	DB00123	L-Lysine
1	0.52	0.48	DB00134	L-Methionine
1	0.52	0.48	DB00138	L-Cystine
1	0.52	0.48	DB01213	Fomepizole
1	0.52	0.48	DB01855	5-(Hydroxy-Methyl-Amino)-3-Methyl-Pyrrolidine-2-Carboxylic Acid
1	0.52	0.48	DB01904	D-Xylitol
1	0.52	0.48	DB01936	Ribose
1	0.52	0.48	DB02188	N-Methylmesoporphyrin Containing Copper
1	0.52	0.48	DB02198	2-Bromoacetyl Group
1	0.52	0.48	DB02283	2-Phenylamino-Ethanesulfonic Acid
1	0.52	0.48	DB02327	2-[2-(2-Hydroxy-Ethoxy)-Ethoxy]-Ethanol
1	0.52	0.48	DB02430	Trehalose-6-Phosphate
1	0.52	0.48	DB02486	2-Hydroxyethyl Disulfide
1	0.52	0.48	DB02497	L-Alpha-Glycerophosphorylserine
1	0.52	0.48	DB02522	Phosphonopyruvate
1	0.52	0.48	DB02613	Decylamine-N,N-Dimethyl-N-Oxide
1	0.52	0.48	DB02769	Alpha-L-Arabinofuranose
1	0.52	0.48	DB03059	Acetoacetyl-Coenzyme A
1	0.52	0.48	DB03135	[2(Formyl-Hydroxy-Amino)-Ethyl]-Phosphonic Acid
1	0.52	0.48	DB03335	1-Bromopropane-2-Ol
1	0.52	0.48	DB03386	4-Fluorotryptophane
1	0.52	0.48	DB03570	Tris-Hydroxymethyl-Methyl-Ammonium
1	0.52	0.48	DB03594	1,2,4-Triazole
1	0.52	0.48	DB03657	1-Deoxy-1-Methoxycarbamido-Beta-D-Glucopyranose
1	0.52	0.48	DB03673	Beta(2-Thienyl)Alanine
1	0.52	0.48	DB03733	Ethylene Dichloride
1	0.52	0.48	DB03747	3ar,5r,6s,7r,7ar-5-Hydroxymethyl-2-Methyl-5,6,7,7a-Tetrahydro-3ah-Pyrano[3,2-D]Thiazole-6,7-Diol
1	0.52	0.48	DB03760	Dihydrolipoic Acid
1	0.52	0.48	DB03792	5-Amino-1h-Pyrimidine-2,4-Dione
1	0.52	0.48	DB03795	2-Dehydropantoate
1	0.52	0.48	DB03861	(2r,3r,4s,5r)-2-Acetamido-3,4-Dihydroxy-5-Hydroxymethyl-Piperidinium
1	0.52	0.48	DB03863	2-O-Methyl Fucose
1	0.52	0.48	DB03967	Dodecyl Sulfate
1	0.52	0.48	DB04465	Lactose
1	0.52	0.48	DB04496	4-Phospho-D-Erythronohydroxamic Acid
1	0.52	0.48	DB04515	6-Deoxy-2-O-Methyl-Alpha-L-Galactopyranose
1	0.52	0.48	DB07291	5-amino-1-(4-chlorophenyl)-1H-pyrazole-4-carbonitrile
1	0.52	0.48	DB07652	1-[2-DEOXYRIBOFURANOSYL]-2,4-DIFLUORO-5-METHYL-BENZENE-5'MONOPHOSPHATE
1	0.52	0.48	DB07720	EPIBATIDINE
1	0.52	0.48	DB08139	5-chloro-7-[(1-methylethyl)amino]pyrazolo[1,5-a]pyrimidine-3-carbonitrile
1	0.52	0.48	DB08312	6-CYCLOHEXYLMETHYLOXY-5-NITROSO-PYRIMIDINE-2,4-DIAMINE
1	0.518	0.482	DB00118	S-Adenosylmethionine
1	0.518	0.482	DB00331	Metformin
1	0.518	0.482	DB00550	Propylthiouracil
1	0.518	0.482	DB00884	Risedronate
1	0.518	0.482	DB00992	Methyl aminolevulinate
1	0.518	0.482	DB01197	Captopril
1	0.518	0.482	DB01202	Levetiracetam
1	0.518	0.482	DB01849	3,4-Dihydrouracil
1	0.518	0.482	DB01880	3,4-Dihydroxycinnamic Acid
1	0.518	0.482	DB02068	Delta-Amino Valeric Acid
1	0.518	0.482	DB02160	S-Butyryl-Cystein
1	0.518	0.482	DB02216	S-Methylcysteine
1	0.518	0.482	DB02518	N-Acetylalanine
1	0.518	0.482	DB02542	(4s)-5-Fluoro-L-Leucine
1	0.518	0.482	DB02642	[[N-(Benzyloxycarbonyl)Amino]Methyl]Phosphate
1	0.518	0.482	DB02689	S-{2-[Amino(Dihydroxy)-Lambda~4~-Sulfanyl]Ethyl}-D-Cysteine
1	0.518	0.482	DB02838	3,4-Dihydro-2h-Pyrrolium-5-Carboxylate
1	0.518	0.482	DB03182	Alpha-Fluoro-Carboxymethyldethia Coenzyme a Complex
1	0.518	0.482	DB03408	Gamma-Glutamylcysteine
1	0.518	0.482	DB03479	8,9,10-Trihydroxy-7-Hydroxymethyl-3-Methyl-6-Oxa-1,3-Diaza-Spiro[4.5]Decane-2,4-Dione
1	0.518	0.482	DB03675	2,3-Dihydroxy-Valerianic Acid
1	0.518	0.482	DB03688	3-Hydroxy-Propanoic Acid
1	0.518	0.482	DB03731	S-2-(Boronoethyl)-L-Cysteine
1	0.518	0.482	DB03811	Histidinol
1	0.518	0.482	DB03821	2-Amino-3-Hydroxy-3-Phosphonooxy-Propionic Acid
1	0.518	0.482	DB04222	Sparsomycin
1	0.518	0.482	DB04370	S-sulphocysteine
1	0.518	0.482	DB04773	METHYL (3R)-3-{[(3R)-3-{[(3R)-3-HYDROXYBUTANOYL]OXY}BUTANOYL]OXY}BUTANOATE
1	0.518	0.482	DB06931	(1-HYDROXYNONANE-1,1-DIYL)BIS(PHOSPHONIC ACID)
1	0.518	0.482	DB07387	3-(BUTYLSULPHONYL)-PROPANOIC ACID
1	0.518	0.482	DB08075	4-(2-amino-1,3-thiazol-4-yl)pyrimidin-2-amine
1	0.518	0.482	DB08156	3-[4-(AMINOSULFONYL)PHENYL]PROPANOIC ACID
1	0.518	0.482	DB08256	N-[(CYCLOHEXYLAMINO)CARBONYL]GLYCINE
1	0.518	0.482	DB08263	N-(CARBOXYCARBONYL)-D-PHENYLALANINE
1	0.516	0.484	DB00173	Adenine
1	0.516	0.484	DB00202	Succinylcholine
1	0.516	0.484	DB00262	Carmustine
1	0.516	0.484	DB00350	Minoxidil
1	0.516	0.484	DB01440	Gamma Hydroxybutyric Acid
1	0.516	0.484	DB01687	Mannobiose
1	0.516	0.484	DB01856	Pimelic Acid
1	0.516	0.484	DB02018	Amido Phenyl Pyruvic Acid
1	0.516	0.484	DB02048	1,2,4-Triazole-Carboxamidine
1	0.516	0.484	DB02061	Cellobiose
1	0.516	0.484	DB02078	1-Methoxy-2-[2-(2-Methoxy-Ethoxy]-Ethane
1	0.516	0.484	DB02280	(R)-Mandelic Acid
1	0.516	0.484	DB02334	(R)-2-Hydroxy-3-Sulfopropanoic Acid
1	0.516	0.484	DB02644	N-Omega-Propyl-L-Arginine
1	0.516	0.484	DB02662	Novo Nordisk a/S Compound
1	0.516	0.484	DB02694	Pantoyl Adenylate
1	0.516	0.484	DB02743	Beta-1,4-Galactobioside
1	0.516	0.484	DB02758	Indolylpropionic Acid
1	0.516	0.484	DB02907	2-Amino-Vinyl-Phosphate
1	0.516	0.484	DB02958	Selenomethionine Selenoxide
1	0.516	0.484	DB02978	Beta-Hydroxyleucine
1	0.516	0.484	DB03237	2,3-Dihydroxy-5-Oxo-Hexanedioate
1	0.516	0.484	DB03323	Maltose
1	0.516	0.484	DB03357	(S)-Mandelic Acid
1	0.516	0.484	DB03376	'5'-O-(N-(L-Alanyl)-Sulfamoyl)Adenosine
1	0.516	0.484	DB03414	5-Thio-a/B-D-Mannopyranosylamine
1	0.516	0.484	DB03425	2s,4r-4-Methylglutamate
1	0.516	0.484	DB03864	Monothioglycerol
1	0.516	0.484	DB04001	6-(Oxalyl-Amino)-1h-Indole-5-Carboxylic Acid
1	0.516	0.484	DB07752	FARNESYL
1	0.516	0.484	DB07773	5-FLUOROINDOLE PROPANOL PHOSPHATE
1	0.516	0.484	DB08258	6-{[(CYCLOHEXYLAMINO)CARBONYL]AMINO}HEXANOIC ACID
1	0.516	0.484	DB08650	(1R,3S,5S,8R)-8-HYDROXY-2-OXABICYCLO[3.3.1]NON-6-ENE-3,5-DICARBOXYLIC ACID
1	0.514	0.486	DB00156	L-Threonine
1	0.514	0.486	DB00311	Ethoxzolamide
1	0.514	0.486	DB00389	Carbimazole
1	0.514	0.486	DB00988	Dopamine
1	0.514	0.486	DB01696	7,9-Dihydro-1h-Purine-2,6,8(3h)-Trione
1	0.514	0.486	DB01818	O3-Sulfonylgalactose
1	0.514	0.486	DB02530	Gamma(Amino)-Butyric Acid
1	0.514	0.486	DB02561	Beta-D-Fructopyranose
1	0.514	0.486	DB02619	Bromo-Dodecanol
1	0.514	0.486	DB03109	N-Acetyl-D-Allosamine
1	0.514	0.486	DB03252	D-Lysine
1	0.514	0.486	DB03392	(3,4,5-Trihydroxy-6-Hydroxymethyl-Tetrahydro-Pyran-2-Yl)-Phosphoramidic Acid Dimethyl Ester
1	0.514	0.486	DB03538	Nonaethylene Glycol
1	0.514	0.486	DB03567	N-Acetyl-2-Deoxy-2-Amino-Galactose
1	0.514	0.486	DB03628	ISO24
1	0.514	0.486	DB03689	Butyl Group
1	0.514	0.486	DB03740	2-(Acetylamino)-2-Deoxy-a-D-Glucopyranose
1	0.514	0.486	DB04101	N-[4-(2,4-Dimethyl-1,3-Thiazol-5-Yl)Pyrimidin-2-Yl]-N'-Hydroxyimidoformamide
1	0.514	0.486	DB04132	S-Hexylglutathione
1	0.514	0.486	DB04419	Norleucine
1	0.514	0.486	DB04719	DIMETHYL-(4,5,6,7-TETRABROMO-1H-BENZOIMIDAZOL-2-YL)-AMINE
1	0.514	0.486	DB07631	N-DODECYL-N,N-DIMETHYLGLYCINATE
1	0.514	0.486	DB08074	3-(3-methylbut-2-en-1-yl)-3H-purin-6-amine
1	0.514	0.486	DB08337	TERT-BUTYL [(1S)-2-METHYL-1-(1,3,4-OXADIAZOL-2-YL)PROPYL]CARBAMATE
1	0.514	0.486	DB08570	4-(ACETYLAMINO)-3-HYDROXY-5-NITROBENZOIC ACID
1	0.512	0.488	DB00150	L-Tryptophan
1	0.512	0.488	DB00885	Pemirolast
1	0.512	0.488	DB01353	Butethal
1	0.512	0.488	DB01355	Hexobarbital
1	0.512	0.488	DB01699	(4e)-4-Aminohex-4-Enoic Acid
1	0.512	0.488	DB01789	1-Amino-2,3-Dihydroxy-5-Hydroxymethyl Cyclohex-5-Ene
1	0.512	0.488	DB02065	4-Deoxylactose
1	0.512	0.488	DB02299	Arginineamide
1	0.512	0.488	DB02543	Pyrrole-2-Carboxylate
1	0.512	0.488	DB02696	6-Aminohexyl-Uridine-C1,5'-Diphosphate
1	0.512	0.488	DB02713	Acetylamino-Acetic Acid
1	0.512	0.488	DB02780	Beta-3-Cysteine
1	0.512	0.488	DB02885	4-Imino-5-Methidyl-2-Trifluoromethylpyrimidine
1	0.512	0.488	DB02931	Coa-S-Acetyl Tryptamine
1	0.512	0.488	DB03139	6-[5-(2-Oxo-Hexahydro-Thieno[3,4-D]Imidazol-4-Yl)-Pentanoylamino]-Hexanoic Acid
1	0.512	0.488	DB03963	S-(Dimethylarsenic)Cysteine
1	0.512	0.488	DB03991	2-Deoxy-2,3-Dehydro-N-Acetyl-Neuraminic Acid
1	0.512	0.488	DB04082	Decyloxy-Methanol
1	0.512	0.488	DB04320	2-Bromo-2-Propene-1-Ol
1	0.512	0.488	DB04403	Colamine Phosphoric Acid
1	0.512	0.488	DB04524	Malonyl-Coenzyme A
1	0.512	0.488	DB04560	4,7-Dioxosebacic Acid
1	0.512	0.488	DB04635	[1-HYDROXY-3-(METHYL-PENTYL-AMINO)-1-PHOSPHONO-PROPYL]-PHOSPHONIC ACID
1	0.512	0.488	DB07302	(9S,10E,12Z)-9-hydroxyoctadeca-10,12-dienoic acid
1	0.512	0.488	DB07922	N-oxo-2-(phenylsulfonylamino)ethanamide
1	0.512	0.488	DB07952	N-[1H-INDOL-3-YL-ACETYL]GLYCINE ACID
1	0.512	0.488	DB08576	1-(5-TERT-BUTYL-1,3,4-OXADIAZOL-2-YL)-2-(METHYLAMINO)ETHANONE
1	0.512	0.488	DB08648	8-HYDROXY-2-OXA-BICYCLO[3.3.1]NON-6-ENE-3,5-DICARBOXYLIC ACID
1	0.51	0.49	DB00544	Fluorouracil
1	0.51	0.49	DB00558	Zanamivir
1	0.51	0.49	DB01832	4-[Hydroxy-[Methyl-Phosphinoyl]]-3-Oxo-Butanoic Acid
1	0.51	0.49	DB01835	4r-Fluoro-N6-Ethanimidoyl-L-Lysine
1	0.51	0.49	DB01872	Acetylgalactosamine-4-Sulfate
1	0.51	0.49	DB02605	Pentaethylene Glycol Monodecyl Ether
1	0.51	0.49	DB02751	N-[Amino(Imino)Methyl]Glycine
1	0.51	0.49	DB02846	Thioproline
1	0.51	0.49	DB02961	L-Rhamnose
1	0.51	0.49	DB03049	S-Selanyl Cysteine
1	0.51	0.49	DB03094	3,5-Dihydro-5-Methylidene-4h-Imidazol-4-On
1	0.51	0.49	DB03095	Tetramethylammonium Ion
1	0.51	0.49	DB03117	2-Carboxypropyl-Coenzyme A
1	0.51	0.49	DB03411	2-Hydroxymethyl-Pyrrolidine-3,4-Diol
1	0.51	0.49	DB03855	L-Threonohydroxamate 4-Phosphate
1	0.51	0.49	DB03892	5-N-Allyl-Arginine
1	0.51	0.49	DB03931	Diguanosine-5'-Triphosphate
1	0.51	0.49	DB04386	4,6-O-(1-Carboxyethylidene)-Beta-D-Glucose
1	0.51	0.49	DB04455	Trimethyl Glycine
1	0.51	0.49	DB04492	2-(Acetylamino)-2-Deoxy-4-O-Sulfo-Alpha-D-Galactopyranose
1	0.51	0.49	DB04597	[4,6-O-(1-CARBOXYETHYLIDENE)-BETA-D-MANNOSE]
1	0.51	0.49	DB04720	S-METHYL-4,5,6,7-TETRABROMO-BENZIMIDAZOLE
1	0.51	0.49	DB04747	11-TRANS-13-TRANS-15-CIS-OCTADECATRIENOIC ACID
1	0.51	0.49	DB04749	2-(3-OXO-PROPYLSULFANYLCARBONYL)-ETHANETHIOLATE
1	0.51	0.49	DB06861	6-(2-HYDROXY-CYCLOPENTYL)-7-OXO-HEPTANAMIDINE
1	0.51	0.49	DB06906	2-AMINO-4-HYDROXYPYRIMIDINE-5-CARBOXYLIC ACID ETHYL ESTER
1	0.51	0.49	DB08668	3-(5-AMINO-3-IMINO-3H-PYRAZOL-4-YLAZO)-BENZOIC ACID
1	0.508	0.492	DB00149	L-Leucine
1	0.508	0.492	DB00260	Cycloserine
1	0.508	0.492	DB00534	Chlormerodrin
1	0.508	0.492	DB01077	Etidronic acid
1	0.508	0.492	DB01427	Amrinone
1	0.508	0.492	DB01631	Methyl Nonanoate (Ester)
1	0.508	0.492	DB01642	O1-Methyl-Glucose
1	0.508	0.492	DB01799	4-Hydroxy-3-Methyl Butyl Diphosphate
1	0.508	0.492	DB01979	O1-Methyl-Mannose
1	0.508	0.492	DB01985	N-Alpha-L-Acetyl-Arginine
1	0.508	0.492	DB02022	4-Amino-5-Hydroxymethyl-2-Methylpyrimidine
1	0.508	0.492	DB02028	L-Alpha-Glycerophospho-D-Myo-Inositol-4,5-Bis-Phosphate
1	0.508	0.492	DB02032	1-(3-Mercapto-2-Methyl-Propionyl)-Pyrrolidine-2-Carboxylic Acid
1	0.508	0.492	DB02100	Alpha-methyl-D-galactoside
1	0.508	0.492	DB02239	Laevulinic Acid
1	0.508	0.492	DB02247	Hydrolyzed Cephalothin
1	0.508	0.492	DB02257	N-Bromoacetyl-Aminoethyl Phosphate
1	0.508	0.492	DB02284	1-O-Methyl-Alpha-D-Mannose
1	0.508	0.492	DB02320	1-N-Acetyl-Beta-D-Glucosamine
1	0.508	0.492	DB02419	Ethyl Oxo(Piperidin-1-Yl)Acetate
1	0.508	0.492	DB02849	N-Pyridoxyl-1-Amino-Cyclopropanecarboxylic Acid-5-Monophosphate
1	0.508	0.492	DB02993	8-Methyl-9-Oxoguanine
1	0.508	0.492	DB03123	(R)-4-Amino-Isoxazolidin-3-One
1	0.508	0.492	DB03281	2'-Deoxymaltose
1	0.508	0.492	DB03292	D-2-Amino-3-Phosphono-Propionic Acid
1	0.508	0.492	DB03316	1,4-Diethylene Dioxide
1	0.508	0.492	DB03324	Beta-Methyl-D-Galactoside
1	0.508	0.492	DB03374	3,5-Diiodotyrosine
1	0.508	0.492	DB03544	S-Phosphocysteine
1	0.508	0.492	DB03637	Guanidine-3-Propanol
1	0.508	0.492	DB03639	1-Guanidinium-7-Aminoheptane
1	0.508	0.492	DB03923	Feruloyl Coenzyme A
1	0.508	0.492	DB03939	4-Hydroxy-3,4-Dihydro-1h-Pyrimidin-2-One
1	0.508	0.492	DB03946	3,4-Dihydroxybenzoic Acid
1	0.508	0.492	DB04046	Methyl-Beta-Galactose
1	0.508	0.492	DB04074	Alpha-ketoisovalerate
1	0.508	0.492	DB04096	5-Amino-5-Deoxy-Cellobiono-1,5-Lactam
1	0.508	0.492	DB04116	Allolactose
1	0.508	0.492	DB04153	S-Hydroxymethyl Glutathione
1	0.508	0.492	DB04171	D-Isovaline
1	0.508	0.492	DB04174	3'-1-Carboxy-1-Phosphonooxy-Ethoxy-Uridine-Diphosphate-N-Acetylglucosamine
1	0.508	0.492	DB04279	3-Isopropylmalic Acid
1	0.508	0.492	DB04290	[2-Cytidylate-O'-Phosphonyloxyl]-Ethyl-Trimethyl-Ammonium
1	0.508	0.492	DB06894	1-DODECANOL
1	0.508	0.492	DB06946	(2S,3S)-3-(4-fluorophenyl)-2,3-dihydroxypropanoic acid
1	0.508	0.492	DB08215	2-T-BUTYLAMINO-4-ETHYLAMINO-6-METHYLTHIO-S-TRIAZINE
1	0.508	0.492	DB08225	6-PIPERIDIN-1-YLPYRIMIDINE-2,4-DIAMINE 3-OXIDE
1	0.508	0.492	DB08336	TERT-BUTYL [(1R)-2-METHYL-1-(1,3,4-OXADIAZOL-2-YL)PROPYL]CARBAMATE
1	0.506	0.494	DB00152	Thiamine
1	0.506	0.494	DB00201	Caffeine
1	0.506	0.494	DB00464	Sodium Tetradecyl Sulfate
1	0.506	0.494	DB00548	Azelaic Acid
1	0.506	0.494	DB00627	Niacin
1	0.506	0.494	DB01655	L-Guluronic Acid 6-Phosphate
1	0.506	0.494	DB01805	Monoisopropylphosphorylserine
1	0.506	0.494	DB01841	4,6-Dideoxyglucose
1	0.506	0.494	DB01930	2,4-Dihydroxy-3,3-Dimethyl-Butyrate
1	0.506	0.494	DB02025	L-D-(a-Aminoadipoyl)-L-Cysteinyl-D-Valine
1	0.506	0.494	DB02076	6-Phosphogluconic Acid
1	0.506	0.494	DB02134	Xanthine
1	0.506	0.494	DB02347	2-Amino-3-(5-Tert-Butyl-3-(Phosphonomethoxy)-4-Isoxazolyl)Propionic Acid
1	0.506	0.494	DB02470	D-Glycero-D-Mannopyranose-7-Phosphate
1	0.506	0.494	DB02566	8-Hydroxy-4-(1-Hydroxyethyl)Quinoline-2-Carboxylic Acid
1	0.506	0.494	DB02955	Ricinoleic Acid
1	0.506	0.494	DB03184	5-Amino-3-Methyl-Pyrrolidine-2-Carboxylic Acid
1	0.506	0.494	DB03196	4-Nitrophenyl-Ara
1	0.506	0.494	DB03223	Diphthamide
1	0.506	0.494	DB03326	deoxycytidylyl-3',5'-guanosine
1	0.506	0.494	DB03360	N-Acetylproline
1	0.506	0.494	DB03548	3-Deoxy-D-Manno-Oct-2-Ulosonic Acid
1	0.506	0.494	DB03667	Acetic Acid Salicyloyl-Amino-Ester
1	0.506	0.494	DB03784	Elaidoylamide
1	0.506	0.494	DB04066	Para-Coumaric Acid
1	0.506	0.494	DB04067	4-Hydroxybenzyl Coenzyme A
1	0.506	0.494	DB04121	Guanosine-3'-Monophosphate-5'-Diphosphate
1	0.506	0.494	DB04126	N-[1-Hydroxycarboxyethyl-Carbonyl]Leucylamino-2-Methyl-Butane
1	0.506	0.494	DB04224	Oleic Acid
1	0.506	0.494	DB04369	1,3,2-Dioxaborolan-2-Ol
1	0.506	0.494	DB04798	THIO-ATPA
1	0.506	0.494	DB07073	5,5-dimethyl-2-morpholin-4-yl-5,6-dihydro-1,3-benzothiazol-7(4H)-one
1	0.506	0.494	DB07718	3-(4-HYDROXY-PHENYL)PYRUVIC ACID
1	0.506	0.494	DB07727	6-ethoxy-1,3-benzothiazole-2-sulfonamide
1	0.506	0.494	DB07896	(2S)-hydroxy(4-hydroxyphenyl)ethanoic acid
1	0.506	0.494	DB08120	6,8-DIMERCAPTO-OCTANOIC ACID AMIDE
1	0.506	0.494	DB08342	S-PALMITOYL-L-CYSTEINE
1	0.504	0.496	DB00755	Tretinoin
1	0.504	0.496	DB00982	Isotretinoin
1	0.504	0.496	DB01322	Kava
1	0.504	0.496	DB01717	Bis(Adenosine)-5'-Pentaphosphate
1	0.504	0.496	DB01758	3-Iodo-Tyrosine
1	0.504	0.496	DB02121	Butyramide
1	0.504	0.496	DB02176	Mercury Acetate Ion
1	0.504	0.496	DB02238	4-(Methylsulfanyl)-2-Oxobutanoic Acid
1	0.504	0.496	DB02294	(5r,6s,7s,8s)-5-Hydroxymethyl-6,7,8-Trihydroxy-Tetrazolo[1,5-a]Piperidine
1	0.504	0.496	DB02361	S-Methyl Thiocysteine Group
1	0.504	0.496	DB02415	N-Octyl-2-Hydroxyethyl Sulfoxide
1	0.504	0.496	DB02471	Nojirimycine Tetrazole
1	0.504	0.496	DB02508	Isopentyl Pyrophosphate
1	0.504	0.496	DB02625	(2r)-2-{[Formyl(Hydroxy)Amino]Methyl}Hexanoic Acid
1	0.504	0.496	DB02774	1,3-Propandiol
1	0.504	0.496	DB02782	1-Hydroxy-2-(3-Pyridinyl)Ethylidene Bis-Phosphonic Acid
1	0.504	0.496	DB03071	4-Methylidene-5-One
1	0.504	0.496	DB03204	5-(Aminomethyl)-2-Methylpyrimidin-4-Amine
1	0.504	0.496	DB03286	C-(1-Azido-Alpha-D-Glucopyranosyl) Formamide
1	0.504	0.496	DB03341	Coa-S-Acetyl 5-Bromotryptamine
1	0.504	0.496	DB03384	Fica
1	0.504	0.496	DB03416	Thiamin Phosphate
1	0.504	0.496	DB03502	(4s)-4-{[(2s)-2-Amino-3-Oxopropyl]Sulfanyl}-L-Homoserinate
1	0.504	0.496	DB03600	Decanoic Acid
1	0.504	0.496	DB03705	6-Methylamino-5-Nitroisocytosine
1	0.504	0.496	DB03741	2-Methylbutanoic Acid
1	0.504	0.496	DB03853	Azo-Dye Hapten
1	0.504	0.496	DB04072	Alpha-Methylisocitric Acid
1	0.504	0.496	DB04169	3,5-Diaminophthalhydrazide
1	0.504	0.496	DB04214	4-Nitrophenyl Phosphate
1	0.504	0.496	DB04262	3-(7-Hydroxy-8-Ribityllumazine-6-Yl) Propionic Acid
1	0.504	0.496	DB04401	[Formylmethyl]Trimethyl-Ammonium, N,N,N-Trimethylammonium Acetaldehyde
1	0.504	0.496	DB04516	2-Deoxy-Glucitol-6-Phosphate
1	0.504	0.496	DB07370	(3Z,5S,6R,7S,8R,8aS)-3-(octylimino)hexahydro[1,3]thiazolo[3,4-a]pyridine-5,6,7,8-tetrol
1	0.504	0.496	DB07529	2-IMINO-5-(1-PYRIDIN-2-YL-METH-(E)-YLIDENE)-1,3-THIAZOLIDIN-4-ONE
1	0.504	0.496	DB07911	(3E)-2,6-DIOXO-6-PHENYLHEX-3-ENOATE
1	0.504	0.496	DB07992	3-SULFOOXY-1H-INDOLE
1	0.504	0.496	DB08617	4-(2,2,2-TRIFLUOROETHYL)-L-PHENYLALANINE
1	0.502	0.498	DB00161	L-Valine
1	0.502	0.498	DB00277	Theophylline
1	0.502	0.498	DB00312	Pentobarbital
1	0.502	0.498	DB00419	Miglustat
1	0.502	0.498	DB01962	Phosphonotyrosine
1	0.502	0.498	DB02030	Alpha-Ribazole-5'-Phosphate
1	0.502	0.498	DB02074	Butenoic Acid
1	0.502	0.498	DB02210	Hexane-1,6-Diol
1	0.502	0.498	DB02248	3-Methyl-5-Sulfo-Pyrrolidine-2-Carboxylic Acid
1	0.502	0.498	DB02326	1-Hydroxyamine-2-Isobutylmalonic Acid
1	0.502	0.498	DB02433	{[(2,2-Dihydroxy-Ethyl)-(2,3,4,5-Tetrahydroxy-6-Phosphonooxy-Hexyl)-Amino]-Methyl}-Phosphonic Acid
1	0.502	0.498	DB02492	Ghavamiol
1	0.502	0.498	DB02624	Homoserine Lactone
1	0.502	0.498	DB02707	Pentyl Trihydrogen Diphosphate
1	0.502	0.498	DB02725	2-Amino-4-(4-Amino-Cyclohexa-2,5-Dienyl)-Butyric Acid
1	0.502	0.498	DB03019	4-(2,5-Dichloro-Thiophen-3-Yl)-Pyrimidin-2-Ylamine
1	0.502	0.498	DB03422	1,3-Thiazole-4-Carboxylic Acid
1	0.502	0.498	DB03660	Iodo-Phenylalanine
1	0.502	0.498	DB03856	Alpha-Difluoromethylornithine
1	0.502	0.498	DB03872	2,3-Dideoxyfucose
1	0.502	0.498	DB04235	4-Amino Hexanoic Acid
1	0.502	0.498	DB04486	(2s)-2,8-Diaminooctanoic Acid
1	0.502	0.498	DB04713	4-IODOPHENYLALANINE
1	0.502	0.498	DB06926	(9Z,11E,13S)-13-hydroxyoctadeca-9,11-dienoic acid
1	0.502	0.498	DB06979	5-(dodecylthio)-1H-1,2,3-triazole-4-carboxylic acid
1	0.502	0.498	DB07001	(3S,5E)-3-propyl-3,4-dihydrothieno[2,3-f][1,4]oxazepin-5(2H)-imine
1	0.502	0.498	DB07637	3,5 DIBROMOTYROSINE
1	0.502	0.498	DB07907	(2S)-2-HYDROXYOCTANOIC ACID
1	0.502	0.498	DB08593	1,2,5-THIADIAZOLIDIN-3-ONE-1,1-DIOXIDE
1	0.502	0.498	DB08606	(3R,4S)-1-[(4-AMINO-5H-PYRROLO[3,2-D]PYRIMIDIN-7-YL)METHYL]-4-[(METHYLSULFANYL)METHYL]PYRROLIDIN-3-OL
1	0.502	0.498	DB08779	2-(methylsulfanyl)-5-(thiophen-2-ylmethyl)-1H-imidazol-4-ol
1	0.5	0.5	DB00147	Pyridoxal
-1	0.5	0.5	DB00241	Butalbital
-1	0.5	0.5	DB00339	Pyrazinamide
1	0.5	0.5	DB00345	Aminohippurate
1	0.5	0.5	DB01291	Pirbuterol
1	0.5	0.5	DB01534	Chlorhexadol
1	0.5	0.5	DB01658	1'-Deazo-Thiamin Diphosphate
-1	0.5	0.5	DB01684	1-Hydroxy-1-Thio-Glycerol
1	0.5	0.5	DB01729	(1s,3s,4s)-1,3,4-Triphospho-Myo-Inositol
-1	0.5	0.5	DB01800	N,4-Dihydroxy-N-Oxo-3-(Sulfooxy)Benzenaminium
1	0.5	0.5	DB01870	1,4-Dithio-Alpha-D-Mannose
1	0.5	0.5	DB01969	Trifluoroacetonyl Coenzyme A
1	0.5	0.5	DB02005	2-Oxo-3-Pentenoic Acid
1	0.5	0.5	DB02270	Dimethylallyl S-Thiolodiphosphate
-1	0.5	0.5	DB02322	Heparin Disaccharide I-S
-1	0.5	0.5	DB02445	2-Deoxy-2-Amino Glucitol-6-Phosphate
1	0.5	0.5	DB02652	L-[(N-Hydroxyamino)Carbonyl]Phenylalanine
1	0.5	0.5	DB02839	2,4-Dihydroxybenzoic Acid
-1	0.5	0.5	DB02964	8,9,10-Trihydroxy-7-Hydroxymethyl-2-Thioxo-6-Oxa-1,3-Diaza-Spiro[4.5]Decan-4-One
-1	0.5	0.5	DB03009	2-[(2-Oxo-2-Piperidin-1-Ylethyl)Thio]-6-(Trifluoromethyl)Pyrimidin-4(1h)-One
1	0.5	0.5	DB03074	7-Deaza-7-Cyano-Guanine
1	0.5	0.5	DB03179	Sinapoyl Coenzyme A
1	0.5	0.5	DB03401	D-Myo-Inositol-1,4,5-Triphosphate
1	0.5	0.5	DB03447	Uridylyl-2'-5'-Phospho-Adenosine
1	0.5	0.5	DB03542	L-Myo-Inositol-1-Phosphate
-1	0.5	0.5	DB03624	7-(Carboxyamino)-8-Amino-Nonanoic Acid
1	0.5	0.5	DB03857	1,4-Deoxy-1,4-Dithio-Beta-D-Glucopyranose
-1	0.5	0.5	DB03869	5'-O-(N-(L-Seryl)-Sulfamoyl)Adenosine
-1	0.5	0.5	DB03956	D-Myo-Inositol-2,4,5-Trisphosphate
1	0.5	0.5	DB03964	4-Hydroxy-Aconitate Ion
1	0.5	0.5	DB04090	2,5-Diaziridin-1-Yl-3-(Hydroxymethyl)-6-Methylcyclohexa-2,5-Diene-1,4-Dione
-1	0.5	0.5	DB04117	4-(N,N-Dimethylamino)Cinnamoyl-Coa
1	0.5	0.5	DB04155	2-Fluoro-2-Deoxy-Beta-D-Galactopyranosyl-Beta-D-Glucopyranose
1	0.5	0.5	DB04188	MDL72527
1	0.5	0.5	DB04227	9-Amino-2-Deoxy-2,3-Dehydro-N-Acetyl-Neuraminic Acid
1	0.5	0.5	DB04316	D-[(N-Hydroxyamino)Carbonyl]Phenylalanine
-1	0.5	0.5	DB04436	3-Fluorotyrosine
1	0.5	0.5	DB04800	1-METHYL-3-PHENYL-1H-PYRAZOL-5-YLSULFAMIC ACID
1	0.5	0.5	DB06968	1,1'-HEXANE-1,6-DIYLBIS(1H-IMIDAZOLE)
1	0.5	0.5	DB07069	3-Hydroxyhippuric acid
-1	0.5	0.5	DB07339	(3S)-3-hydroxy-1-methyl-2,3-dihydro-1H-indole-5,6-dione
1	0.5	0.5	DB07416	(2S)-2-(BUTYRYLOXY)-3-HYDROXYPROPYL NONANOATE
-1	0.5	0.5	DB07621	(5-(PYRIDIN-3-YL)FURAN-2-YL)METHANAMINE
-1	0.5	0.5	DB07650	DECYL FORMATE
-1	0.5	0.5	DB08413	METHYL-PHOSPHONIC ACID MONO-(4-NITRO-PHENYL) ESTER
-1	0.5	0.5	DB08515	(3AR,6R,6AS)-6-((S)-((S)-CYCLOHEX-2-ENYL)(HYDROXY)METHYL)-6A-METHYL-4-OXO-HEXAHYDRO-2H-FURO[3,2-C]PYRROLE-6-CARBALDEHYDE
1	0.5	0.5	DB08638	2-AMINO-3-(1-HYDROPEROXY-1H-INDOL-3-YL)PROPAN-1-OL
-1	0.498	0.502	DB00395	Carisoprodol
-1	0.498	0.502	DB00426	Famciclovir
-1	0.498	0.502	DB00526	Oxaliplatin
-1	0.498	0.502	DB00951	Isoniazid
-1	0.498	0.502	DB01099	Flucytosine
-1	0.498	0.502	DB01245	Decamethonium
-1	0.498	0.502	DB01704	2,4-Dihydroxy-Trans Cinnamic Acid
-1	0.498	0.502	DB01762	Acetoacetic Acid
-1	0.498	0.502	DB01797	(2r)-2-(Aminomethyl)-2,4-Dihydroxy-5-Oxo-3-(2-Oxoethyl)-2,5-Dihydro-1h-Imidazol-3-Ium
-1	0.498	0.502	DB01798	Ethyl Dihydrogen Diphosphate
-1	0.498	0.502	DB01808	Thiarsahydroxy-Cysteine
-1	0.498	0.502	DB01840	2-Deoxy-D-Glucitol 6-(E)-Vinylhomophosphonate
-1	0.498	0.502	DB02245	7-Deazaguanine
-1	0.498	0.502	DB02302	N3, N4-Dimethylarginine
-1	0.498	0.502	DB02317	Alpha-D-Galactose-1-Phosphate
-1	0.498	0.502	DB02420	[[4-(Aminomethyl)Phenyl]Amino]Oxo-Acetic Acid,
-1	0.498	0.502	DB02556	D-Phenylalanine
-1	0.498	0.502	DB02568	Peldesine
-1	0.498	0.502	DB02663	2-Amino-4-(Hydroxymethyl-Phosphinyl)Butanoic Acid
-1	0.498	0.502	DB02701	Nicotinamide
-1	0.498	0.502	DB02762	RU79072
-1	0.498	0.502	DB02819	Mono-[3,4-Dihydroxy-5-(5-Methyl-Benzoimidazol-1-Yl)-Tetrahydor-Furan-2-Ylmethyl] Ester
-1	0.498	0.502	DB02914	(6e)-6-[(2e,4e,6e)-3,7-Dimethylnona-2,4,6,8-Tetraenylidene]-1,5,5-Trimethylcyclohexene
-1	0.498	0.502	DB03107	Beta-Alanine
-1	0.498	0.502	DB03210	4-Aminohydrocinnamic Acid
-1	0.498	0.502	DB03248	2-(Phosphonooxy)Butanoic Acid
-1	0.498	0.502	DB03266	Pentanedial
-1	0.498	0.502	DB03313	Cephalosporin C
-1	0.498	0.502	DB03321	4-Amino-2-Deoxy-2,3-Dehydro-N-Neuraminic Acid
-1	0.498	0.502	DB03415	3-Thiaoctanoyl-Coenzyme A
-1	0.498	0.502	DB03838	Capric Acid
-1	0.498	0.502	DB03883	Carboxyethyllumazine
-1	0.498	0.502	DB04025	3-Oxo-Butyric Acid
-1	0.498	0.502	DB04237	Tris(Hydroxyethyl)Aminomethane
-1	0.498	0.502	DB04396	Thiodigalactoside
-1	0.498	0.502	DB07722	3-(4-NITRO-PHENOXY)-PROPAN-1-OL
-1	0.498	0.502	DB08007	(2R)-3-{[(BENZYLAMINO)CARBONYL]AMINO}-2-HYDROXYPROPANOIC ACID
-1	0.498	0.502	DB08765	6-HYDROXY-1,3-BENZOTHIAZOLE-2-SULFONAMIDE
-1	0.496	0.504	DB00120	L-Phenylalanine
-1	0.496	0.504	DB00793	Haloprogin
-1	0.496	0.504	DB00869	Dorzolamide
-1	0.496	0.504	DB01354	Heptabarbital
-1	0.496	0.504	DB01682	6'-Methyl-Thiamin Diphosphate
-1	0.496	0.504	DB01701	1,2-Dichloro-Propane
-1	0.496	0.504	DB02088	Norleucine Phosphonate
-1	0.496	0.504	DB02137	Molybdenum Cofactor
-1	0.496	0.504	DB02376	D-Gluconhydroximo-1,5-Lactam
-1	0.496	0.504	DB02395	3-Hydroxymethyl-5-Aziridinyl-1methyl-2-[1h-Indole-4,7-Dione]-Propanol
-1	0.496	0.504	DB02525	D-Galactohydroximo-1,5-Lactam
-1	0.496	0.504	DB02684	5'-O-(N-(L-Cysteinyl)-Sulfamoyl)Adenosine
-1	0.496	0.504	DB02986	N-(2-Thienylmethyl)-2,5-Thiophenedisulfonamide
-1	0.496	0.504	DB03287	4-(2-Amino-Ethoxy)-2-[(3-Hydroxy-2-Methyl-5-Phosphonooxymethyl-Pyridin-4-Ylmethyl)-Amino]-but-3-Enoic Acid
-1	0.496	0.504	DB03407	4-Nitrocatechol
-1	0.496	0.504	DB03603	Glucarate
-1	0.496	0.504	DB03750	Isovaleric Acid
-1	0.496	0.504	DB03978	Tyrosinal
-1	0.496	0.504	DB04197	Descarboxy-nor-N(Omega)-Hydroxy-L-Arginine
-1	0.496	0.504	DB04211	3-Fluorosialic Acid
-1	0.496	0.504	DB04346	(2r,4s)-2-Methyl-2,3,3,4-Tetrahydroxytetrahydrofuran
-1	0.496	0.504	DB04381	Crotonaldehyde
-1	0.496	0.504	DB04559	N-(Chlorophenyl)-N'-Hydroxyguanidine
-1	0.496	0.504	DB04651	BIOTINOL-5-AMP
-1	0.496	0.504	DB04827	Ethyl carbamate
-1	0.496	0.504	DB06862	2-HYDROXY-5-(2-MERCAPTO-ETHYLSULFAMOYL)-BENZOIC ACID
-1	0.496	0.504	DB07224	N-{[(2S,3S)-3-(ETHOXYCARBONYL)OXIRAN-2-YL]CARBONYL}-L-ISOLEUCYL-L-ALANINE
-1	0.496	0.504	DB07347	4-(2-AMINOETHYL)BENZENESULFONYL FLUORIDE
-1	0.496	0.504	DB07391	(2S)-2-AMINO-1-(5-TERT-BUTYL-1,3,4-OXADIAZOL-2-YL)PROPAN-1-ONE
-1	0.496	0.504	DB07731	4-[(E)-(3,5-DIAMINO-1H-PYRAZOL-4-YL)DIAZENYL]PHENOL
-1	0.496	0.504	DB08571	4-(ACETYLAMINO)-5-AMINO-3-HYDROXYBENZOIC ACID
-1	0.496	0.504	DB08782	4-(2-AMINOETHYL)BENZENESULFONAMIDE
-1	0.494	0.506	DB00302	Tranexamic Acid
-1	0.494	0.506	DB00599	Thiopental
-1	0.494	0.506	DB00609	Ethionamide
-1	0.494	0.506	DB00686	Pentosan Polysulfate
-1	0.494	0.506	DB01955	1,4-Butanediol
-1	0.494	0.506	DB01963	Phenylethane Boronic Acid
-1	0.494	0.506	DB02024	3-phenylpropionic acid
-1	0.494	0.506	DB02083	Dimethylglycine
-1	0.494	0.506	DB02374	Xylose-Derived Imidazole
-1	0.494	0.506	DB02438	3-O-Methylfructose in Linear Form
-1	0.494	0.506	DB02503	4-(Carboxyvin-2-Yl)Phenylboronic Acid
-1	0.494	0.506	DB02563	Hexanoyl-Coenzyme A
-1	0.494	0.506	DB02740	3-Indolebutyric Acid
-1	0.494	0.506	DB02910	Octanoyl-Coenzyme A
-1	0.494	0.506	DB02992	1-Deoxy-6-O-Phosphono-1-[(Phosphonomethyl)Amino]-L-Threo-Hexitol
-1	0.494	0.506	DB03132	3-(2-Benzothiazolylthio)-1-Propanesulfonic Acid
-1	0.494	0.506	DB03293	9-Methyl Uric Acid
-1	0.494	0.506	DB03638	Cytidyl-2'-5'-Phospho-Guanosine
-1	0.494	0.506	DB03779	Glucosaminyl-(Alpha-6)-D-Myo-Inositol
-1	0.494	0.506	DB04164	1,4-Deoxy-4-((5-Hydroxymethyl-2,3,4-Trihydroxycyclohex-5-Enyl)Amino)Fructose
-1	0.494	0.506	DB04271	3,5-Dimethyl-1h-Pyrazole-4-Carboxylic Acid Ethyl Ester
-1	0.494	0.506	DB07057	(3S)-1-(2-hydroxyphenyl)-5-oxopyrrolidine-3-carboxylic acid
-1	0.494	0.506	DB07116	1-(2-DEOXY-5-O-PHOSPHONO-BETA-D-ERYTHRO-PENTOFURANOSYL)-4-METHYL-1H-INDOLE
-1	0.494	0.506	DB07532	N-hexanoyl-L-homoserine
-1	0.494	0.506	DB07900	3-FORMYL-2-HYDROXY-5-METHYL-HEXANOIC ACID HYDROXYAMIDE
-1	0.494	0.506	DB08548	[(4S)-2,2-DIMETHYL-1,3-DIOXOLAN-4-YL]METHYL HYDROGEN HEX-5-ENYLPHOSPHONATE
-1	0.492	0.508	DB00132	Alpha-Linolenic Acid
-1	0.492	0.508	DB01235	Levodopa
-1	0.492	0.508	DB01597	Cilastatin
-1	0.492	0.508	DB01613	Erythrityl Tetranitrate
-1	0.492	0.508	DB01715	7,8-Diamino-Nonanoic Acid
-1	0.492	0.508	DB01755	N-[Isoleucinyl]-N'-[Adenosyl]-Diaminosufone
-1	0.492	0.508	DB02151	Methionine Phosphonate
-1	0.492	0.508	DB02457	Undecyl-Phosphinic Acid Butyl Ester
-1	0.492	0.508	DB02541	4-Hydroxybutan-1-Aminium
-1	0.492	0.508	DB02622	2-(Oxalyl-Amino)-Benzoic Acid
-1	0.492	0.508	DB03042	5-Phosphoarabinonic Acid
-1	0.492	0.508	DB03193	Stearic acid
-1	0.492	0.508	DB03263	Thiocellobiose
-1	0.492	0.508	DB03327	{1-[(3-Hydroxy-Methyl-5-Phosphonooxy-Methyl-Pyridin-4-Ylmethyl)-Amino]-Ethyl}-Phosphonic Acid
-1	0.492	0.508	DB03385	4-Methylimidazole
-1	0.492	0.508	DB03662	Vitamin B6 Complexed with 2-Amino-Pentanoic Acid
-1	0.492	0.508	DB03699	Succinyl-Coenzyme A
-1	0.492	0.508	DB03983	(Molybdopterin-S,S)-Dioxo-Thio-Molybdenum(V)
-1	0.492	0.508	DB04106	Fotemustine
-1	0.492	0.508	DB04134	6-Amino Hexanoic Acid
-1	0.492	0.508	DB04195	Heptulose-2-Phosphate
-1	0.492	0.508	DB04241	N-Pyridoxyl-2-Methylalanine-5-Phosphate
-1	0.492	0.508	DB04275	N-Acetyl Serotonin
-1	0.492	0.508	DB04561	4-Acetamido-2,4-Didexoy-D-Glycero-Beta-D-Galacto-Octopyranosylphosphonic Acid
-1	0.492	0.508	DB06830	(1-HYDROXYHEPTANE-1,1-DIYL)BIS(PHOSPHONIC ACID)
-1	0.492	0.508	DB06893	1-DECANE-SULFONIC-ACID
-1	0.492	0.508	DB07055	2-[2-(1H-tetrazol-5-yl)ethyl]-1H-isoindole-1,3(2H)-dione
-1	0.492	0.508	DB07632	5-(2-chlorophenyl)-1,3,4-thiadiazole-2-sulfonamide
-1	0.492	0.508	DB07906	[(3R)-7-NITRO-1,2,3,4-TETRAHYDROISOQUINOLIN-3-YL]METHANOL
-1	0.492	0.508	DB08475	[(4R)-2,2-DIMETHYL-1,3-DIOXOLAN-4-YL]METHYL HYDROGEN HEX-5-ENYLPHOSPHONATE
-1	0.492	0.508	DB08684	O-DECYL HYDROGEN THIOCARBONATE
-1	0.49	0.51	DB00352	Thioguanine
-1	0.49	0.51	DB00707	Porfimer
-1	0.49	0.51	DB01325	Quinethazone
-1	0.49	0.51	DB01351	Amobarbital
-1	0.49	0.51	DB01483	Barbital
-1	0.49	0.51	DB02085	1-Aminocyclopropanecarboxylic Acid
-1	0.49	0.51	DB02357	Methyl-O3-(Alpha-D-Mannose)-Alpha-D-Mannose
-1	0.49	0.51	DB02370	Nz-(1-Carboxyethyl)-Lysine
-1	0.49	0.51	DB02394	Oxiranpseudoglucose
-1	0.49	0.51	DB02512	1,6-Fructose Diphosphate (Linear Form)
-1	0.49	0.51	DB02902	3'-Phosphate-Adenosine-5'-Phosphate Sulfate
-1	0.49	0.51	DB03007	9r,13r-Opda
-1	0.49	0.51	DB03245	S-4-Nitrobutyryl-Coa
-1	0.49	0.51	DB03299	N-Succinyl Phenylglycine
-1	0.49	0.51	DB03581	Glucose-6-Phosphate
-1	0.49	0.51	DB03674	Methyl Mercury Ion
-1	0.49	0.51	DB03676	Cystein-S-Yl Cacodylate
-1	0.49	0.51	DB03901	5-Oxo-Pyrrolidine-2-Carbaldehyde
-1	0.49	0.51	DB04080	RU78191
-1	0.49	0.51	DB04081	(4s-Trans)-4-(Methylamino)-5,6-Dihydro-6-Methyl-4h-Thieno(2,3-B)Thiopyran-2-Sulfonamide-7,7-Dioxide
-1	0.49	0.51	DB04133	Degraded Cephaloridine
-1	0.49	0.51	DB04356	9-Deazaguanine
-1	0.49	0.51	DB04681	BETA-METHYLLACTOSIDE
-1	0.49	0.51	DB04830	Buformin
-1	0.49	0.51	DB07617	N-METHYL(5-(PYRIDIN-3-YL)FURAN-2-YL)METHANAMINE
-1	0.49	0.51	DB07921	2-[(4-fluorophenyl)sulfonylamino]-N-oxo-ethanamide
-1	0.49	0.51	DB08368	OCTANE-1,3,5,7-TETRACARBOXYLIC ACID
-1	0.49	0.51	DB08667	4-(4-FLUORO-PHENYLAZO)-5-IMINO-5H-PYRAZOL-3-YLAMINE
-1	0.49	0.51	DB08711	VANILLATE
-1	0.488	0.512	DB00316	Acetaminophen
-1	0.488	0.512	DB00368	Norepinephrine
-1	0.488	0.512	DB00545	Pyridostigmine
-1	0.488	0.512	DB00856	Chlorphenesin
-1	0.488	0.512	DB00974	Edetic Acid
-1	0.488	0.512	DB01031	Ethinamate
-1	0.488	0.512	DB01738	O-Phosphoethanolamine
-1	0.488	0.512	DB01779	Glycerol-2-Phosphate
-1	0.488	0.512	DB01846	Oxidized Coenzyme A
-1	0.488	0.512	DB01881	2-Methylpentane-1,2,4-Triol
-1	0.488	0.512	DB02053	Ribose-5-Phosphate
-1	0.488	0.512	DB02377	Guanine
-1	0.488	0.512	DB02407	6-O-Cyclohexylmethyl Guanine
-1	0.488	0.512	DB02408	(3s)-3-Amino-1-(Cyclopropylamino)Heptane-2,2-Diol
-1	0.488	0.512	DB02480	(S)-4-Bromo-3-Hydroxy-3-Methylbutyl Diphosphate
-1	0.488	0.512	DB02630	L-Xylitol 5-Phosphate
-1	0.488	0.512	DB02667	Factor IIIm
-1	0.488	0.512	DB02786	2-Anhydro-3-Fluoro-Quinic Acid
-1	0.488	0.512	DB02856	Methyl-Carbamic Acid Ethyl Ester
-1	0.488	0.512	DB03203	Sphingosine
-1	0.488	0.512	DB03257	5-[1-(Acetylamino)-3-Methylbutyl]-2,5-Anhydro-3,4-Dideoxy-4-(Methoxycarbonyl)Pentonic Acid
-1	0.488	0.512	DB03420	2,4-Deoxy-4-Guanidino-5-N-Acetyl-Neuraminic Acid
-1	0.488	0.512	DB03455	(1h-Indol-3-Yl)-(2-Mercapto-Ethoxyimino)-Acetic Acid
-1	0.488	0.512	DB03518	(R)-Mevalonate
-1	0.488	0.512	DB03612	3-Hydroxybutyryl-Coenzyme A
-1	0.488	0.512	DB03745	Arabinose-5-Phosphate
-1	0.488	0.512	DB03793	Benzoic Acid
-1	0.488	0.512	DB04013	1-Deoxy-1-Methoxycarbamido-Beta-D-Gluco-2-Heptulopyranosonamide
-1	0.488	0.512	DB04015	Methionine Phosphinate
-1	0.488	0.512	DB04135	5-Fluoro-4-(S)-Hydroxy-3,4-Dihydropyrimidine
-1	0.488	0.512	DB04170	4-Bromo-3-Hydroxy-3-Methyl Butyl Diphosphate
-1	0.488	0.512	DB04236	2-Amino-3-(1h-Indol-3-Yl)-Propan-1-Ol
-1	0.488	0.512	DB04702	S-[(2E)-3,7-DIMETHYLOCTA-2,6-DIENYL] TRIHYDROGENTHIODIPHOSPHATE
-1	0.488	0.512	DB06782	Dimercaprol
-1	0.488	0.512	DB07114	4-[(METHYLSULFONYL)AMINO]BENZOIC ACID
-1	0.488	0.512	DB07209	(8R,9Z,12Z)-8-hydroxy-6-oxooctadeca-9,12-dienoic acid
-1	0.488	0.512	DB07408	5-(2-NITROPHENYL)-2-FUROIC ACID
-1	0.488	0.512	DB07802	3,8-DIBROMO-7-HYDROXY-4-METHYL-2H-CHROMEN-2-ONE
-1	0.488	0.512	DB07914	(2Z,4E)-2-HYDROXY-6-OXO-6-PHENYLHEXA-2,4-DIENOIC ACID
-1	0.488	0.512	DB07915	(2E,4E)-2-HYDROXY-6-OXO-6-PHENYLHEXA-2,4-DIENOIC ACID
-1	0.488	0.512	DB08327	2-(3,6-DIHYDROXYPHENYL)ACETIC ACID
-1	0.488	0.512	DB08636	(3E)-4-(2-HYDROXYPHENYL)-2-OXOBUT-3-ENOIC ACID
-1	0.488	0.512	DB08666	5-IMINO-4-(3-TRIFLUOROMETHYL-PHENYLAZO)-5H-PYRAZOL-3-YLAMINE
-1	0.488	0.512	DB08678	(4-ETHYLPHENYL)SULFAMIC ACID
-1	0.488	0.512	DB08695	3-(4-nitrophenyl)-1H-pyrazole
-1	0.488	0.512	DB08790	1-PHENYL-1H-PYRAZOLE-4-CARBOXYLIC ACID
-1	0.486	0.514	DB00272	Betazole
-1	0.486	0.514	DB00364	Sucralfate
-1	0.486	0.514	DB00437	Allopurinol
-1	0.486	0.514	DB00634	Sulfacetamide
-1	0.486	0.514	DB00697	Tizanidine
-1	0.486	0.514	DB00765	Metyrosine
-1	0.486	0.514	DB01686	N,N-dimethylarginine
-1	0.486	0.514	DB01823	Beta-D-Glucopyranose Spirohydantoin
-1	0.486	0.514	DB01863	Inositol 1,3,4,5-Tetrakisphosphate
-1	0.486	0.514	DB02251	O-Succinylbenzoate
-1	0.486	0.514	DB02387	3-Hydroxyphenylalanine
-1	0.486	0.514	DB02570	PD150606
-1	0.486	0.514	DB02671	1-Methylimidazole
-1	0.486	0.514	DB02697	Hydroxyaminovaline
-1	0.486	0.514	DB02806	2-Methoxyethanol
-1	0.486	0.514	DB02811	Diethylphosphono Group
-1	0.486	0.514	DB03050	Geran-8-Yl Geran
-1	0.486	0.514	DB03127	Benzamidine
-1	0.486	0.514	DB03265	Inositol-(1,3,4,5)-Tetrakisphosphate
-1	0.486	0.514	DB03298	Phenylphosphate
-1	0.486	0.514	DB03308	L-Leucyl-Hydroxylamine
-1	0.486	0.514	DB03361	2-{(9as)-9a-[(1s)-1-Hydroxyethyl]-2,7-Dimethyl-9a,10-Dihydro-5h-Pyrimido[4,5-D][1,3]Thiazolo[3,2-a]Pyrimidin-8-Yl}Ethyl Trihydrogen Diphosphate
-1	0.486	0.514	DB03430	(2s)-Hydroxy(4-Hydroxyphenyl)Ethanenitrile
-1	0.486	0.514	DB03433	{3-[(3-Hydroxy-2-Methyl-5-Phosphonooxymethyl-Pyridin-4-Ylmethyl)-Amino]-2-Methyl-Propyl}-Phosphonic Acid
-1	0.486	0.514	DB03552	Meta-Tyrosine
-1	0.486	0.514	DB03566	Spermidine
-1	0.486	0.514	DB03868	3-Dehydroquinic Acid
-1	0.486	0.514	DB03905	Succinamide-Coa
-1	0.486	0.514	DB03954	(S)-2-Hydroxy-2-Phenylpropionic Acid;(S)-Alpha-Methylmandelic Acid
-1	0.486	0.514	DB04345	7,8-dimethylalloxazine
-1	0.486	0.514	DB04526	L-Glycero-D-Manno-Heptopyranose
-1	0.486	0.514	DB04529	Desvancosaminyl Vancomycin
-1	0.486	0.514	DB04646	Dibromothymoquinone
-1	0.486	0.514	DB07674	O,O-DIETHYL HYDROGEN THIOPHOSPHATE
-1	0.486	0.514	DB07759	5-[2-(TRIFLUOROMETHYL)PHENYL]-2-FUROIC ACID
-1	0.486	0.514	DB07808	(1S,2R)-2-[(2,5-difluorophenyl)carbamoyl]cyclopropanecarboxylic acid
-1	0.486	0.514	DB07895	ALPHA-HYDROXYFARNESYLPHOSPHONIC ACID
-1	0.486	0.514	DB08378	4-[4-(2,5-DIOXO-PYRROLIDIN-1-YL)-PHENYLAMINO]-4-HYDROXY-BUTYRIC ACID
-1	0.486	0.514	DB08574	(5R)-2-SULFANYL-5-[4-(TRIFLUOROMETHYL)BENZYL]-1,3-THIAZOL-4-ONE
-1	0.484	0.516	DB00325	Nitroprusside
-1	0.484	0.516	DB00512	Vancomycin
-1	0.484	0.516	DB00513	Aminocaproic Acid
-1	0.484	0.516	DB00968	Methyldopa
-1	0.484	0.516	DB01352	Aprobarbital
-1	0.484	0.516	DB01672	2,3-Dihydroxy-Benzoic Acid
-1	0.484	0.516	DB01859	4-Diphosphocytidyl-2-C-Methyl-D-Erythritol 2-Phosphate
-1	0.484	0.516	DB01994	2-(Pyrido[1,2-E]Purin-4-Yl)Amino-Ethanol
-1	0.484	0.516	DB02091	4-(2,4-Dimethyl-Thiazol-5-Yl)-Pyrimidin-2-Ylamine
-1	0.484	0.516	DB02093	5-Phospho-D-Arabinohydroxamic Acid
-1	0.484	0.516	DB02229	5'-O-[(L-Methionyl)-Sulphamoyl]Adenosine
-1	0.484	0.516	DB02521	2,5,7-Trihydroxynaphthoquinone
-1	0.484	0.516	DB02710	2,3,-Dihydroxybenzoylserine
-1	0.484	0.516	DB02749	Pyromellitic Acid
-1	0.484	0.516	DB03053	1-Aminocyclopropylphosphonate
-1	0.484	0.516	DB03116	5-(1-Carboxy-1-Phosphonooxy-Ethoxyl)-Shikimate-3-Phosphate
-1	0.484	0.516	DB03158	D-Myo-Inositol-1,4-Bisphosphate
-1	0.484	0.516	DB03519	2-Amino-Pentanoic Acid
-1	0.484	0.516	DB03724	(1s,2s)-1-Amino-1-(1,3-Thiazol-2-Yl)Propan-2-Ol
-1	0.484	0.516	DB03839	D-Tyrosine
-1	0.484	0.516	DB03876	Thieno[2,3-B]Pyridine-2-Carboxamidine
-1	0.484	0.516	DB04053	Hypophosphite
-1	0.484	0.516	DB04103	3-Methylcytosine
-1	0.484	0.516	DB04185	Norvaline
-1	0.484	0.516	DB04472	(R)-1-Para-Nitro-Phenyl-2-Azido-Ethanol
-1	0.484	0.516	DB04507	(4s-Trans)-4-(Ethylamino)-5,6-Dihydro-6-Methyl-4h-Thieno(2,3-B)Thiopyran-2-Sulfonamide-7,7-Dioxide
-1	0.484	0.516	DB04514	Phosphoric Acid-2'-[2'-Deoxy-Uridine]Ester-5'-Guanosine Ester
-1	0.484	0.516	DB04531	Benzylcysteine
-1	0.484	0.516	DB04584	Phenyldehydroalanine
-1	0.484	0.516	DB04648	S-propylamine-L-cysteine
-1	0.484	0.516	DB04721	N1,N2-ETHYLENE-2-METHYLAMINO-4,5,6,7-TETRABROMO-BENZIMIDAZOLE
-1	0.484	0.516	DB07381	ATROLACTIC ACID (2-PHENYL-LACTIC ACID)
-1	0.484	0.516	DB07433	(TERT-BUTYLOXYCARBONYL)-ALANYL-AMINO ETHYL-FORMAMIDE
-1	0.484	0.516	DB07640	2-decyl-5,6-dimethoxy-3-methylcyclohexa-2,5-diene-1,4-dione
-1	0.484	0.516	DB07825	(3S)-1-(4-acetylphenyl)-5-oxopyrrolidine-3-carboxylic acid
-1	0.484	0.516	DB07897	1-(HYDROXYMETHYLENEAMINO)-8-HYDROXY-OCTANE
-1	0.484	0.516	DB08050	5-PHENYL-2-KETO-VALERIC ACID
-1	0.484	0.516	DB08677	N-(5-ISOPROPYL-THIAZOL-2-YL)-2-PYRIDIN-3-YL-ACETAMIDE
-1	0.484	0.516	DB08780	6-MORPHOLIN-4-YL-9H-PURINE
-1	0.482	0.518	DB00135	L-Tyrosine
-1	0.482	0.518	DB00235	Milrinone
-1	0.482	0.518	DB00740	Riluzole
-1	0.482	0.518	DB00993	Azathioprine
-1	0.482	0.518	DB01733	L-Phospholactate
-1	0.482	0.518	DB01746	D-Leucine
-1	0.482	0.518	DB01777	Coa-S-Trimethylene-Acetyl-Tryptamine
-1	0.482	0.518	DB01827	2,3,5,6-Tetrafluoro-4-Methoxy-Benzamide
-1	0.482	0.518	DB01854	5-Bromonicotinamide
-1	0.482	0.518	DB01924	Benzhydroxamic Acid
-1	0.482	0.518	DB01947	RU78262
-1	0.482	0.518	DB02164	N-Sulfo-Flavin Mononucleotide
-1	0.482	0.518	DB02268	4-(Acetylamino)-3-Amino Benzoic Acid
-1	0.482	0.518	DB02546	Vorinostat
-1	0.482	0.518	DB02792	Deglucobalhimycin
-1	0.482	0.518	DB02832	Siroheme
-1	0.482	0.518	DB02837	O4-Sulfonylgalactose
-1	0.482	0.518	DB02879	2,3-Di-O-Sulfo-Alpha-D-Glucopyranose
-1	0.482	0.518	DB03111	Glucosamine 1-Phosphate
-1	0.482	0.518	DB03352	S-Arsonocysteine
-1	0.482	0.518	DB03377	D-Galactose-4-Sulfate Group
-1	0.482	0.518	DB03506	9-Deazaadenine
-1	0.482	0.518	DB03563	Tetradecane
-1	0.482	0.518	DB03820	(2s,5r,6r)-6-{[(6r)-6-(Glycylamino)-7-Oxido-7-Oxoheptanoyl]Amino}-3,3-Dimethyl-7-Oxo-4-Thia-1-Azabicyclo[3.2.0]Heptane-2-Carboxylate
-1	0.482	0.518	DB04029	Phenylalanine Amide
-1	0.482	0.518	DB04104	3-Methyladenine
-1	0.482	0.518	DB04266	5-(6-D-Ribitylamino-2,4-Dihydroxypyrimidin-5-Yl)-1-Pentyl-Phosphonic Acid
-1	0.482	0.518	DB04768	Pyrithiamine Pyrophosphate
-1	0.482	0.518	DB04777	(R)-4-Nitrostyrene oxide
-1	0.482	0.518	DB04782	(S)-4-Nitrostyrene oxide
-1	0.482	0.518	DB04788	Tagetitoxin
-1	0.482	0.518	DB06952	(2S)-2-HYDROXY-2H-CHROMENE-2-CARBOXYLIC ACID
-1	0.482	0.518	DB07012	6-AMINO-3,7-DIHYDRO-IMIDAZO[4,5-G]QUINAZOLIN-8-ONE
-1	0.482	0.518	DB07384	1-ACETYL-2-CARBOXYPIPERIDINE
-1	0.482	0.518	DB07398	2-[(CYCLOPROPYLCARBONYL)AMINO]-4,5,6,7-TETRAHYDRO-1-BENZOTHIOPHENE-3-CARBOXAMIDE
-1	0.482	0.518	DB07730	5-(3-HYDROXYPHENYL)ISOTHIAZOL-3(2H)-ONE 1,1-DIOXIDE
-1	0.482	0.518	DB07767	3-(4-HYDROXY-3-METHOXYPHENYL)-2-PROPENOIC ACID
-1	0.482	0.518	DB07803	2-phenyl-1H-imidazole-4-carboxylic acid
-1	0.482	0.518	DB08326	2-(6-HYDROXY-1,3-BENZOTHIAZOL-2-YL)-1,3-THIAZOL-4(5H)-ONE
-1	0.482	0.518	DB08596	5'-deoxy-5'-piperidin-1-ylthymidine
-1	0.482	0.518	DB08652	2-(1H-INDOL-3-YL)ACETAMIDE
-1	0.48	0.52	DB00330	Ethambutol
-1	0.48	0.52	DB00411	Carbachol
-1	0.48	0.52	DB00418	Secobarbital
-1	0.48	0.52	DB00431	Lindane
-1	0.48	0.52	DB00859	Penicillamine
-1	0.48	0.52	DB00880	Chlorothiazide
-1	0.48	0.52	DB01679	Propyl Trihydrogen Diphosphate
-1	0.48	0.52	DB01740	2-Amino-4-Butyl-5-Propylselenazole
-1	0.48	0.52	DB01978	7,9-Dimethylguanine
-1	0.48	0.52	DB02070	L-2-Amino-4-[2-Aminophenyl]-4-Oxobutanoic Acid
-1	0.48	0.52	DB02126	4-Carboxycinnamic Acid
-1	0.48	0.52	DB02185	2,4-Dihydroxy-7-(Methyloxy)-2h-1,4-Benzoxazin-3(4h)-One
-1	0.48	0.52	DB02279	Benzoylformic Acid
-1	0.48	0.52	DB02399	L-Rhamnitol
-1	0.48	0.52	DB02483	Etheno-Nad
-1	0.48	0.52	DB02608	N-Acetyl-P-Nitrophenylserinol
-1	0.48	0.52	DB02666	(C8-R)-Hydantocidin 5'-Phosphate
-1	0.48	0.52	DB02746	Phthalic Acid
-1	0.48	0.52	DB02760	1,6-Di-O-Phosphono-D-Allitol
-1	0.48	0.52	DB02878	3-(2-Aminoethyl)-4-(Aminomethyl)Heptanedioic Acid
-1	0.48	0.52	DB02941	3-(1-Aminoethyl)Nonanedioic Acid
-1	0.48	0.52	DB03012	Phenylalanine-N-Sulfonamide
-1	0.48	0.52	DB03065	7-Nitroindazole-2-Carboxamidine
-1	0.48	0.52	DB03162	4-Hydroxy-1,2,5-Thiadiazole-3-Carboxylic Acid
-1	0.48	0.52	DB03165	2-Dimethylamino-Ethyl-Diphosphate
-1	0.48	0.52	DB03487	3-Aminosuccinimide
-1	0.48	0.52	DB03653	5-{[Ethyl(Methyl)Amino]Methyl}-2-Methyl-5,6-Dihydropyrimidin-4-Amine
-1	0.48	0.52	DB03698	5-Mercaptoethanol-2-Decenoyl-Coenzyme A
-1	0.48	0.52	DB03732	Etheno-Nadp
-1	0.48	0.52	DB03757	(Tert-Butyloxycarbonyl)-Alanyl-Alanyl-Amine
-1	0.48	0.52	DB03815	Fucitol
-1	0.48	0.52	DB03848	Benzenesulfonyl
-1	0.48	0.52	DB03919	Ethyl-Carbamic Acid Methyl Ester
-1	0.48	0.52	DB03992	3-(Benzoylamino)-L-Alanine
-1	0.48	0.52	DB04123	(P-Iodophenylacetylamino)Methylphosphinic Acid
-1	0.48	0.52	DB04277	Fructose -6-Phosphate
-1	0.48	0.52	DB04449	5-(3,3-Dihydroxypropeny)-3-Methoxy-Benzene-1,2-Diol
-1	0.48	0.52	DB04460	(C8-S)-Hydantocidin 5'-Phosphate
-1	0.48	0.52	DB04544	1-Deoxy-1-Acetylamino-Beta-D-Gluco-2-Heptulopyranosonamide
-1	0.48	0.52	DB04733	1,6-DI-O-PHOSPHONO-D-MANNITOL
-1	0.48	0.52	DB04746	(10E,12Z)-octadeca-10,12-dienoic acid
-1	0.48	0.52	DB06934	(1R)-3-chloro-1-phenylpropan-1-ol
-1	0.48	0.52	DB07898	2-(BUTYRYLOXY)-1-{[(TETRAHYDROXYPHOSPHORANYL)OXY]METHYL}ETHYL BUTYRATE
-1	0.48	0.52	DB08767	2-(4-METHOXYPHENYL)ACETAMIDE
-1	0.478	0.522	DB00167	L-Isoleucine
-1	0.478	0.522	DB00423	Methocarbamol
-1	0.478	0.522	DB00828	Fosfomycin
-1	0.478	0.522	DB01015	Sulfamethoxazole
-1	0.478	0.522	DB01634	2-Oxy-4-Hydroxy-5-(2-Hydrazinopyridine)Phenylalanine
-1	0.478	0.522	DB01650	trans-2-hydroxycinnamic acid
-1	0.478	0.522	DB01670	Propyl Acetate
-1	0.478	0.522	DB01739	Allo-Isoleucine
-1	0.478	0.522	DB01999	5,10,15,20-Tetrakis(4-Sulpfonatophenyl)-21h,23h-Porphine
-1	0.478	0.522	DB02459	4-Guanidinobenzoic Acid
-1	0.478	0.522	DB02485	Cytidine-5'-Monophosphate-5-N-Acetylneuraminic Acid
-1	0.478	0.522	DB02614	1(R)-1-Acetamido-2-(3-Carboxyphenyl)Ethyl Boronic Acid
-1	0.478	0.522	DB02787	N-Acetylmannosaminitol
-1	0.478	0.522	DB02852	Domoic Acid
-1	0.478	0.522	DB03380	L-Tyrosinamide
-1	0.478	0.522	DB03462	Thymine
-1	0.478	0.522	DB03517	[Methylthio]Acetate
-1	0.478	0.522	DB03568	Butanoic Acid
-1	0.478	0.522	DB03913	Coenzyme F420
-1	0.478	0.522	DB04157	N-[(Aminooxy)Carbonyl]Aniline
-1	0.478	0.522	DB04182	(S)-2-Amino-4-[(2s,3r)-2,3,5-Trihydroxy-4-Oxo-Pentyl]Mercapto-Butyric Acid
-1	0.478	0.522	DB04310	2-[(Formyl-Hydroxy-Amino)-Methyl]-Heptanoic Acid [1-(2-Hydroxymethyl-Pyrrolidine-1-Carbonyl)-2-Methyl-Propyl]-Amide
-1	0.478	0.522	DB04411	Alpha-N-Dichloroacetyl-P-Aminophenylserinol
-1	0.478	0.522	DB04801	(11E)-OCTADEC-11-ENOIC ACID
-1	0.478	0.522	DB06262	Droxidopa
-1	0.478	0.522	DB07103	2-(4-METHYLPHENOXY)ETHYLPHOSPHINATE
-1	0.476	0.524	DB00190	Carbidopa
-1	0.476	0.524	DB00273	Topiramate
-1	0.476	0.524	DB01018	Guanfacine
-1	0.476	0.524	DB01080	Vigabatrin
-1	0.476	0.524	DB01121	Phenacemide
-1	0.476	0.524	DB01902	1-Ethyl-Pyrrolidine-2,5-Dione
-1	0.476	0.524	DB02017	Imidazole-Derived Cellobiose
-1	0.476	0.524	DB02242	Cyclohexane Propionic Acid
-1	0.476	0.524	DB02353	Heparin Disaccharide Iii-S
-1	0.476	0.524	DB02514	(2z)-3-{[Oxido(Oxo)Phosphino]Oxy}-2-Phenylacrylate
-1	0.476	0.524	DB02724	Delta-2-Albomycin A1
-1	0.476	0.524	DB02742	Kifunensine
-1	0.476	0.524	DB02935	1-Methoxy-2-(2-Methoxyethoxy)Ethane
-1	0.476	0.524	DB02991	S-Ethyl-N-[4-(Trifluoromethyl)Phenyl]Isothiourea
-1	0.476	0.524	DB03027	7-Hydroxy-Pyrazolo[4,3-D]Pyrimidine
-1	0.476	0.524	DB03192	3r-Hydroxydecanoyl-Coa
-1	0.476	0.524	DB03764	4-Hydroperoxy-2-Methoxy-Phenol
-1	0.476	0.524	DB03988	2,6-Diamino-Hexanoic Acid Amide
-1	0.476	0.524	DB04253	CB1954
-1	0.476	0.524	DB04276	N-[N-[1-Hydroxycarboxyethyl-Carbonyl]Leucylamino-Butyl]-Guanidine
-1	0.476	0.524	DB04482	Cmp-2-Keto-3-Deoxy-Octulosonic Acid
-1	0.476	0.524	DB06912	UNDECA-3,7-DIENE-1,3,7,11-TETRACARBALDEHYDE
-1	0.476	0.524	DB07109	(2E)-3-(3-hydroxy-4-methoxyphenyl)prop-2-enoic acid
-1	0.476	0.524	DB07841	GERANYLGERANYL DIPHOSPHATE
-1	0.476	0.524	DB08060	4-(2-AMINOPHENYL)-4-OXOBUTANOIC ACID
-1	0.476	0.524	DB08175	(2E,4E)-11-METHOXY-3,7,11-TRIMETHYLDODECA-2,4-DIENOIC ACID
-1	0.476	0.524	DB08484	4-AMINO-N-[(2-SULFANYLETHYL)CARBAMOYL]BENZENESULFONAMIDE
-1	0.476	0.524	DB08599	N-[(4-methoxyphenyl)sulfonyl]-D-alanine
-1	0.476	0.524	DB08777	5,6,7,8-TETRAHYDRO[1]BENZOTHIENO[2,3-D]PYRIMIDIN-4(3H)-ONE
-1	0.474	0.526	DB00999	Hydrochlorothiazide
-1	0.474	0.526	DB01831	Tryptophanyl-5'amp
-1	0.474	0.526	DB02060	Cyclohexanone
-1	0.474	0.526	DB02171	D-Fructose-6-Phosphate (Open Form)
-1	0.474	0.526	DB02192	2-Phenyl-Ethanol
-1	0.474	0.526	DB02296	1-Hydroxy-3-Methylbutane
-1	0.474	0.526	DB02305	4,5-Dehydro-D-Glucuronic Acid
-1	0.474	0.526	DB02371	2-(2-Hydroxy-1,1-Dihydroxymethyl-Ethylamino)-Ethanesulfonic Acid
-1	0.474	0.526	DB02548	Sorbitol 6-phosphate
-1	0.474	0.526	DB02592	Carbaphosphonate
-1	0.474	0.526	DB02727	N-Butyl-N'-Hydroxyguanidine
-1	0.474	0.526	DB02975	Ge2270a
-1	0.474	0.526	DB02979	N1,N14-Bis((S-Methyl)Isothioureido)Tetradecane
-1	0.474	0.526	DB02988	Imino-Tryptophan
-1	0.474	0.526	DB03264	Dodecyl-Coa
-1	0.474	0.526	DB03344	Inositol-(1,3,4,5,6)-Pentakisphosphate
-1	0.474	0.526	DB03560	P-Hydroxybenzaldehyde
-1	0.474	0.526	DB03569	4,5-Dehydro-L-Iduronic Acid
-1	0.474	0.526	DB03618	2-(Acetylamino)-2-Deoxy-4-O-Beta-D-Galactopyranosyl-Alpha-D-Glucopyranose
-1	0.474	0.526	DB03644	3-Hydroxyanthranilic Acid
-1	0.474	0.526	DB03679	2-Hydroxy-Tryptophan
-1	0.474	0.526	DB04093	Undecanal
-1	0.474	0.526	DB04094	4-Hydroxy-2-Butanone
-1	0.474	0.526	DB04145	Pyridin-3-Ylmethanol
-1	0.474	0.526	DB04300	(1s,3r,4r,6s)-1,3,4,6-Tetrapkisphosphate
-1	0.474	0.526	DB04634	N-BENZYLOXYCARBONYL-L-SERINE-BETALACTONE
-1	0.474	0.526	DB04636	Glutamine t-butyl ester
-1	0.474	0.526	DB04799	5-n-undecyl-6-hydroxy-4,7-dioxobenzothiazole
-1	0.474	0.526	DB04878	Voglibose
-1	0.474	0.526	DB06885	3-[({(1E)-[2-(trifluoromethyl)phenyl]methylidene}amino)oxy]propanoic acid
-1	0.474	0.526	DB07171	5-(2-hydroxyethyl)nonane-1,9-diol
-1	0.474	0.526	DB07208	(8E,10S,12Z)-10-hydroxy-6-oxooctadeca-8,12-dienoic acid
-1	0.474	0.526	DB07305	5-(2-CHLORO-4-NITROPHENYL)-2-FUROIC ACID
-1	0.474	0.526	DB07380	1,1,1-TRIFLUORO-3-ACETAMIDO-4-PHENYL BUTAN-2-ONE(N-ACETYL-L-PHENYLALANYL TRIFLUOROMETHYL KETONE)
-1	0.474	0.526	DB07510	3-fluoro-6-(4-fluorophenyl)-2-hydroxy-6-oxohexa-2,4-dienoic acid
-1	0.474	0.526	DB07852	1-(3,5-DICHLOROPHENYL)-5-METHYL-1H-1,2,4-TRIAZOLE-3-CARBOXYLIC ACID
-1	0.472	0.528	DB00189	Ethchlorvynol
-1	0.472	0.528	DB00233	Aminosalicylic Acid
-1	0.472	0.528	DB00259	Sulfanilamide
-1	0.472	0.528	DB00754	Ethotoin
-1	0.472	0.528	DB00779	Nalidixic Acid
-1	0.472	0.528	DB01332	Ceftizoxime
-1	0.472	0.528	DB01648	O1-Methyl-4-Deoxy-4-Thio-Beta-D-Glucose
-1	0.472	0.528	DB01667	8-Azaguanine
-1	0.472	0.528	DB01685	4-[5-Pyridin-4-Yl-1h-[1,2,4]Triazol-3-Yl]-Pyridine-2-Carbonitrile
-1	0.472	0.528	DB01901	Sucrose Octasulfate
-1	0.472	0.528	DB01917	Putrescine
[truncated: 4,513 more rows]
