# Supplementary material for: A Systematic Prediction of Multiple Drug-Target Interactions from Chemical, Genomic, and Pharmacological Data
Source: PLoS One. 2012 May 30;7(5):e37608. doi: 10.1371/journal.pone.0037608 (PMC3364341; doi:10.1371/journal.pone.0037608)
Supplement: Supporting Information S17 — The clustering analysis results of the predicted drugs for Thymidine kinase. (XLSX) [file pone.0037608.s017.xlsx]

## Sheet: Sheet1
Table S14. The clustering analysis results of the predicted drugs for Thymidine kinase
Cluster	Drug DrugBank ID	Drug generic name
A	DB00157	NADH
A	DB01907	Nicotinamide-Adenine-Dinucleotide
A	DB03431	Adenosine-5'-Diphosphate
A	DB04315	Guanosine-5'-Diphosphate
A	DB03461	2'-Monophosphoadenosine 5'-Diphosphoribose
B	DB04184	Acetate Ion
C	DB02577	Mesoheme
C	DB03014	Heme
A	DB02332	Flavin-N7 Protonated-Adenine Dinucleotide
A	DB03147	Flavin-Adenine Dinucleotide
A	DB04099	Deamido-Nad+
B	DB00249	Idoxuridine
B	DB01942	Formic Acid
A	DB03020	5-Beta-D-Ribofuranosylnicotinamide Adenine Dinucleotide
A	DB01992	Coenzyme A
B	DB03166	Acetic acid
A	DB00171	Adenosine triphosphate
A	DB02623	Aminophosphonic Acid-Guanylate Ester
A	DB03280	P1-(5'-Adenosyl)P5-(5'-Thymidyl)Pentaphosphate
B	DB02379	Beta-D-Glucose
B	DB02687	Beta-D-Mannose
B	DB02944	Alpha-D-Mannose
B	DB03989	D-Allopyranose
A	DB04395	Phosphoaminophosphonic Acid-Adenylate Ester
B	DB00194	Vidarabine
B	DB00299	Penciclovir
B	DB00640	Adenosine
B	DB03778	5-Iododeoxyuridine
B	DB03122	B-Octylglucoside
A	DB03363	3-Acetylpyridine Adenine Dinucleotide
B	DB00577	Valaciclovir
B	DB02325	Isopropyl Alcohol
B	DB04402	2-Propanol, Isopropanol
B	DB00145	Glycine
A	DB01860	Cordycepin Triphosphate
B	DB02736	Acetamide
B	DB03131	Beta-Mercaptoethanol
B	DB03345	2-Sulfhydryl-Ethanol
A	DB01643	Thymidine-5'-Phosphate
B	DB03152	B-2-Octylglucoside
C	DB03317	Heme C
B	DB04485	Deoxythymidine
B	DB00787	Aciclovir
B	DB01730	9-(4-Hydroxy-3-(Hydroxymethyl)but-1-Yl)Guanine
B	DB01004	Ganciclovir
B	DB07923	octyl alpha-L-altropyranoside
B	DB07924	octyl beta-D-galactopyranoside
B	DB01265	Telbivudine
A	DB04071	Cpad
A	DB04366	3'-Deoxy 3'-Amino Adenosine-5'-Diphosphate
B	DB03085	Hydroxyacetic Acid
A	DB03800	2'-deoxyuridylic acid
A	DB04137	Guanosine-5'-Triphosphate
A	DB01960	7n-Methyl-8-Hydroguanosine-5'-Diphosphate
B	DB07378	4-AMINO-2-OCTYLOXY-6-HYDROXYMETHYL-TETRAHYDRO-PYRAN-3,5-DIOL
B	DB03226	Trifluoroethanol
A	DB02324	5-Iodo-2'-Deoxyuridine-5'-Monophosphate
B	DB03564	(4r)-2-Methylpentane-2,4-Diol
B	DB03684	2-Methyl-2,4-Pentanediol
A	DB02732	Nicotinamide Adenine Dinucleotide Acetone Adduct
A	DB00114	Pyridoxal Phosphate
B	DB01752	S-Adenosyl-L-Homocysteine
A	DB03233	Phosphoric Acid Mono-[3-Amino-5-(5-Methyl-2,4-Dioxo-3,4-Dihydro-2h-Pyrimidin-1-Yl)-Tetrahydro-Furan-2-Ylmethyl] Ester
A	DB01763	Tatp
A	DB03761	5-Fluoro-2'-Deoxyuridine-5'-Monophosphate
B	DB04147	Lauryl Dimethylamine-N-Oxide
B	DB00322	Floxuridine
B	DB00551	Acetohydroxamic Acid
A	DB02363	2'-Monophosphoadenosine-5'-Diphosphate
A	DB02431	Cytidine-5'-Triphosphate
A	DB03527	Nicotinamide-Adenine-Dinucleotide (Acidic Form)
A	DB03222	2'-Deoxyadenosine 5'-Triphosphate
A	DB02456	Cytosine Arabinose-5'-Phosphate
A	DB03403	Cytidine-5'-Monophosphate
B	DB04272	Citric Acid
B	DB04399	Cacodylate Ion
A	DB00131	Adenosine monophosphate
A	DB01812	Adenosine-3'-5'-Diphosphate
A	DB01972	Guanosine-5'-Monophosphate
A	DB02059	Adenosine-5-Diphosphoribose
A	DB02181	2'-Deoxyguanosine-5'-Triphosphate
B	DB03312	5-Bromovinyldeoxyuridine
B	DB00142	L-Glutamic Acid
B	DB01629	5-Fluorouridine
B	DB02502	8-Hydroxy-2'-Deoxyguanosine
B	DB03763	5-Methyl-2'-Deoxypseudouridine
A	DB01903	5-Bromo-2'-Deoxyuridine-5'-Monophosphate
B	DB02256	2'-Deoxyuridine
B	DB02753	Selenoinosine
A	DB03258	2'-Deoxycytidine-5'-Triphosphate
B	DB02679	Cyanamide
A	DB03798	2'-Deoxycytidine-5'-Monophosphate
A	DB04280	((2r,3s,5r)-3-Hydroxy-5-(4-Hydroxy-2-Oxo-3,4-Dihydropyrimidin-1(2h)-Yl)-Tetrahydrofuran-2-Yl)Methyldihydrogen Phosphate
B	DB01093	Dimethyl sulfoxide
A	DB02189	2',3'-Dideoxyadenosine-5'-Triphosphate
B	DB02451	B-Nonylglucoside
A	DB03685	Uridine-5'-Monophosphate
A	DB04555	Cytidine-5'-Diphosphate
B	DB01262	Decitabine
A	DB01693	Ribavirin Monophosphate
A	DB01864	5'-Guanosine-Diphosphate-Monothiophosphate
A	DB02082	Phosphoaminophosphonic Acid Guanylate Ester
A	DB03845	P1-(5'-Adenosyl)P5-(5'-(3'azido-3'-Deoxythymidyl))Pentaphosphate
B	DB04343	Glyoxalate, Glyoxylate
B	DB02994	Hydroxydimethylarsine Oxide
A	DB03708	Adenosine-5'-Phosphosulfate
B	DB00119	Pyruvic acid
A	DB02338	Nadph Dihydro-Nicotinamide-Adenine-Dinucleotidephosphate
A	DB02607	Adenosine Phosphonoacetic Acid
B	DB02857	Guanosine
B	DB03273	3'-Oxo-Adenosine
B	DB03528	9-Beta-D-Xylofuranosyl-Adenine
A	DB03247	Riboflavin Monophosphate
A	DB01660	Adenosine-5'-Diphosphate Monothiophosphate
C	DB02182	Hybrid Between B and C Type Hemes (Protoporphyrin Ixcontaining Fe)
B	DB02281	Formycin
A	DB02452	Thymidine-5'-Triphosphate
A	DB03150	2',3'-Dideoxythymidine-5'-Monophosphate
A	DB03435	Uridine-5'-Diphosphate
B	DB03587	Pyruvoyl Group
B	DB04198	Formycin B
A	DB04243	5-Methyluridine 5'-Monophosphate
D	DB00552	Pentostatin
B	DB02646	Nitrosoethane
A	DB03486	Phosphomethylphosphonic Acid Guanosyl Ester
A	DB03592	Pterin-6-Yl-Methyl-Monophosphate
A	DB03726	Purine Riboside-5'-Monophosphate
B	DB03814	2-(N-Morpholino)-Ethanesulfonic Acid
B	DB04425	7,8-Dihydroneopterin
A	DB08432	THYMIDINE-5'-THIOPHOSPHATE
B	DB00432	Trifluridine
B	DB03902	Oxalic Acid
A	DB03948	6-Chloropurine Riboside, 5'-Monophosphate
B	DB04261	Carbamic Acid
B	DB00928	Azacitidine
A	DB01700	Aicar
B	DB02765	9-Hydroxypropyladenine, R-Isomer
B	DB03000	9-Hydroxypropyladenine, S-Isomer
B	DB03716	5'-Fluoro-5'-Deoxyadenosine
B	DB02472	6-Hydroxy-7,8-Dihydro Purine Nucleoside
A	DB02596	Alpha,Beta-Methyleneadenosine-5'-Triphosphate
B	DB02745	Uridine
B	DB02831	Dihydrogenphosphate Ion
B	DB03769	D-Eritadenine
A	DB03829	Pseudouridine-5'-Monophosphate
A	DB04566	Inosinic Acid
A	DB04672	cyclic 3',5'-thymidine monophosphate
A	DB01995	5-Methylcytidine-5'-Monophosphate
B	DB02796	9-Deazainosine
A	DB02890	6-Hydroxyuridine-5'-Phosphate
B	DB00242	Cladribine
B	DB00441	Gemcitabine
A	DB03718	6-Aza-Ump
B	DB03940	Oxamic Acid
A	DB04005	Uridine 5'-Triphosphate
A	DB04060	(5-Methyl-6-Oxo-1,6-Dihydro-Pyridin-3-Yl)-1,2-Dideoxy-Ribofuranose-5-Monophosphate
B	DB04102	2-Amino-Adenosine
B	DB00442	Entecavir
B	DB00987	Cytarabine
A	DB02023	8-Oxo-2'-Deoxy-Guanosine-5'-Monophosphate
B	DB02097	Cytidine
C	DB02199	1,3-Dedimethyl-1,3-Divinyl Heme
A	DB02454	5-(6-Amino-9h-Purin-9-Yl)-4-Hydroxytetrahydrofuran-3-Yl Dihydrogen Phosphate
B	DB02517	D-Glutamic Acid
A	DB02569	2',3'-Dehydro-2',3'-Deoxy-Thymidine 5'-Diphosphate
B	DB02594	2'-Deoxycytidine
A	DB02770	7-Alpha-D-Ribofuranosyl-2-Aminopurine-5'-Phosphate
A	DB02883	2',3'-Dideoxycytidine-5'-Monophosphate
A	DB02930	Phosphothiophosphoric Acid-Adenylate Ester
B	DB03015	6-Hydroxy-1,6-Dihydro Purine Nucleoside
B	DB03338	Heptyl-Beta-D-Glucopyranoside
A	DB03666	3'-Azido-3'-Deoxythymidine-5'-Monophosphate
B	DB04440	Purine Riboside
B	DB04627	Cyclouridine
B	DB01694	D-tartaric acid
B	DB02737	Oxalate Ion
B	DB03609	3-Deoxyguanosine
B	DB03776	Lactaldehyde
B	DB04139	6-Hydroxypropylthymine
A	DB05248	5-bromo-cytidinemonophosphate
B	DB00495	Zidovudine
B	DB00811	Ribavirin
B	DB02441	2-Butyl-5,6-Dihydro-1h-Imidazo[4,5-D]Pyridazine-4,7-Dione
A	DB02716	7-Methyl-Guanosine-5'-Triphosphate
A	DB02905	Phosphoric Acid Mono-[3,4-Dihydroxy-5-(5-Hydroxy-Benzoimidazol-1-Yl)Tetrahydro-Furan-2-Ylmethyl] Ester
A	DB03491	2'-Deoxyguanosine-5'-Diphosphate
B	DB04141	2-Hexyloxy-6-Hydroxymethyl-Tetrahydro-Pyran-3,4,5-Triol
A	DB00300	Tenofovir
B	DB00649	Stavudine
B	DB02066	N7-Methyl-Formycin A
C	DB02110	Protoporphyrin Ix Containing Co
A	DB03668	1-(5'-Phospho-Beta-D-Ribofuranosyl)Barbituric Acid
B	DB00536	Guanidine
B	DB02282	5'-Deoxy-5'-Methylthioadenosine
A	DB02355	Adenosine-5'-Rp-Alpha-Thio-Triphosphate
A	DB02887	2',3'-Dehydro-2',3'-Deoxy-Thymidine 5'-Triphosphate
B	DB02896	Methylthioinosine
B	DB03271	7,8-Dihydro-L-Biopterin
A	DB03448	2'-Deoxyuridine 3'-Monophosphate
B	DB03735	9-(2-Deoxy-Beta-D-Ribofuranosyl)-6-Methylpurine
B	DB03766	Propanoic Acid
B	DB03900	2-Methyl-2-Propanol
B	DB04400	7,8-dihydrobiopterin
B	DB08231	MYRISTIC ACID
B	DB00651	Dyphylline
B	DB03904	Urea
A	DB04457	2'-Deoxyguanosine-5'-Monophosphate
B	DB00879	Emtricitabine
A	DB01073	Fludarabine
B	DB02921	(South)-Methanocarba-Thymidine
A	DB03148	Phosphomethylphosphonic Acid Adenosyl Ester
B	DB04464	N-Formylmethionine
B	DB02947	2-Fluoro-2'-Deoxyadenosine
A	DB03200	7-Alpha-D-Ribofuranosyl-Purine-5'-Phosphate
C	DB03418	Diacetyldeuteroheme
A	DB03893	Thionicotinamide-Adenine-Dinucleotide
B	DB07780	FARNESYL DIPHOSPHATE
B	DB00128	L-Aspartic Acid
A	DB03846	5-Hydroxymethyluridine-2'-Deoxy-5'-Monophosphate
B	DB03994	Ethanolamine
B	DB04361	Methylhydrazine
B	DB00122	Choline
A	DB02333	Deoxyuridine-5'-Triphosphate
A	DB02380	2'-Deoxyinosine
B	DB02500	6-(Dihydroxy-Isobutyl)-Thymine
B	DB02562	Quinonoid 7,8-Tetrahydrobiopterin
A	DB03011	Adenosine-5'-(Dithio)Phosphate
A	DB03413	Deoxyuridine-5'-Diphosphate
B	DB03493	7-Methylguanosine
B	DB03562	Tetrahydrodeoxyuridine
A	DB03593	N7-Methyl-Guanosine-5'-Monophosphate
A	DB03887	Alpha-Adenosine Monophosphate
A	DB04047	[Pterin-6-Yl Methanyl]-Phosphonophosphate
B	DB04337	Methyl Isocyanide
B	DB04546	3-Deaza-Adenosine
A	DB02654	6-Hydroxy-Flavin-Adenine Dinucleotide
B	DB03172	Tubercidin
B	DB03274	2'-5'dideoxyuridine
B	DB00121	Biotin
B	DB00130	L-Glutamine
A	DB02142	Pyridoxamine-5'-Phosphate
B	DB02153	3-Sulfinoalanine
A	DB02209	Pyridoxine-5'-Phosphate
B	DB02391	2-Amino-7-[2-(2-Hydroxy-1-Hydroxymethyl-Ethylamino)-Ethyl]-1,7-Dihydro-Purin-6-One
B	DB02926	2-Oxo-Glutaric Acid
D	DB03185	1-Beta-Ribofuranosyl-1,3-Diazepinone
A	DB03195	Phosphoric Acid Mono-[3-Fluoro-5-(5-Methyl-2,4-Dioxo-3,4-Dihydro-2h-Pyrimidin-1-Yl)-Tetrahyro-Furan-2-Ylmethyl] Ester
C	DB03224	2-Formyl-Protoporphryn Ix
B	DB03806	2-Oxyglutaric Acid
A	DB03909	Adenosine-5'-[Beta, Gamma-Methylene]Triphosphate
B	DB04441	2-Fluoroadenosine
B	DB00631	Clofarabine
A	DB02309	5--Monophosphate-9-Beta-D-Ribofuranosyl Xanthine
B	DB02476	Carboxymethylated Cysteine
B	DB02934	9-(6-Deoxy-Alpha-L-Talofuranosyl)-6-Methylpurine
B	DB03068	Zebularine
A	DB03103	Thymidine-5'- Diphosphate
A	DB03318	6-Hydro-1-Methyladenosine-5'-Monophosphate
B	DB03743	1,4-Dideoxy-4-Aza-1-(S)-(9-Deazahypoxanthin-9-Yl)-D-Ribitol
B	DB03952	9-(6-Deoxy-Beta-D-Allofuranosyl)-6-Methylpurine
A	DB04158	6-(Adenosine Tetraphosphate-Methyl)-7,8-Dihydropterin
B	DB04339	Carboxymethylenecysteine
B	DB07554	2-CHLORO-9-(2-DEOXY-2-FLUORO-B -D-ARABINOFURANOSYL)-9H-PURIN-6-AMINE
A	DB01945	4-Carbamoyl-1-Beta-D-Ribofuranosyl-Imidazolium-5-Olate-5'-Phosphate
A	DB02098	Adenosine-2'-5'-Diphosphate
B	DB02579	Acrylic Acid
B	DB02674	4-(2-Oxo-Hexahydro-Thieno[3,4-D]Imidazol-4-Yl)-Butyricacid
A	DB03532	Phosphomethylphosphonic Acid Guanylate Ester
B	DB03635	Ethanesulfonic Acid
B	DB03801	Lysine Nz-Carboxylic Acid
B	DB04161	Propionamide
B	DB04218	1-Deaza-Adenosine
B	DB04650	5-[(3AS,4R,6AR)-2-OXOHEXAHYDRO-1H-THIENO[3,4-D]IMIDAZOL-4-YL]PENTANOIC ACID
B	DB00126	Vitamin C
B	DB00127	Spermine
B	DB00709	Lamivudine
B	DB00943	Zalcitabine
B	DB02793	Isochorismic Acid
A	DB03464	Formycin-5'-Monophosphate
A	DB03969	3-Acetyl Pyridine Adenine Dinucleotide
B	DB07357	4-AMINO-2-HEXYLOXY-6-HYDROXYMETHYL-TETRAHYDRO-PYRAN-3,5-DIOL
A	DB08016	4-(6-CHLORO-2,4-DIOXO-1,2,3,4-TETRAHYDROPYRIMIDIN-5-YL) BUTYL PHOSPHATE
A	DB08651	3'-THIO-THYMIDINE-5'-PHOSPHATE
B	DB01280	Nelarabine
A	DB01753	4-Oxo-Nicotinamide-Adenine Dinucleotide Phosphate
B	DB01828	Methylamine
A	DB01965	2'-Deoxyuridine 5'-Alpha,Beta-Imido-Triphosphate
B	DB02230	Immucillin-G
A	DB02382	Namn
A	DB04602	PUROMYCIN AMINONUCLEOSIDE-5'-MONOPHOSPHATE
B	DB02174	D-Glutamine
A	DB02980	Thymidine-5'-(Dithio)Phosphate
C	DB04009	Dimethyl Propionate Ester Heme
B	DB04385	3-Deazacytidine
B	DB04444	Tetrafluoroaluminate Ion
B	DB07170	5'-FLUORO-2',5'-DIDEOXYADENOSINE
B	DB00143	Glutathione
B	DB00360	Tetrahydrobiopterin
B	DB02448	N-Tridecanoic Acid
A	DB02798	Alpha-Methylene Adenosine Monophosphate
A	DB03155	1-(2-Deoxy-2-Fluoro-3-O-Phosphono-Beta-L-Ribofuranosyl)Pyrimidine-2,4(1h,3h)-Dione
B	DB03636	Glycinamid
B	DB04162	5-Nitro-6-Ribityl-Amino-2,4(1h,3h)-Pyrimidinedione
A	DB04259	7n-Methyl-8-Hydroguanosine-5'-Monophosphate
B	DB00927	Famotidine
B	DB01769	Double Oxidized Cysteine
C	DB04384	Fe-Mesopone
B	DB07646	UNDECYLAMINE-N,N-DIMETHYL-N-OXIDE
B	DB00883	Isosorbide Dinitrate
B	DB01915	S-Hydroxycysteine
A	DB02075	(1s)-1(9-Deazahypoxanthin-9yl)1,4-Dideoxy-1,4-Imino-D-Ribitol-5-Phosphate
A	DB02236	Glycinamide Ribonucleotide
B	DB02655	D-Aspartic Acid
B	DB03398	Cysteine Sulfenic Acid
A	DB03482	8-Demethyl-8-Dimethylamino-Flavin-Adenine-Dinucleotide
A	DB03641	2'-deoxyuridine 5'-alpha,beta-imido-diphosphate
A	DB04260	9-(5,5-Difluoro-5-Phosphonopentyl)Guanine
B	DB00529	Foscarnet
B	DB01159	Halothane
A	DB02527	Cyclic Adenosine Monophosphate
A	DB02714	3'-Uridinemonophosphate
A	DB02805	1-(3-O-Phosphono-Beta-L-Arabinofuranosyl)Pyrimidine-2,4(1h,3h)-Dione
A	DB03178	Guanosine-2',3'-Cyclophosphorothioate
B	DB03986	6-Methyl-Formycin A
B	DB04359	Vinylsulphonic Acid
B	DB00900	Didanosine
A	DB02222	2,6-Diamino-(S)-9-[2-(Phosphonomethoxy)Propyl]Purine
A	DB03358	7n-Methyl-8-Hydroguanosine-5'-Triphosphate
B	DB00139	Succinic acid
B	DB00556	Perflutren
B	DB01839	1,2-Propanediol
A	DB01842	3'-Phosphate-Adenosine-5'-Diphosphate
B	DB02159	R-1,2-Propanediol
A	DB02315	Cyclic Guanosine Monophosphate
B	DB02356	4-Imidazolmethylene-5-Imidazolone Chromophore
B	DB02385	Neopterin
B	DB02475	Deoxyguanidinoproclavaminic acid
B	DB02580	1-(2-Methoxy-Ethoxy)-2-{2-[2-(2-Methoxy-Ethoxy]-Ethoxy}-Ethane
B	DB02818	Iodo-Willardiine
B	DB03216	(1'r,2's)-9-(2-Hydroxy-3'-Keto-Cyclopenten-1-Yl)Adenine
A	DB03315	Guanosine-3'-Monophosphate
A	DB03349	8-Bromo-Adenosine-5'-Monophosphate
B	DB03457	2,3-Propandiol
A	DB03664	P1-(Adenosine-5'-P5-(Uridine-5')Pentaphosphate
B	DB03670	2-(Oxalyl-Amino)-4,5,6,7-Tetrahydro-Thieno[2,3-C]Pyridine-3-Carboxylic Acid
B	DB03738	Pantothenoylaminoethenethiol
B	DB04349	S-1,2-Propanediol
A	DB04536	Guanosine-3',5'-Monophosphate
A	DB04554	8-Bromoadenosine-5'-Diphosphate
B	DB02157	Beta-Hydroxy Aspartic Acid
B	DB02575	Tetraethylene Glycol
A	DB02937	Gamma-Arsono-Beta, Gamma-Methyleneadenosine-5'-Diphosphate
B	DB03215	(2s,5s)-5-Carboxymethylproline
A	DB03227	Nicotinamide Mononucleotide
B	DB03551	4'-Deaza-1'-Aza-2'-Deoxy-1'-(9-Methylene)-Immucillin-H, (3r,4r)-N-[9-Deazahypoxanthin-9-Yl)Methyl]-4-Hydroxymethyl-Pyrrolidin-3-Ol
B	DB03640	Beta-Hydroxyaspartic Acid
A	DB04068	Fudp
B	DB04085	1-[Pyrrol-1-Yl-2,5-Dione-Methoxymethyl]-Pyrrole-2,5-Dione
B	DB04160	Diphosphate
B	DB04212	2-Iminiopropanoate
A	DB04497	2'-Monophosphoadenosine-5'-Diphosphoribose
B	DB07599	[(2-AMINO-ALPHA-METHOXYIMINO-4-THIAZOLYLACETYL)AMINO]METHYLBORONIC ACID
B	DB08558	2-HYDROXYMETHYL-6-OCTYLSULFANYL-TETRAHYDRO-PYRAN-3,4,5-TRIOL
B	DB00824	Enprofylline
A	DB01961	Cytidine-3'-Monophosphate
A	DB02150	Hydantocidin-5'-Monophosphate
B	DB02212	Pyrophosphate 2-
A	DB02493	Hydantocidin-5'-Phosphate
B	DB02692	(6r,1'r,2's)-5,6,7,8 Tetrahydrobiopterin
A	DB02783	4'-Deoxy-4'-Acetylyamino-Pyridoxal-5'-Phosphate
B	DB02899	N-Carboxymethionine
B	DB02951	3-Hydroxypyruvic Acid
A	DB03168	Nicotinamide Adenine Dinucleotide Cyclohexanone
A	DB03230	Adenosine-5'-Propylphosphate
B	DB03918	6s-5,6,7,8-Tetrahydrobiopterin
A	DB03997	Phosphoric Acid Mono-[2-Amino-3-(3h-Imidazol-4-Yl)-Propyl]Ester
A	DB04083	N'-Pyridoxyl-Lysine-5'-Monophosphate
A	DB04438	BVDU-MP
B	DB07824	4-ethyl-5-methyl-2-(1H-tetrazol-5-yl)-1,2-dihydro-3H-pyrazol-3-one
B	DB02637	Oxaloacetate Ion
B	DB02987	Cysteine-S-Acetamide
B	DB03102	2-(Oxalyl-Amino)-4,7-Dihydro-5h-Thieno[2,3-C]Pyran-3-Carboxylic Acid
B	DB03499	Malate Ion
A	DB03629	Pyridoxal-5'-Phosphate-N-Oxide
B	DB04075	N-Acetyl-L-Glutamate
B	DB07497	5-(HEXAHYDRO-2-OXO-1H-THIENO[3,4-D]IMIDAZOL-6-YL)PENTANAL
B	DB00614	Furazolidone
B	DB00909	Zonisamide
A	DB01790	Sp-Adenosine-3',5'-Cyclic-Monophosphorothioate
B	DB02203	Acetone Cyanohydrin
B	DB02392	2'3'-Dideoxyinosine
B	DB02954	(Carboxyhydroxyamino)Ethanoic Acid
A	DB03510	6-O-Phosphoryl Inosine Monophosphate
A	DB03962	Nicotinamide 8-Bromo-Adenine Dinucleotide Phosphate
A	DB04421	Nicotinamide Adenine Dinucleotide 3-Pentanone Adduct
B	DB00698	Nitrofurantoin
B	DB00898	Ethanol
D	DB01598	Imipenem
A	DB01639	N-Methyl-Pyridoxal-5'-Phosphate
B	DB01844	Dimethylformamide
B	DB01956	2-Aminoethanesulfonic Acid
B	DB02416	2-Ribofuranosyl-3-Iodo-2,3-Dihydro-1h-Pyrazolo[3,4-D]Pyrimidin-4-Ylamine
B	DB02528	Tetrazolyl Histidine
B	DB02767	3-Hydroxy-Myristic Acid
B	DB02916	[(2r,3s,4r,5r)-5-(6-Amino-9h-Purin-9-Yl)-3,4-Dihydroxytetrahydro-2-Furanyl]Methyl Sulfamate
B	DB02933	5'-Deoxy-5'-(Methylthio)-Tubercidin
B	DB02952	Alpha-Aminoisobutyric Acid
B	DB03089	L-Iso-Aspartate
B	DB03353	2-Iminobiotin
B	DB03680	Tartronate
B	DB04128	5-Nitroso-6-Ribityl-Amino-2,4(1h,3h)-Pyrimidinedione
A	DB04757	GUANOSINE-2',3'-O-METHYLIDENEPHOSPHONATE
B	DB06864	2-(3-CARBOXYPROPIONYL)-6-HYDROXY-CYCLOHEXA-2,4-DIENE CARBOXYLIC ACID
B	DB01610	Valganciclovir
B	DB02103	2-Chlorodideoxyadenosine
C	DB02920	Zn(Ii)-(20-Oxo-Protoporphyrin Ix)
B	DB02922	Hexafluoroacetone Hydrate
B	DB03240	(S)-2-Amino-3-(1,3,5,7-Pentahydro-2,4-Dioxo-Cyclopenta[E]Pyrimidin-1-Yl) Proionic Acid
B	DB03489	2-Keto-3-Deoxygluconate
B	DB03498	Mercaptomethyl Phosphonate
B	DB03539	2-(Acetylamino)-2-Deoxy-6-O-Methyl-Alpha-D-Allopyranose
B	DB03770	N-Hydroxyguanidine
A	DB03912	4'-Phosphopantetheine
A	DB04542	3'-Azido-3'-Deoxythymidine-5'-Diphosphate
B	DB07481	tert-butyl [(2-amino-4-oxo-4,7-dihydro-3H-pyrrolo[2,3-d]pyrimidin-5-yl)methyl]carbamate
A	DB08185	2-METHYLTHIO-N6-ISOPENTENYL-ADENOSINE-5'-MONOPHOSPHATE
B	DB08255	(3AR,5R,6S,7R,7AR)-5-(HYDROXYMETHYL)-2-PROPYL-5,6,7,7A-TETRAHYDRO-3AH-PYRANO[3,2-D][1,3]THIAZOLE-6,7-DIOL
A	DB00369	Cidofovir
A	DB01937	Guanosine-2'-Monophosphate
B	DB01974	2-Amino-3-[5-(Amino-Carboxy-Methyl)-2,3-Dihydro-Isoxazol-3-Ylsulfanyl]-Propionic Acid
B	DB02039	S-Acetyl-Cysteine
B	DB02072	2-(Oxalyl-Amino)-4,7-Dihydro-5h-Thieno[2,3-C]Thiopyran-3-Carboxylic Acid
B	DB02413	Hydroxyethylcysteine
B	DB03091	4-Amido-4-Carbamoyl-Butyric Acid
B	DB03142	Alpha-L-Arabinose
B	DB03246	Beta-L-Arabinose
B	DB03382	S-Oxy Cysteine
B	DB03389	Xylopyranose
A	DB03397	Uridine-Diphosphate-N-Acetylglucosamine
B	DB03423	S-Adenosyl-L-Homoselenocysteine
B	DB03794	Trifluoroalanine
B	DB03796	Palmitic Acid
A	DB03797	3-Aminomethyl-Pyridinium-Adenine-Dinucleotide
B	DB03886	Biopterin
B	DB03911	L-Xylose (Cyclic Form)
C	DB04249	Zinc Substituted Heme C
B	DB04286	Ribose(Pyranose Form)
B	DB08321	(1S,2S,3R,6R)-4-(hydroxymethyl)-6-(octylamino)cyclohex-4-ene-1,2,3-triol
B	DB00133	L-Serine
B	DB00151	L-Cysteine
B	DB00155	L-Citrulline
B	DB01034	Cerulenin
B	DB01869	Rhamnose
A	DB02196	Uridine-Diphosphate-N-Acetylgalactosamine
A	DB02682	2-Deamino-6-Deoxy-6thiophosphite-5'-Phosphate Guanosine
B	DB02688	2,3-Didehydroalanine
A	DB03146	2-Deazo-6-Thiophosphate Guanosine-5'-Monophosphate
B	DB03175	1-Proponol
B	DB03485	Alpha-D-Fucose
B	DB03578	Pyruvamide
A	DB03725	Phosphomethylphosphonic Acid-Guanylate Ester
B	DB03773	6-Deoxy-Alpha-D-Glucose
B	DB03775	D-Dethiobiotin
B	DB03965	Fucose
B	DB04000	Bromo-Willardiine
B	DB04062	Beta-D-Fucose
B	DB04319	6-Deoxyglucose
B	DB04473	Alpha-L-Fucose
B	DB00125	L-Arginine
B	DB01055	Mimosine
B	DB01735	3-Chloroalaninate
B	DB02446	Glutamine Hydroxamate
B	DB02823	Phosphonoacetic Acid
B	DB02845	Methylphosphinic Acid
B	DB02897	Acetylphosphate
B	DB03112	6-(2-Oxo-Hexahydro-Thieno[3,4-D]Imidazol-4-Yl)-Hexanoic Acid
B	DB03366	Imidazole
B	DB03589	Alpha-Ketomalonic Acid
B	DB03704	12-Hydroxydodecanoic Acid
B	DB03719	N-Ethyl-5'-Carboxamido Adenosine
B	DB03754	Tris(Hydroxymethyl)Aminomethane
C	DB03934	Protoporphyrin Ix Containing Zn
B	DB04257	Palmitoleic Acid
B	DB04313	3-Methyl-Aspartic Acid
B	DB04390	Methyl Phosphinic Acid
B	DB04530	S,S-(2-Hydroxyethyl)Thiocysteine
B	DB04538	2s,3s-3-Methylaspartic Acid
B	DB07517	3-CARBOXY-4-METHYL-5-PROPYL-2-FURANPROPIONIC
D	DB08776	N-(4-OXO-5,6,7,8-TETRAHYDRO-4H-[1,3]THIAZOLO[5,4-C]AZEPIN-2-YL)ACETAMIDE
A	DB01661	Phosphoribosyl Atp
B	DB02042	2-(2-{2-[2-(2-Methoxy-Ethoxy)-Ethoxy]-Ethoxy}-Ethoxy)-Ethanol
B	DB02119	6-Hydroxymethyl-7,8-Dihydropterin
B	DB02650	Tri-Chloro-Acetaldehyde
B	DB03283	beta-L-fucose
B	DB03843	Formaldehyde
B	DB04568	5-Aminoimidazole Ribonucleoside
B	DB04604	5-iodotubercidin
B	DB08427	PREPHENIC ACID
B	DB00174	L-Asparagine
D	DB00766	Clavulanate
B	DB01910	Adenosyl-Ornithine
B	DB01921	Xylose-Derived Lactam Oxime
B	DB02158	(1s)-1-(9-Deazaadenin-9-Yl)-1,4,5-Trideoxy-1,4-Imino-5-Methylthio-D-Ribitol
B	DB02631	5-Chloro-6-[(2-Iminopyrrolidin-1-Yl)Methyl]Pyrimidine-2,4(1h,3h)-Dione
B	DB02670	4-Deoxy-Alpha-D-Glucose
D	DB02950	Hymenialdisine
B	DB03077	3-Amino-4-{3-[2-(2-Propoxy-Ethoxy)-Ethoxy]-Propylamino}-Cyclobut-3-Ene-1,2-Dione
B	DB03881	MT-Immucillin-H
B	DB04334	6-hydroxydopa quinone
B	DB00594	Amiloride
B	DB01837	O-Acetylserine
A	DB02549	3'-O-Acetylthymidine-5'-Diphosphate
C	DB02949	2-Acetyl-Protoporphyrin Ix
A	DB02957	Orotidine-5'-Monophosphate
B	DB03048	6-Carboxymethyluracil
B	DB03066	D-Lactic Acid
B	DB03291	4-Deoxy-4-Amino-Beta-D-Glucose
A	DB03300	Pterin Cytosine Dinucleotide
B	DB03375	Hydroxyalanine
A	DB03755	Adenosine-5'-[Beta, Gamma-Methylene]Tetraphosphate
B	DB03929	D-Serine
B	DB04199	1-Monohexanoyl-2-Hydroxy-Sn-Glycero-3-Phosphate
B	DB04294	5-Phosphoribosyl-1-(Beta-Methylene) Pyrophosphate
B	DB04398	Lactic Acid
A	DB06843	2',5'-DIDEOXY-ADENOSINE 3'-MONOPHOSPHATE
B	DB07052	5'-S-ethyl-5'-thioadenosine
B	DB07980	(2E)-1-[(6-chloropyridin-3-yl)methyl]-N-nitroimidazolidin-2-imine
B	DB02389	Phosphoglycolic Acid
B	DB02726	2-Phosphoglycolic Acid
A	DB02824	N-Pyridoxyl-Glycine-5-Monophosphate
A	DB02948	Fosmidomycin
B	DB03144	N-Omega-Hydroxy-L-Arginine
B	DB03631	3-(4-Hydroxy-3-Imino-6-Oxo-Cyclohexa-1,4-Dienyl)-Alanine
B	DB03804	5-Bromothienyldeoxyuridine
B	DB04077	Glycerol
B	DB04167	N-Acetyl-L-Glutamine
B	DB04299	Maleic Acid
B	DB04433	N''-{3-[(3s,8ar)-1,4-Dioxooctahydropyrrolo[1,2-a]Pyrazin-3-Yl]Propyl}Guanidine
B	DB04594	3-hydroxyglutaric acid
B	DB04695	FARNESYL THIOPYROPHOSPHATE
B	DB02262	Orotic Acid
B	DB02275	[2-Aminomethyl-5-Oxo-4-(4-Oxo-Cyclohexa-2,5-Dienylmethyl)-4,5-Dihydro-Imidazol-1-Yl] -Acetaldehyde
B	DB02381	Nor-N-Omega-Hydroxy-L-Arginine
B	DB02414	(3s,8ar)-3-(1h-Imidazol-5-Ylmethyl)Hexahydropyrrolo[1,2-a]Pyrazine-1,4-Dione
B	DB02966	Fluoro-Willardiine
B	DB03138	Perchlorate Ion
B	DB03174	Phosphonoacetaldehyde
B	DB03394	Heptaethylene Glycol, Peg330
A	DB03765	Cytidine-2'-Monophosphate
B	DB03858	S-Acetonylcysteine
A	DB03951	16g
B	DB04129	Willardiine
B	DB04183	Methylmalonic Acid
B	DB04296	5-Oxo-L-Norleucine
B	DB04562	Tricarballylic Acid
B	DB07298	3-(CARBOXYMETHOXY)THIENO[2,3-B]PYRIDINE-2-CARBOXYLIC ACID
B	DB07681	DODECANESULFONATE ION
B	DB00160	L-Alanine
B	DB00911	Tinidazole
A	DB02498	Carba-Nicotinamide-Adenine-Dinucleotide
B	DB03835	N-(8,9,10-Trihydroxy-7-Hydroxymethyl-2,4-Dioxo-6-Oxa-1,3-Diaza-Spiro[4.5]Dec-3-Yl-Acetamide
B	DB03936	1-Deoxy-Ribofuranose-5'-Phosphate
B	DB04328	Shikimate-3-Phosphate
B	DB08259	7-{[(CYCLOHEXYLAMINO)CARBONYL]AMINO}HEPTANOIC ACID
B	DB01236	Sevoflurane
B	DB01632	Alpha-Phosphoribosylpyrophosphoric Acid
B	DB01664	(S)-Des-Me-Ampa
B	DB02201	Malonate Ion
B	DB02343	3,6,9,12,15-Pentaoxaheptadecane
B	DB02423	Thiopyrophosphate
A	DB02484	Cytidine 5'-Diphosphoglycerol
B	DB02772	Sucrose
A	DB03145	4-Methyl-5-Hydroxyethylthiazole Phosphate
B	DB03343	Malate Like Intermediate
B	DB03364	N-Carbamyl-D-Methionine
B	DB03553	Glutaric Acid
B	DB03661	Cysteinesulfonic Acid
A	DB04022	Guanosine-5',3'-Tetraphosphate
B	DB00659	Acamprosate
B	DB00791	Uracil mustard
B	DB01189	Desflurane
B	DB01692	Dithioerythritol
A	DB01695	N-Hydroxy-4-Phosphono-Butanamide
B	DB01804	2-Ammoniobut-3-Enoate, 2-Amino-3-Butenoate
B	DB01885	D-Galctopyranosyl-1-On
B	DB02002	2-Aminoprop-2-Enamide
B	DB02129	Dihydroorotic Acid
B	DB02175	Malonic acid
B	DB02184	(2s,3s)-1,4-Dimercaptobutane-2,3-Diol
B	DB02289	2-Aminopropanedioic Acid
B	DB02418	(R,R)-2,3-Butanediol
B	DB02999	Quisqualate
B	DB03278	D-Treitol
B	DB03399	Ethyl Isocyanide
C	DB03469	Heme D
B	DB03927	Glycyl-L-Alpha-Amino-Epsilon-Pimelyl-D-Alanine
B	DB03937	Erythose-4-Phosphate
B	DB03953	L-Thiocitrulline
B	DB04382	2-Deoxy-Beta-D-Galactose
B	DB04447	1,4-Dithiothreitol
B	DB04481	Meso-Erythritol
B	DB04564	Gluconolactone
B	DB07173	7-(5-DEOXY-BETA-D-RIBOFURANOSYL)-5-IODO-7H-PYRROLO[2,3-D]PYRIMIDIN-4-AMINE
B	DB07849	S-NONYL-CYSTEINE
B	DB00336	Nitrofurazone
B	DB01563	Chloral hydrate
A	DB02011	N-(Phosphonoacetyl)-L-Ornithine
B	DB02228	2-Fluoro-2-Deoxy-Beta-D-Galactopyranose
B	DB02267	Argininosuccinate
B	DB02321	5-(3-Amino-4,4-Dihyroxy-Butylsulfanylmethyl)-Tetrahydro-Furan-2,3,4-Triol
A	DB03041	Udp-Glucuronic Acid
B	DB03304	7-Deaza-7-Aminomethyl-Guanine
B	DB03354	2-(Beta-D-Glucopyranosyl)-5-Methyl-1,3,4-Oxadiazole
B	DB03772	2-Hexyloxy-6-Hydroxymethyl-Tetrahydro-Pyran-3,5-Diol
B	DB04084	2-Deoxy-2-Fluoro-Alpha-D-Mannose
B	DB04189	N2-(Carboxyethyl)-L-Arginine
B	DB04282	2-Deoxy-2fluoro-Glucose
B	DB04332	2-{2-[2-2-(Methoxy-Ethoxy)-Ethoxy]-Ethoxy}-Ethanol
B	DB04483	2-Deoxy-2-Fluoro-Beta-D-Mannose
B	DB04527	Beta-Hydroxyasparagine
A	DB04754	GUANOSINE-2',3'-O-ETHYLIDENEPHOSPHONATE
B	DB08283	(2R,3R,4R,5S)-2-(HYDROXYMETHYL)-1-NONYLPIPERIDINE-3,4,5-TRIOL
B	DB00162	Vitamin A
B	DB00855	Aminolevulinic acid
B	DB01677	Fumarate
B	DB01786	D-Alanine
A	DB01993	N-(5'-Phosphopyridoxyl)-D-Alanine
A	DB02038	D-Pyridoxyl-N,O-Cycloserylamide-5-Monophosphate
B	DB02108	2-Aminoethanimidic Acid
B	DB02499	Dinor-N(Omega)-Hydroxy-L-Arginine
B	DB02564	Spermine (Fully Protonated Form)
B	DB02695	O1-Pentyl-Mannose
B	DB02778	2,5-Anhydroglucitol-1,6-Biphosphate
D	DB02816	7-(1-Methyl-1,2,3-Triazol-4-Yl)-6-Formyl-2,7-Dihydro-[1,4]Thiazepine-3-Carboxylic Acid, Brl42715, C6-(N1-Methyl-1,2,3-Triazolylmethylene)Penem
B	DB02825	Methylphosphonic Acid Ester Group
A	DB03186	U-Pi-a-Pi
B	DB03445	Tazobactam Trans-Enamine Intermediate
A	DB03579	Pyridoxyl-N,O-Cycloserylamide-5-Monophosphate
A	DB03787	L-Pyridoxyl-N,O-Cycloserylamide-5-Monophosphate
B	DB03822	Ethyl Dihydrogen Phosphate
B	DB03834	Tazobactam Intermediate
B	DB03943	D-Asparagine
A	DB04362	Adenosine Diphosphate 5-(Beta-Ethyl)-4-Methyl-Thiazole-2-Carboxylic Acid
A	DB04467	Pyridoxyl-Alanine-5-Phosphate
B	DB04548	4-Deoxy-D-Glucuronic Acid
B	DB04684	BIS(HEXAMETHYLENE)TRIAMINE
B	DB04734	Citraconic acid
A	DB04753	9-DEAZAINOSINE-2',3'-O-ETHYLIDENEPHOSPHONATE
B	DB07551	2-CHLORO-4-ETHYLAMINO-6-(S(-)-2'-CYANO-4-BUTYLAMINO)-1,3,5-TRIAZINE
B	DB07552	2-CHLORO-4-ETHYLAMINO-6-(R(+)-2'-CYANO-4-BUTYLAMINO)-1,3,5-TRIAZINE
B	DB08324	N-3-OXO-DODECANOYL-L-HOMOSERINE LACTONE
C	DB00115	Cyanocobalamin
B	DB00853	Temozolomide
B	DB00863	Ranitidine
B	DB01898	2s,3r-2-Amino-3-Methylpentanedioic Acid
B	DB02094	N-2-Thiophen-2-Yl-Acetamide Boronic Acid
B	DB02227	4,5-Dihydroxy-Tetrahydro-Pyran-2-Carboxylic Acid
B	DB02807	D-2-Keto-3-Deoxygalactonate
A	DB02927	Mixed Carbamic Phosphoric Acid Anhydride of 7,8-Diaminononanic Acid
B	DB03134	2-Aminopimelic Acid
B	DB03163	(2-[2-Ketopropylthio]Ethanesulfonate
B	DB03188	4-Thio-Beta-D-Glucopyranose
B	DB03303	D-2-Keto-3-Deoxygluconate
B	DB03387	N-Hydroxy-N-Isopropyloxamic Acid
B	DB03584	4-Deoxy-4-Thio-Beta-D-Glucopyranose
B	DB03599	4-Thio-D-Glucose
B	DB03810	(3r)-3-Methyl-L-Glutamic Acid
B	DB03816	Difluoromethionine
B	DB04021	MF268
B	DB04173	Fructose
B	DB04450	Heptyl 1-Thiohexopyranoside
D	DB06904	(5S,6S)-6-[(R)ACETOXYETH-2-YL]-PENEM-3-CARBOXYLATEPROPANE
B	DB08081	3-OXO-OCTANOIC ACID (2-OXO-TETRAHYDRO-FURAN-3-YL)-AMIDE
B	DB08605	6-METHYL-2(PROPANE-1-SULFONYL)-2H-THIENO[3,2-D][1,2,3]DIAZABORININ-1-OL
B	DB08690	UBIQUINONE-2
A	DB01143	Amifostine
B	DB01819	Phosphoenolpyruvate
B	DB02186	N-Acetyl-D-Galactosamine 6-Sulfate
B	DB02404	1-Deoxy-1-Thio-Heptaethylene Glycol
B	DB02761	S-Mercaptocysteine
B	DB02898	5-{[(2-Amino-9h-Purin-6-Yl)Oxy]Methyl}-2-Pyrrolidinone
B	DB03309	N-Cyclohexyltaurine
D	DB03550	Isopenicillin N
B	DB03720	Z-Dehydrobutyrine
B	DB04039	3-Oxo-Pentadecanoic Acid
B	DB04233	(Hydroxyethyloxy)Tri(Ethyloxy)Octane
B	DB04323	2-Amino-3-(Cystein-S-Yl)-Isoxazolidin-5-Yl-Acetic Acid
A	DB07782	4-AMINO-2-TRIFLUOROMETHYL-5-HYDROXYMETHYLPYRIMIDINE PYROPHOSPHATE
B	DB07823	(2S)-2-[(3aR,4R,7S,7aS)-1,3-dioxooctahydro-2H-4,7-methanoisoindol-2-yl]propanoic acid
B	DB00501	Cimetidine
B	DB00806	Pentoxifylline
B	DB01101	Capecitabine
B	DB02278	7,8-Dihydro-7,7-Dimethyl-6-Hydroxypterin
B	DB02348	Fluoro-Phosphite Ion
B	DB02437	(5r)-5-Amino-6-Hydroxyhexylcarbamic Acid
B	DB02672	Chloroacetone
B	DB02847	(2s,3r)-1-Amino-2-Methylbutane-2,3-Diol
A	DB03070	Selenazole-4-Carboxyamide-Adenine Dinucleotide
B	DB03381	Hexadecanal
B	DB03432	Beta-Amino Isobutyrate
B	DB03709	Bicine
B	DB04027	D-Arginine
B	DB04035	Pinacol[[2-Amino-Alpha-(1-Carboxy-1-Methylethoxyimino)-4-Thiazoleacetyl]Amino]Methaneboronate
B	DB04193	L-Homoserine
A	DB04230	Nitromethyldethia Coenzyme A
B	DB07850	(1R,2S)-2-(5-thioxo-4,5-dihydro-1H-1,2,4-triazol-3-yl)cyclohexanecarboxylic acid
B	DB00141	N-Acetyl-D-glucosamine
B	DB00819	Acetazolamide
B	DB01414	Cefacetrile
A	DB01774	Adenosine-5'-Monophosphate Glucopyranosyl-Monophosphate Ester
B	DB01775	Dihydroxyacetone
B	DB02808	Trifluorofurnesyl Diphosphate
B	DB02813	2-Acetamido-2-Deoxy-D-Glucono-1,5-Lactone
B	DB03017	Lauric Acid
B	DB03284	2,6-Anhydro-3-Deoxy-D-Erythro-Hex-2-Enonic Acid
B	DB03915	2-Amino-3-Ketobutyric Acid
B	DB03981	1,4-Dideoxy-5-Dehydro-O2-Sulfo-Glucuronic Acid
B	DB04024	N'-L-Seryl-3'-Amino-(3'-Deoxy)-Adenosine
B	DB04326	1,3-Dihydroxyacetonephosphate
B	DB04699	4-Butyrolactone
B	DB06881	(1Z)-2-HYDROXY-3-OXOHEX-1-EN-1-YL DIHYDROGEN PHOSPHATE
B	DB08160	(2S)-2-AMINO-4-(METHYLSULFANYL)-1-(1,3-THIAZOL-2-YL)BUTANE-1,1-DIOL
B	DB00428	Streptozocin
A	DB01895	Aspartyl-Adenosine-5'-Monophosphate
B	DB02007	Alpha-D-Glucose-6-Phosphate
B	DB02162	5'-O-(N-Ethyl-Sulfamoyl)Adenosine
B	DB02235	Methionine Sulfoxide
B	DB02312	Beta-Galactose-6-Phosphate
B	DB02318	2-Deoxy-2-Fluoro-Alpha-D-Mannosyl Fluoride
B	DB02340	N-Acetyl-Serine
A	DB02349	Nicotinamide-Adenine-Dinucleotide-5-Hydroxy-4-Oxonorvaline
B	DB02467	S-Oxymethionine
B	DB02474	Bmsc-0013
A	DB02554	Sulfoquinovose-Uridine-C1,5'-Diphosphate
B	DB02604	2-Deoxy-Glucose-6-Phosphate
A	DB02657	Glucosamine 6-Phosphate
B	DB02821	Canaline
B	DB02828	5-Fluorolevulinic Acid
B	DB02900	Alpha-D-Mannose-6-Phosphate
B	DB03201	D-Cysteine
B	DB03663	1-[(2-Amino-6,9-Dihydro-1h-Purin-6-Yl)Oxy]-3-Methyl-2-Butanol
B	DB03717	3-Hydroxy-4-(3,4,5-Trihydroxy-Tetrahydro-Pyran-2-Yloxy)-Piperidin-2-One
B	DB03746	3-Amino-4,5-Dihydroxy-Cyclohex-1-Enecarboxylate
B	DB04122	Beta-D-Glucose-6-Phosphate
B	DB04252	N-Carbamoyl-L-Aspartate
B	DB04443	Free Cysteine
B	DB04687	DIMETHYL THIOPHOSPHATE
B	DB01020	Isosorbide Mononitrate
A	DB01975	AMPCPR
B	DB02214	6,7-Dioxo-5h-8-Ribitylaminolumazine
A	DB02738	Adenosine-5'-Pentaphosphate
B	DB02779	Dodecane-Trimethylamine
B	DB02788	S,3-Hydroxybutan-2-One
A	DB02836	Guanosine 5'-Diphosphate 2':3'-Cyclic Monophosphate
B	DB03129	[3-(1,3,2-Dioxaborolan-2-Yloxy)Propyl]Guanidine
A	DB03161	Thymidine-5'-Diphospho-Beta-D-Xylose
B	DB03209	Oxonic Acid
B	DB03218	N-Acetyl-N'-Beta-D-Glucopyranosyl Urea
B	DB03320	3-Amino-Alanine
C	DB03906	2-Phenylheme
B	DB03974	L-Homoarginine
A	DB04023	Guanosine 5'-(Trihydrogen Diphosphate), P'-D-Mannopyranosyl Ester
B	DB04127	Beta-D-Arabinofuranose-5'-Phosphate
B	DB04352	[(2r,3s,4s,5r)-3,4,5-Trihydroxytetrahydrofuran-2-Yl]Methyl Dihydrogen Phosphate
B	DB04364	R,3-Hydroxybutan-2-One
B	DB08712	11-[(MERCAPTOCARBONYL)OXY]UNDECANOIC ACID
B	DB01005	Hydroxyurea
B	DB01296	Glucosamine
A	DB01649	7-Methyl-Gpppa
B	DB02215	Furoyl-Leucine
B	DB02469	4,6-Dideoxy-4-Amino-Beta-D-Glucopyranoside
B	DB02536	(2r)-2,3-Dihydroxypropanal
B	DB02571	2-Amino-6-Oxo-Hexanoic Acid
A	DB02609	4-Hydroxy-L-Threonine-5-Monophosphate
B	DB02734	4-Deoxy-D-Mannuronic Acid
B	DB02757	Pyrazole
B	DB03064	3-Decyl-2,5-Dioxo-4-Hydroxy-3-Pyrroline
B	DB03191	3-Oxiran-2ylalanine
B	DB03197	6-Hydroxymethylpterin
B	DB03212	4-Deoxyglucarate
B	DB03305	N5-Iminoethyl-L-Ornithine
B	DB03434	3[N-Morpholino]Propane Sulfonic Acid
B	DB03439	4,6-Dideoxy-4-Amino-Alpha-D-Glucose
A	DB03645	Phosphonoacetohydroxamic Acid
A	DB03649	[{(5-Chloro-2-Pyridinyl)Amino} Methylene]-1,1-Bisphosphonate
A	DB03751	2'deoxy-Thymidine-5'-Diphospho-Alpha-D-Glucose
B	DB03862	Tetrahydrooxazine
B	DB03920	N-Methyl-Alpha-Beta-Dehydroalanine
B	DB03947	D-Xylulose
B	DB04377	3-Hydroxy-3-Methyl-Glutaric Acid
A	DB04389	Ado-P-Ch2-P-Ps-Ado
B	DB04493	Fructose-6-Phosphate
B	DB04511	N-Succinyl Methionine
B	DB07060	3-(INDOL-3-YL) LACTATE
B	DB07160	N-{[(2S,3S)-3-(ETHOXYCARBONYL)OXIRAN-2-YL]CARBONYL}-L-ISOLEUCINE
B	DB07591	N1-CYCLOPENTYL-N2-(THIAZOL-2-YL)OXALAMIDE
B	DB08809	Dichloroacetic Acid
B	DB00236	Pipobroman
B	DB00566	Succimer
C	DB02173	Co(Iii)-(Deuteroporphyrin Ix)
A	DB02369	3-Aza-2,3-Dihydrogeranyl Diphosphate
B	DB02393	D-Gluco-2,5-Anhydro-1-Deoxy-1-Phosphonohexitol-6-Phosphate
B	DB02442	Dioxyselenocysteine
B	DB02490	(Diaminomethyl-Methyl-Amino)-Acetic Acid
A	DB02739	O-Phosphoglycolohydroxamate
A	DB03026	Phosphoglycolohydroxamic Acid
B	DB03088	Pyroglutamic Acid
B	DB03106	Myo-Inositol
B	DB03371	Modified Ribosylated Glutamyl Ester
B	DB03427	Delta-(L-Alpha-Aminoadipoyl)-L-Cysteinyl-D-Vinylglycine
B	DB04404	Allosamizoline
C	DB04423	Coproporphyrin I Containing Co(Iii)
B	DB04539	Glyphosate
B	DB07344	3,6,9,12,15-PENTAOXAHEPTADECAN-1-OL
B	DB07499	N-(4-{[amino(imino)methyl]amino}butyl)-2,4'-bi-1,3-thiazole-4-carboxamide
B	DB07960	5-ACETAMIDO-5,6-DIHYDRO-4-HYDROXY-6-ISOBUTOXY-4H-PYRAN-2-CARBOXYLIC ACID
B	DB08249	3,6,9,12,15-PENTAOXATRICOSAN-1-OL
B	DB08367	(R)-2-(FORMYLOXY)-3-(PHOSPHONOOXY)PROPYL PENTANOATE
B	DB08578	4-[(5-bromopyridin-2-yl)amino]-4-oxobutanoic acid
C	DB00200	Hydroxocobalamin
B	DB01821	L-N(Omega)-Nitroarginine-2,4-L-Diaminobutyric Amide
A	DB01857	Phosphoaspartate
B	DB01968	2-Thioethenamine
B	DB02523	5'-[[2-(Aminooxy)Ethyl]Methylsulfonio]-5'-Deoxy-Adenosine
B	DB02531	Isobutyric Acid
B	DB02552	Geranyl Diphosphate
B	DB03092	5-Hydroxymethyl-Chonduritol
B	DB03332	5,6-Cyclic-Tetrahydropteridine
B	DB03390	N-Propyl-Tartramic Acid
A	DB03713	Phosphorylated Aspartate
B	DB04151	4-Methyl-Histidine
A	DB04247	Aspartyl Phosphate
B	DB04305	2-Methyl-Propionic Acid
A	DB04418	Adenylosuccinic Acid
B	DB04551	Fructose-1,6-Diphosphate
B	DB04694	2,6-anhydro-3-deoxy-3-fluoronononic acid
B	DB04701	S-METHYL-GLUTATHIONE
B	DB07636	5-HEPTYL-6-HYDROXY-1,3-BENZOTHIAZOLE-4,7-DIONE
B	DB00413	Pramipexole
B	DB00703	Methazolamide
A	DB00710	Ibandronate
B	DB01423	Stepronin
D	DB01606	Tazobactam
A	DB01713	Udp-Alpha-D-Xylopyranose
B	DB01756	D-4-Phosphoerythronic Acid
A	DB01792	Adenylyl-3'-5'-Phospho-Uridine-3'-Monophosphate
B	DB01833	L-2-Amino-4-(Guanidinooxy)Butyric Acid
A	DB01868	Glycyl-L-a-Aminopimelyl-E-(D-2-Aminoethyl)Phosphonate
B	DB02027	N-{(4s)-4-Amino-5-[(2-Aminoethyl)Amino]Pentyl}-N'-Nitroguanidine
B	DB02077	L-N(Omega)-Nitroarginine-(4r)-Amino-L-Proline Amide
B	DB02109	Hadacidin
B	DB02120	6-Amino-4-Hydroxymethyl-Cyclohex-4-Ene-1,2,3-Triol
B	DB02337	S-(D-Carboxybutyl)-L-Homocysteine
B	DB02678	2-Deoxy-2-Aminogalactose
B	DB02853	D-Proline
B	DB02892	L-2-Amino-6-Methylene-Pimelic Acid
B	DB02904	Beta-3-Serine
A	DB03079	Alpha-Ribazole-5'-Phosphate Derivative
A	DB03097	Pmp-Hydroxyisoxazole, Pyridoxamine-5-Phosphate-Hydroxyisoxazole
B	DB03108	4-Phospho-D-Erythronate
A	DB03484	L-Alpha-Glycerophosphorylethanolamine
A	DB03687	4-Diphosphocytidyl-2-C-Methyl-D-Erythritol
A	DB03723	2'-Deoxy-Thymidine-Beta-L-Rhamnose
B	DB04087	Open Form of 2'-Deoxy-Ribofuranose-5'-Phosphate
D	DB04152	2-Amino-3-(3-Hydroxy-7,8-Dihydro-6h-Cyclohepta[D]-4-Isoxazolyl)Propionic Acid
B	DB04510	3-Phosphoglyceric Acid
B	DB04680	GALACTOSE GREASE
B	DB07928	N-(2-OXOTETRAHYDROFURAN-3-YL)OCTANAMIDE
B	DB08805	Metiamide
A	DB00144	Phosphatidylserine
B	DB00380	Dexrazoxane
B	DB01724	Reduced Threonine
B	DB01778	8-Amino-1,3-Dimethyl-3,7-Dihydropurine-2,6-Dione
A	DB01893	N6-Benzyl Adenosine-5'-Diphosphate
B	DB02111	3-Hydroxyisoxazole-4-Carboxylic Acid
A	DB02319	5,6-Dihydroxy-Nadp
B	DB02835	Alpha-D-Glucose 1,6-Bisphosphate
B	DB02894	Sulfamic Acid 2,3-O-(1-Methylethylidene)-4,5-O-Sulfonyl-Beta-Fructopyranose Ester
B	DB02940	(4s)-2-[(1e)-1-Aminoprop-1-Enyl]-4,5-Dihydro-1,3-Thiazole-4-Carboxylic Acid
A	DB02976	Uridine-5'-Monophosphate 2-Deoxy-2-Fluoro-Galactopyranosyl-Monophosphate Ester
B	DB03024	2-Methyl-3-(2-Aminothiazolo)Propanal
B	DB03244	(S)-2-[4-(Aminomethyl)-1h-1,2,3-Triazol-1-Yl]-4-Methylpentanoic Acid
A	DB03488	Uridine-5'-Diphosphate-2-Deoxy-2-Fluoro-Alpha-D-Galactose
B	DB03522	Aspartic Acid-4-Carboxymethyl Ester
B	DB03734	Xylarohydroxamate
B	DB03859	1-Thio-Beta-D-Glucopyranose
B	DB03942	Carboxylic PRPP
B	DB04223	Nitroarginine
B	DB04347	3-Dehydroshikimate
B	DB04535	Octaethylene glycol
B	DB06775	Carglumic acid
B	DB08222	METHOXYUNDECYLPHOSPHINIC ACID
B	DB00165	Pyridoxine
B	DB00226	Guanadrel Sulfate
B	DB00228	Enflurane
B	DB00585	Nizatidine
B	DB00742	Mannitol
B	DB01028	Methoxyflurane
A	DB01652	4-Hydroxybenzoyl Coenzyme A
B	DB01759	5-Hydroxy-2-(Hydroxymethyl)-4h-Pyran-4-One
B	DB01796	Quinolinic Acid
B	DB01971	(2e)-3-(1h-Imidazol-4-Yl)Acrylic Acid
B	DB02233	6-Hydroxy-D-Norleucine
A	DB02461	S-Methyl Phosphocysteine
C	DB02468	12-Phenylheme
B	DB02496	1-Deoxy-D-Xylulose-5-Phosphate
B	DB02590	Abequose
B	DB02606	2-Butanol
B	DB02645	3,4-Epoxybutyl-Alpha-D-Glucopyranoside
B	DB03043	(S)-2-Amino-3-(6h-Selenolo[2,3-B]-Pyrrol-4-Yl)-Propionic Acid
B	DB03099	5-Amino 6-Nitro Uracil
B	DB03101	Ribose-1-Phosphate
B	DB03412	6-Hydroxy-L-Norleucine
B	DB03556	2-(2-{2-[2-(2-{2-[2-(2-Ethoxy-Ethoxy)-Ethoxy]-Ethoxy}-Ethoxy)-Ethoxy]-Ethoxy}-Ethoxy)-Ethanol, Polyethyleneglycol Peg400
B	DB03611	L-2-Amino-4-Methoxy-Cis-but-3-Enoic Acid
B	DB03870	Ara-Alpha(1,3)-Xyl
B	DB03938	Deacetoxycephalosporin-C
B	DB03959	N,O6-Disulfo-Glucosamine
C	DB03970	(6,7-Dihydro-5h-Cyclopenta[D]Imidazo[2,1-B]Thiazol-2-Yl]-4,7-Dihydro[1,4]Thiazepine-3,6-Dicarboxylic Acid
B	DB03976	Phosphorylisopropane
B	DB04028	Tyvelose
B	DB04048	N-Carbamoyl-Alanine
B	DB04207	N-(5-Amino-5-Carboxypentyl)Glutamic Acid
B	DB04380	Diureido-Acetate
B	DB04478	Cp-166572, 2-Hydroxymethyl-4-(4-N,N-Dimethylaminosulfonyl-1-Piperazino)-Pyrimidine
B	DB04622	N-ACETYLHISTAMINE
B	DB07930	(3R)-3-HYDROXYDODECANOIC ACID
B	DB08612	1,1,1-TRIFLUORO-3-(OCTYLTHIO)ACETONE
B	DB00117	L-Histidine
B	DB01882	(2s)-2-Amino-4-(Methylsulfanyl)-1-Pyridin-2-Ylbutane-1,1-Diol
B	DB02057	AMPA
B	DB02122	4-iodo-acetamido phenylboronic acid
B	DB02172	2,5-Dideoxy-2,5-Imino-D-Glucitol
B	DB02396	Methylethylamine
B	DB02444	Icrf-187
A	DB02482	Phosphonothreonine
B	DB03003	Glutathione Sulfonic Acid
B	DB03057	Malonaldehyde
B	DB03379	2-Carboxyethylphosphonic Acid
C	DB03404	6,7-Dicarboxyl-1,2,3,4,5,8-Hexamethylhemin
A	DB03531	Flavin-Adenine Dinucleotide-N5-Isobutyl Ketone
B	DB03790	S-Dioxymethionine
A	DB04143	Indole-3-Glycerol Phosphate
B	DB04225	N-Methyldehydrobutyrine
B	DB04267	Dipicolinic Acid
A	DB04406	3-(Phosphonomethyl)Pyridine-2-Carboxylic Acid
B	DB04553	2-Oxobutanoic Acid
B	DB04585	DEHYDRO-2(S)-AMINO-6-BORONOHEXANOIC ACID
B	DB04633	N-ethyl-N-[3-(propylamino)propyl]propane-1,3-diamine
B	DB04786	Suramin
B	DB08098	{[5-(5-NITRO-2-FURYL)-1,3,4-OXADIAZOL-2-YL]THIO}ACETIC ACID
B	DB08620	{(2Z)-3-[(6-chloropyridin-3-yl)methyl]-1,3-thiazolidin-2-ylidene}cyanamide
B	DB01169	Arsenic trioxide
A	DB01690	Bis(Adenosine)-5'-Triphosphate
B	DB01894	5-N-Acetyl-Alpha-D-Neuraminic Acid
B	DB02156	Sulfopyruvate
B	DB02190	2-Oxalosuccinic Acid
B	DB02344	O-Sialic Acid (Chair Conformation)
B	DB02345	Selenocysteine
B	DB02401	4-Hydroxy-1,2,5-Oxadiazole-3-Carboxylic Acid
B	DB02447	3,8,9,10-Tetrahydroxy-7-Hydroxymethyl-6-Oxa-1,3-Diaza-Spiro[4.5]Decane-2,4-Dione
B	DB02576	F-Loop of Vitamin B12
B	DB03206	1-Deoxynojirimycin
B	DB03214	Vinylglycine
A	DB03249	2'-O-Methyl-3'-Methyl-3'-Deoxy-Arabinofuranosyl-Thymine-5'-Phosphate
B	DB03275	2-Amino-3-Mercapto-Propionamide
B	DB03586	5(R)-5-Fluoro-Beta-D-Xylopyranosyl-Enzyme Intermediate
B	DB03721	O-Sialic Acid
B	DB03955	1,5-Dideoxy-1,5-Imino-D-Mannitol
A	DB04097	Uridine-5'-Diphosphate-4-Deoxy-4-Fluoro-Alpha-D-Galactose
B	DB04265	Beta-Sialic Acid
A	DB04522	Phosphonoserine
B	DB04545	(3r,4r,5r)-5-(Hydroxymethyl)Piperidine-3,4-Diol
B	DB06867	3,6,9,12,15,18-HEXAOXAICOSANE
B	DB07367	(3Z,5S,6R,7S,8S,8aR)-3-(octylimino)hexahydro[1,3]oxazolo[3,4-a]pyridine-5,6,7,8-tetrol
B	DB07873	(1-HYDROXYDODECANE-1,1-DIYL)BIS(PHOSPHONIC ACID)
B	DB08090	(3Z,5S,6R,7S,8R,8aR)-3-(octylimino)hexahydro[1,3]oxazolo[3,4-a]pyridine-5,6,7,8-tetrol
B	DB08171	11-MERCAPTOUNDECANOIC ACID
B	DB00166	Lipoic Acid
B	DB00172	L-Proline
B	DB00753	Isoflurane
B	DB00916	Metronidazole
B	DB01646	N-Acetylmethionine
B	DB01651	Methyl 4,6-O-[(1r)-1-Carboxyethylidene]-Beta-D-Galactopyranoside
B	DB01847	N-Carbamyl-D-Valine
A	DB01861	Glucose-Uridine-C1,5'-Diphosphate
B	DB01983	2(S)-Amino-6-Boronohexanoic Acid
B	DB02397	O-(2-Acetamido-2-Deoxy-Alpha-D-Galactopyranosyl)-L-Serine
A	DB02421	Uridine-5'-Diphosphate-Mannose
B	DB02494	Alpha-Hydroxy-Beta-Phenyl-Propionic Acid
B	DB02533	Aminoguanidine
B	DB02768	Tert-Butyloxycarbonyl Group
B	DB02810	N-(2-Acetamido)Iminodiacetic Acid
B	DB02867	D-Mannose 1-Phosphate
B	DB02971	2-Amino-4-(2-Amino-Ethoxy)-Butyric Acid
B	DB03051	Tetrahydrofuran-2-Carboxylic Acid
B	DB03113	3-Fluoro-2-(Phosphonooxy)Propanoic Acid
B	DB03194	Beta-L-Methyl-Fucose
B	DB03458	N(4)-adenosyl-N(4)-methyl-2,4-diaminobutanoic acid
B	DB03473	N5-Methylglutamine
A	DB03501	Uridine Diphosphate Galactose
B	DB03513	(S)-2-Amino-3-(4h-Selenolo[3,2-B]-Pyrrol-6-Yl)-Propionic Acid
B	DB03582	N~2~-Succinylornithine
A	DB03613	4-Hydroxyphenacyl Coenzyme A
B	DB03847	Gamma-Carboxy-Glutamic Acid
B	DB03879	Alpha-L-Methyl-Fucose
B	DB04091	Alpha-L-1-Methyl-Fucose
A	DB04355	Uridine-5'-Monophosphate Glucopyranosyl-Monophosphateester
B	DB04422	2-Amino-4-Mercapto-Butyric Acid
B	DB04454	Alpha-Aminobutyric Acid
B	DB04663	2-KETO-6-PHOSPHATE-D-GLUCONIC ACID, ALPHA-FURANOSE FORM
B	DB06151	Acetylcysteine
B	DB07442	2-amino-7-(pyridin-3-ylmethyl)-3,5-dihydro-4H-pyrrolo[3,2-d]pyrimidin-4-one
B	DB07733	1-METHYL-3-TRIFLUOROMETHYL-1H-THIENO[2,3-C]PYRAZOLE-5-CARBOXYLIC ACID (2-MERCAPTO-ETHYL)-AMIDE
B	DB08323	3-OXO-N-[(3S)-2-OXOPYRROLIDIN-3-YL]DODECANAMIDE
B	DB08768	N-(3-METHYLBUT-2-EN-1-YL)-9H-PURIN-6-AMINE
B	DB00581	Lactulose
B	DB01709	2-Phosphoglyceric Acid
B	DB01714	N-Methyl-Lysine
B	DB01815	Nz-(Dicarboxymethyl)Lysine
B	DB01914	D-Glucose in Linear Form
B	DB02037	2,4-Diamino-4,6-Dihydroxypyrimidine
B	DB02079	(Aminooxy)Acetic Acid
B	DB02263	Glyceraldehyde-3-Phosphate
B	DB02368	N-Acetyl-L-Citrulline
B	DB02982	Bombykol
B	DB03004	1-[(1s)-Carboxy-2-(Methylsulfinyl)Ethyl]-(3r)-[(5s)-5-Amino-5-Carboxypentanamido]-(4r)-Sulfanylazetidin-2-One
B	DB03040	Nitrilotriacetic Acid
B	DB03419	Uracil
B	DB03465	2-Phospho-D-Glyceric Acid
B	DB03700	D-Threonine
B	DB03817	2,4-Diaminobutyric Acid
B	DB03826	5,6-Diaminouracil
A	DB04036	Coenzyme a Persulfide
B	DB04206	Nz2-Tryptophan
B	DB04304	Gluconic Acid
B	DB04383	L-Valinol
B	DB06889	3-(1H-tetrazol-5-ylmethyl)-5,6,7,8-tetrahydro[1]benzothieno[2,3-d]pyrimidin-4(3H)-one
B	DB07645	SEBACIC ACID
B	DB08661	1-(2,5-dideoxy-5-pyrrolidin-1-yl-beta-L-erythro-pentofuranosyl)-5-methylpyrimidine-2,4(1H,3H)-dione
B	DB00720	Clodronate
B	DB00851	Dacarbazine
B	DB01008	Busulfan
B	DB01638	D-Sorbitol
B	DB01727	Isocitric Acid
B	DB02264	O2-Sulfo-Glucuronic Acid
B	DB02405	12-Bromododecanoic Acid
B	DB02700	3-Deoxy-D-Glucosamine
B	DB02801	2,3 -Anhydro-Quinic Acid
B	DB02843	Alpha-D-Glucose-1-Phosphate
B	DB02985	8-Iodo-Guanine
A	DB03069	Cytidine-5'-Diphospho-Beta-D-Xylose
A	DB03171	Indole-3-Propanol Phosphate
B	DB03533	Glycoluril
A	DB03576	N-Pyridoxyl-Threonine-5-Monophosphate
B	DB03590	2,6-Diaminopimelic Acid
B	DB03799	Trifluoromethionine
B	DB03813	2-Decenoyl N-Acetyl Cysteamine
B	DB03833	2-Prolyl-5-Tert-Butyl-[1,3,4]Oxadiazole
B	DB03884	3-Phenylpyruvic Acid
A	DB03958	Mrna Cap Analog N7-Methyl Gpppg
B	DB04795	Thenoyltrifluoroacetone
B	DB07482	(2R)-N-[(2R)-2-(DIHYDROXYBORYL)-1-L-PROLYLPYRROLIDIN-2-YL]-N-[(5R)-5-(DIHYDROXYBORYL)-1-L-PROLYLPYRROLIDIN-2-YL]-L-PROLINAMIDE
B	DB07865	3-(1H-tetrazol-5-ylamino)cyclohex-2-en-1-one
B	DB07912	2-OXOHEPTYLPHOSPHONIC ACID
B	DB00129	L-Ornithine
B	DB00148	Creatine
B	DB00515	Cisplatin
B	DB01085	Pilocarpine
B	DB01206	Lomustine
B	DB01412	Theobromine
A	DB01829	Desulfo-Coenzyme A
B	DB01843	3-Amino-8,9,10-Trihydroxy-7-Hydroxymethyl-6-Oxa-1,3-Diaza-Spiro[4.5]Decane-2,4-Dione
A	DB01987	Thiamin Diphosphate
B	DB02219	3-Cyclohexyl-1-Propylsulfonic Acid
B	DB02434	4-(2-Thienyl)Butyric Acid
B	DB02501	N~2~-Succinylarginine
A	DB02547	Guanosine-5'-Diphosphate-Rhamnose
B	DB03105	5-Hydroxy Norvaline
A	DB03459	N-(Phosphonacetyl)-L-Aspartic Acid
A	DB03478	2'-O-Acetyl Adenosine-5-Diphosphoribose
B	DB03897	Hydroxyphenyl Propionic Acid
B	DB03935	1,4-Dideoxy-O2-Sulfo-Glucuronic Acid
A	DB04176	Phosporic Acid Mono-[3,4-Dihydroxy-5-(5-Methoxy-Benzoimidazol-1-Yl)-Tetrahydro-Furan-2-Ylmethyl] Ester
A	DB04201	Histidyl-Adenosine Monophosphate
B	DB04217	L-2-amino-3-butynoic acid
B	DB04351	Aconitate Ion
B	DB04742	NITROCEFIN
A	DB04762	N-PYRIDOXYL-D-GLUTAMIC ACID-5'-MONOPHOSPHATE
B	DB07904	2-HYDROXYCARBAMOYL-4-METHYL-PENTANOIC ACID
B	DB07954	3-ISOBUTYL-1-METHYLXANTHINE
D	DB08260	(1S,2R,3S,4R,5R)-2,3,4-trihydroxy-N-octyl-6-oxa-8-azabicyclo[3.2.1]octane-8-carbothioamide
B	DB08554	N-(3-CARBOXYPROPANOYL)-L-NORVALINE
B	DB00847	Cysteamine
B	DB01702	2-(3,4-Dihydroxyphenyl)Acetic Acid
A	DB01813	Pyridoxyl-Glutamic Acid-5'-Monophosphate
B	DB02202	1,3-Butanediol
B	DB02260	4-Oxosebacic Acid
B	DB02274	7-Keto-8-Aminopelargonic Acid
B	DB02515	3-Phosphoglycerol
B	DB02582	D-(L-a-Aminoadipoyl)-L-Cysteinyl-D-Isodehydrovaline
B	DB02649	3-Amino-3-Oxopropanoic Acid
B	DB02735	2-Amino-3-Oxo-4-Sulfo-Butyric Acid
B	DB03774	Glutamyl Group
B	DB04034	Ribulose-5-Phosphate
A	DB04205	Thymidine-3',5'-Diphosphate
B	DB04489	Guanidinoethylmercaptosuccinic acid
B	DB04700	GLUTATHIONE SULFINATE
B	DB04714	ISOPENTENYL PYROPHOSPHATE
A	DB04731	1-ACETYL-2-LYSO-SN-GLYCERO-3-PHOSPHOETHANOLAMINE
B	DB07004	2-[(5-hex-1-yn-1-ylfuran-2-yl)carbonyl]-N-methylhydrazinecarbothioamide
B	DB07939	N-(3-MERCAPTOPROPANOYL)-D-ALANINE
B	DB08501	DIETHYL PROPANE-1,3-DIYLBISCARBAMATE
B	DB00523	Alitretinoin
B	DB01736	[3-(Dodecanoylamino)Propyl](Hydroxy)Dimethylammonium
B	DB01783	N-[(2r)-2,4-Dihydroxy-3,3-Dimethylbutanoyl]-Beta-Alanine
B	DB01785	Dimethylallyl Diphosphate
A	DB01899	Nd1-Phosphonohistidine
B	DB01923	L-Xylulose 5-Phosphate
B	DB02124	(2s,3s)-Trans-2,3-Dihydro-3-Hydroxyanthranilic Acid
B	DB02298	5-Hydroxyamino-3-Methyl-Pyrrolidine-2-Carboxylic Acid
B	DB02308	4-(1,3,2-Dioxaborolan-2-Yloxy)Butan-1-Aminium
A	DB02814	3'-Deazo-Thiamin Diphosphate
B	DB02893	D-Methionine
A	DB02965	Ndelta-(N'-Sulphodiaminophosphinyl)-L-Ornithine
B	DB03236	(2s)-4-(Beta-Alanylamino)-2-Aminobutanoic Acid
B	DB03314	Fluorotryptophane
B	DB03710	N5-(1-Imino-3-Butenyl)-L-Ornithine
B	DB03715	Pentadecane
B	DB04058	D-[(Amino)Carbonyl]Phenylalanine
B	DB04388	4-Carboxy-4-Aminobutanal
B	DB04781	5-hydroxyvaleric acid
A	DB07205	N6-ISOPENTENYL-ADENOSINE-5'-MONOPHOSPHATE
B	DB07392	2-CHLORO-4-ISOPROPYLAMINO-6-ETHYLAMINO -1,3,5-TRIAZINE
A	DB07771	[(3,7,11-TRIMETHYL-DODECA-2,6,10-TRIENYLOXYCARBAMOYL)-METHYL]-PHOSPHONIC ACID
B	DB07979	(2E)-3-(3,4-DIHYDROXYPHENYL)-2-IMINOPROPANOIC ACID
B	DB08257	4-{[(CYCLOHEXYLAMINO)CARBONYL]AMINO}BUTANOIC ACID
B	DB08473	5,6-dichloro-1-beta-D-ribofuranosyl-1H-benzimidazole
B	DB08525	HYDROXY[3-(6-METHYLPYRIDIN-2-YL)PROPYL]FORMAMIDE
B	DB08627	(5R)-4-HYDROXY-3,5-DIMETHYL-5-[(1E,3E)-2-METHYLPENTA-1,3-DIENYL]THIOPHEN-2(5H)-ONE
B	DB08689	UBIQUINONE-1
B	DB08786	4-(2-methoxyethoxy)-6-methylpyrimidin-2-amine
B	DB00123	L-Lysine
B	DB00134	L-Methionine
B	DB00138	L-Cystine
B	DB01213	Fomepizole
B	DB01855	5-(Hydroxy-Methyl-Amino)-3-Methyl-Pyrrolidine-2-Carboxylic Acid
B	DB01904	D-Xylitol
B	DB01936	Ribose
C	DB02188	N-Methylmesoporphyrin Containing Copper
B	DB02198	2-Bromoacetyl Group
B	DB02283	2-Phenylamino-Ethanesulfonic Acid
B	DB02327	2-[2-(2-Hydroxy-Ethoxy)-Ethoxy]-Ethanol
B	DB02430	Trehalose-6-Phosphate
B	DB02486	2-Hydroxyethyl Disulfide
A	DB02497	L-Alpha-Glycerophosphorylserine
B	DB02522	Phosphonopyruvate
B	DB02613	Decylamine-N,N-Dimethyl-N-Oxide
B	DB02769	Alpha-L-Arabinofuranose
A	DB03059	Acetoacetyl-Coenzyme A
A	DB03135	[2(Formyl-Hydroxy-Amino)-Ethyl]-Phosphonic Acid
B	DB03335	1-Bromopropane-2-Ol
B	DB03386	4-Fluorotryptophane
B	DB03570	Tris-Hydroxymethyl-Methyl-Ammonium
B	DB03594	1,2,4-Triazole
B	DB03657	1-Deoxy-1-Methoxycarbamido-Beta-D-Glucopyranose
B	DB03673	Beta(2-Thienyl)Alanine
B	DB03733	Ethylene Dichloride
B	DB03747	3ar,5r,6s,7r,7ar-5-Hydroxymethyl-2-Methyl-5,6,7,7a-Tetrahydro-3ah-Pyrano[3,2-D]Thiazole-6,7-Diol
B	DB03760	Dihydrolipoic Acid
B	DB03792	5-Amino-1h-Pyrimidine-2,4-Dione
B	DB03795	2-Dehydropantoate
B	DB03861	(2r,3r,4s,5r)-2-Acetamido-3,4-Dihydroxy-5-Hydroxymethyl-Piperidinium
B	DB03863	2-O-Methyl Fucose
B	DB03967	Dodecyl Sulfate
B	DB04465	Lactose
A	DB04496	4-Phospho-D-Erythronohydroxamic Acid
B	DB04515	6-Deoxy-2-O-Methyl-Alpha-L-Galactopyranose
B	DB07291	5-amino-1-(4-chlorophenyl)-1H-pyrazole-4-carbonitrile
B	DB07652	1-[2-DEOXYRIBOFURANOSYL]-2,4-DIFLUORO-5-METHYL-BENZENE-5'MONOPHOSPHATE
B	DB07720	EPIBATIDINE
B	DB08139	5-chloro-7-[(1-methylethyl)amino]pyrazolo[1,5-a]pyrimidine-3-carbonitrile
B	DB08312	6-CYCLOHEXYLMETHYLOXY-5-NITROSO-PYRIMIDINE-2,4-DIAMINE
B	DB00118	S-Adenosylmethionine
B	DB00331	Metformin
B	DB00550	Propylthiouracil
A	DB00884	Risedronate
B	DB00992	Methyl aminolevulinate
B	DB01197	Captopril
B	DB01202	Levetiracetam
B	DB01849	3,4-Dihydrouracil
B	DB01880	3,4-Dihydroxycinnamic Acid
B	DB02068	Delta-Amino Valeric Acid
B	DB02160	S-Butyryl-Cystein
B	DB02216	S-Methylcysteine
B	DB02518	N-Acetylalanine
B	DB02542	(4s)-5-Fluoro-L-Leucine
B	DB02642	[[N-(Benzyloxycarbonyl)Amino]Methyl]Phosphate
B	DB02689	S-{2-[Amino(Dihydroxy)-Lambda~4~-Sulfanyl]Ethyl}-D-Cysteine
B	DB02838	3,4-Dihydro-2h-Pyrrolium-5-Carboxylate
A	DB03182	Alpha-Fluoro-Carboxymethyldethia Coenzyme a Complex
B	DB03408	Gamma-Glutamylcysteine
B	DB03479	8,9,10-Trihydroxy-7-Hydroxymethyl-3-Methyl-6-Oxa-1,3-Diaza-Spiro[4.5]Decane-2,4-Dione
B	DB03675	2,3-Dihydroxy-Valerianic Acid
B	DB03688	3-Hydroxy-Propanoic Acid
B	DB03731	S-2-(Boronoethyl)-L-Cysteine
B	DB03811	Histidinol
A	DB03821	2-Amino-3-Hydroxy-3-Phosphonooxy-Propionic Acid
B	DB04222	Sparsomycin
B	DB04370	S-sulphocysteine
B	DB04773	METHYL (3R)-3-{[(3R)-3-{[(3R)-3-HYDROXYBUTANOYL]OXY}BUTANOYL]OXY}BUTANOATE
B	DB06931	(1-HYDROXYNONANE-1,1-DIYL)BIS(PHOSPHONIC ACID)
B	DB07387	3-(BUTYLSULPHONYL)-PROPANOIC ACID
B	DB08075	4-(2-amino-1,3-thiazol-4-yl)pyrimidin-2-amine
B	DB08156	3-[4-(AMINOSULFONYL)PHENYL]PROPANOIC ACID
B	DB08256	N-[(CYCLOHEXYLAMINO)CARBONYL]GLYCINE
B	DB08263	N-(CARBOXYCARBONYL)-D-PHENYLALANINE
B	DB00173	Adenine
B	DB00202	Succinylcholine
B	DB00262	Carmustine
B	DB00350	Minoxidil
B	DB01440	Gamma Hydroxybutyric Acid
B	DB01687	Mannobiose
B	DB01856	Pimelic Acid
B	DB02018	Amido Phenyl Pyruvic Acid
B	DB02048	1,2,4-Triazole-Carboxamidine
B	DB02061	Cellobiose
B	DB02078	1-Methoxy-2-[2-(2-Methoxy-Ethoxy]-Ethane
B	DB02280	(R)-Mandelic Acid
B	DB02334	(R)-2-Hydroxy-3-Sulfopropanoic Acid
B	DB02644	N-Omega-Propyl-L-Arginine
B	DB02662	Novo Nordisk a/S Compound
A	DB02694	Pantoyl Adenylate
B	DB02743	Beta-1,4-Galactobioside
B	DB02758	Indolylpropionic Acid
A	DB02907	2-Amino-Vinyl-Phosphate
B	DB02958	Selenomethionine Selenoxide
B	DB02978	Beta-Hydroxyleucine
B	DB03237	2,3-Dihydroxy-5-Oxo-Hexanedioate
B	DB03323	Maltose
B	DB03357	(S)-Mandelic Acid
B	DB03376	'5'-O-(N-(L-Alanyl)-Sulfamoyl)Adenosine
B	DB03414	5-Thio-a/B-D-Mannopyranosylamine
B	DB03425	2s,4r-4-Methylglutamate
B	DB03864	Monothioglycerol
B	DB04001	6-(Oxalyl-Amino)-1h-Indole-5-Carboxylic Acid
B	DB07752	FARNESYL
A	DB07773	5-FLUOROINDOLE PROPANOL PHOSPHATE
B	DB08258	6-{[(CYCLOHEXYLAMINO)CARBONYL]AMINO}HEXANOIC ACID
B	DB08650	(1R,3S,5S,8R)-8-HYDROXY-2-OXABICYCLO[3.3.1]NON-6-ENE-3,5-DICARBOXYLIC ACID
B	DB00156	L-Threonine
B	DB00311	Ethoxzolamide
B	DB00389	Carbimazole
B	DB00988	Dopamine
B	DB01696	7,9-Dihydro-1h-Purine-2,6,8(3h)-Trione
B	DB01818	O3-Sulfonylgalactose
B	DB02530	Gamma(Amino)-Butyric Acid
B	DB02561	Beta-D-Fructopyranose
B	DB02619	Bromo-Dodecanol
B	DB03109	N-Acetyl-D-Allosamine
B	DB03252	D-Lysine
B	DB03392	(3,4,5-Trihydroxy-6-Hydroxymethyl-Tetrahydro-Pyran-2-Yl)-Phosphoramidic Acid Dimethyl Ester
B	DB03538	Nonaethylene Glycol
B	DB03567	N-Acetyl-2-Deoxy-2-Amino-Galactose
B	DB03628	ISO24
B	DB03689	Butyl Group
B	DB03740	2-(Acetylamino)-2-Deoxy-a-D-Glucopyranose
B	DB04101	N-[4-(2,4-Dimethyl-1,3-Thiazol-5-Yl)Pyrimidin-2-Yl]-N'-Hydroxyimidoformamide
B	DB04132	S-Hexylglutathione
B	DB04419	Norleucine
B	DB04719	DIMETHYL-(4,5,6,7-TETRABROMO-1H-BENZOIMIDAZOL-2-YL)-AMINE
B	DB07631	N-DODECYL-N,N-DIMETHYLGLYCINATE
B	DB08074	3-(3-methylbut-2-en-1-yl)-3H-purin-6-amine
B	DB08337	TERT-BUTYL [(1S)-2-METHYL-1-(1,3,4-OXADIAZOL-2-YL)PROPYL]CARBAMATE
B	DB08570	4-(ACETYLAMINO)-3-HYDROXY-5-NITROBENZOIC ACID
B	DB00150	L-Tryptophan
B	DB00885	Pemirolast
B	DB01353	Butethal
B	DB01355	Hexobarbital
B	DB01699	(4e)-4-Aminohex-4-Enoic Acid
B	DB01789	1-Amino-2,3-Dihydroxy-5-Hydroxymethyl Cyclohex-5-Ene
B	DB02065	4-Deoxylactose
B	DB02299	Arginineamide
B	DB02543	Pyrrole-2-Carboxylate
A	DB02696	6-Aminohexyl-Uridine-C1,5'-Diphosphate
B	DB02713	Acetylamino-Acetic Acid
B	DB02780	Beta-3-Cysteine
B	DB02885	4-Imino-5-Methidyl-2-Trifluoromethylpyrimidine
A	DB02931	Coa-S-Acetyl Tryptamine
B	DB03139	6-[5-(2-Oxo-Hexahydro-Thieno[3,4-D]Imidazol-4-Yl)-Pentanoylamino]-Hexanoic Acid
B	DB03963	S-(Dimethylarsenic)Cysteine
B	DB03991	2-Deoxy-2,3-Dehydro-N-Acetyl-Neuraminic Acid
B	DB04082	Decyloxy-Methanol
B	DB04320	2-Bromo-2-Propene-1-Ol
A	DB04403	Colamine Phosphoric Acid
A	DB04524	Malonyl-Coenzyme A
B	DB04560	4,7-Dioxosebacic Acid
A	DB04635	[1-HYDROXY-3-(METHYL-PENTYL-AMINO)-1-PHOSPHONO-PROPYL]-PHOSPHONIC ACID
B	DB07302	(9S,10E,12Z)-9-hydroxyoctadeca-10,12-dienoic acid
B	DB07922	N-oxo-2-(phenylsulfonylamino)ethanamide
B	DB07952	N-[1H-INDOL-3-YL-ACETYL]GLYCINE ACID
B	DB08576	1-(5-TERT-BUTYL-1,3,4-OXADIAZOL-2-YL)-2-(METHYLAMINO)ETHANONE
B	DB08648	8-HYDROXY-2-OXA-BICYCLO[3.3.1]NON-6-ENE-3,5-DICARBOXYLIC ACID
B	DB00544	Fluorouracil
B	DB00558	Zanamivir
B	DB01832	4-[Hydroxy-[Methyl-Phosphinoyl]]-3-Oxo-Butanoic Acid
B	DB01835	4r-Fluoro-N6-Ethanimidoyl-L-Lysine
B	DB01872	Acetylgalactosamine-4-Sulfate
B	DB02605	Pentaethylene Glycol Monodecyl Ether
B	DB02751	N-[Amino(Imino)Methyl]Glycine
B	DB02846	Thioproline
B	DB02961	L-Rhamnose
B	DB03049	S-Selanyl Cysteine
B	DB03094	3,5-Dihydro-5-Methylidene-4h-Imidazol-4-On
B	DB03095	Tetramethylammonium Ion
A	DB03117	2-Carboxypropyl-Coenzyme A
B	DB03411	2-Hydroxymethyl-Pyrrolidine-3,4-Diol
A	DB03855	L-Threonohydroxamate 4-Phosphate
B	DB03892	5-N-Allyl-Arginine
A	DB03931	Diguanosine-5'-Triphosphate
B	DB04386	4,6-O-(1-Carboxyethylidene)-Beta-D-Glucose
B	DB04455	Trimethyl Glycine
B	DB04492	2-(Acetylamino)-2-Deoxy-4-O-Sulfo-Alpha-D-Galactopyranose
B	DB04597	[4,6-O-(1-CARBOXYETHYLIDENE)-BETA-D-MANNOSE]
B	DB04720	S-METHYL-4,5,6,7-TETRABROMO-BENZIMIDAZOLE
B	DB04747	11-TRANS-13-TRANS-15-CIS-OCTADECATRIENOIC ACID
B	DB04749	2-(3-OXO-PROPYLSULFANYLCARBONYL)-ETHANETHIOLATE
B	DB06861	6-(2-HYDROXY-CYCLOPENTYL)-7-OXO-HEPTANAMIDINE
B	DB06906	2-AMINO-4-HYDROXYPYRIMIDINE-5-CARBOXYLIC ACID ETHYL ESTER
B	DB08668	3-(5-AMINO-3-IMINO-3H-PYRAZOL-4-YLAZO)-BENZOIC ACID
B	DB00149	L-Leucine
B	DB00260	Cycloserine
B	DB00534	Chlormerodrin
B	DB01077	Etidronic acid
B	DB01427	Amrinone
B	DB01631	Methyl Nonanoate (Ester)
B	DB01642	O1-Methyl-Glucose
B	DB01799	4-Hydroxy-3-Methyl Butyl Diphosphate
B	DB01979	O1-Methyl-Mannose
B	DB01985	N-Alpha-L-Acetyl-Arginine
B	DB02022	4-Amino-5-Hydroxymethyl-2-Methylpyrimidine
B	DB02028	L-Alpha-Glycerophospho-D-Myo-Inositol-4,5-Bis-Phosphate
B	DB02032	1-(3-Mercapto-2-Methyl-Propionyl)-Pyrrolidine-2-Carboxylic Acid
B	DB02100	Alpha-methyl-D-galactoside
B	DB02239	Laevulinic Acid
B	DB02247	Hydrolyzed Cephalothin
A	DB02257	N-Bromoacetyl-Aminoethyl Phosphate
B	DB02284	1-O-Methyl-Alpha-D-Mannose
B	DB02320	1-N-Acetyl-Beta-D-Glucosamine
B	DB02419	Ethyl Oxo(Piperidin-1-Yl)Acetate
A	DB02849	N-Pyridoxyl-1-Amino-Cyclopropanecarboxylic Acid-5-Monophosphate
B	DB02993	8-Methyl-9-Oxoguanine
B	DB03123	(R)-4-Amino-Isoxazolidin-3-One
B	DB03281	2'-Deoxymaltose
A	DB03292	D-2-Amino-3-Phosphono-Propionic Acid
B	DB03316	1,4-Diethylene Dioxide
B	DB03324	Beta-Methyl-D-Galactoside
B	DB03374	3,5-Diiodotyrosine
A	DB03544	S-Phosphocysteine
B	DB03637	Guanidine-3-Propanol
B	DB03639	1-Guanidinium-7-Aminoheptane
A	DB03923	Feruloyl Coenzyme A
B	DB03939	4-Hydroxy-3,4-Dihydro-1h-Pyrimidin-2-One
B	DB03946	3,4-Dihydroxybenzoic Acid
B	DB04046	Methyl-Beta-Galactose
B	DB04074	Alpha-ketoisovalerate
B	DB04096	5-Amino-5-Deoxy-Cellobiono-1,5-Lactam
B	DB04116	Allolactose
B	DB04153	S-Hydroxymethyl Glutathione
B	DB04171	D-Isovaline
A	DB04174	3'-1-Carboxy-1-Phosphonooxy-Ethoxy-Uridine-Diphosphate-N-Acetylglucosamine
B	DB04279	3-Isopropylmalic Acid
A	DB04290	[2-Cytidylate-O'-Phosphonyloxyl]-Ethyl-Trimethyl-Ammonium
B	DB06894	1-DODECANOL
B	DB06946	(2S,3S)-3-(4-fluorophenyl)-2,3-dihydroxypropanoic acid
B	DB08215	2-T-BUTYLAMINO-4-ETHYLAMINO-6-METHYLTHIO-S-TRIAZINE
B	DB08225	6-PIPERIDIN-1-YLPYRIMIDINE-2,4-DIAMINE 3-OXIDE
B	DB08336	TERT-BUTYL [(1R)-2-METHYL-1-(1,3,4-OXADIAZOL-2-YL)PROPYL]CARBAMATE
B	DB00152	Thiamine
B	DB00201	Caffeine
B	DB00464	Sodium Tetradecyl Sulfate
B	DB00548	Azelaic Acid
B	DB00627	Niacin
B	DB01655	L-Guluronic Acid 6-Phosphate
A	DB01805	Monoisopropylphosphorylserine
B	DB01841	4,6-Dideoxyglucose
B	DB01930	2,4-Dihydroxy-3,3-Dimethyl-Butyrate
B	DB02025	L-D-(a-Aminoadipoyl)-L-Cysteinyl-D-Valine
B	DB02076	6-Phosphogluconic Acid
B	DB02134	Xanthine
A	DB02347	2-Amino-3-(5-Tert-Butyl-3-(Phosphonomethoxy)-4-Isoxazolyl)Propionic Acid
B	DB02470	D-Glycero-D-Mannopyranose-7-Phosphate
B	DB02566	8-Hydroxy-4-(1-Hydroxyethyl)Quinoline-2-Carboxylic Acid
B	DB02955	Ricinoleic Acid
B	DB03184	5-Amino-3-Methyl-Pyrrolidine-2-Carboxylic Acid
B	DB03196	4-Nitrophenyl-Ara
B	DB03223	Diphthamide
A	DB03326	deoxycytidylyl-3',5'-guanosine
B	DB03360	N-Acetylproline
B	DB03548	3-Deoxy-D-Manno-Oct-2-Ulosonic Acid
B	DB03667	Acetic Acid Salicyloyl-Amino-Ester
B	DB03784	Elaidoylamide
B	DB04066	Para-Coumaric Acid
A	DB04067	4-Hydroxybenzyl Coenzyme A
A	DB04121	Guanosine-3'-Monophosphate-5'-Diphosphate
B	DB04126	N-[1-Hydroxycarboxyethyl-Carbonyl]Leucylamino-2-Methyl-Butane
B	DB04224	Oleic Acid
B	DB04369	1,3,2-Dioxaborolan-2-Ol
B	DB04798	THIO-ATPA
B	DB07073	5,5-dimethyl-2-morpholin-4-yl-5,6-dihydro-1,3-benzothiazol-7(4H)-one
B	DB07718	3-(4-HYDROXY-PHENYL)PYRUVIC ACID
B	DB07727	6-ethoxy-1,3-benzothiazole-2-sulfonamide
B	DB07896	(2S)-hydroxy(4-hydroxyphenyl)ethanoic acid
B	DB08120	6,8-DIMERCAPTO-OCTANOIC ACID AMIDE
B	DB08342	S-PALMITOYL-L-CYSTEINE
B	DB00755	Tretinoin
B	DB00982	Isotretinoin
B	DB01322	Kava
A	DB01717	Bis(Adenosine)-5'-Pentaphosphate
B	DB01758	3-Iodo-Tyrosine
B	DB02121	Butyramide
B	DB02176	Mercury Acetate Ion
B	DB02238	4-(Methylsulfanyl)-2-Oxobutanoic Acid
B	DB02294	(5r,6s,7s,8s)-5-Hydroxymethyl-6,7,8-Trihydroxy-Tetrazolo[1,5-a]Piperidine
B	DB02361	S-Methyl Thiocysteine Group
B	DB02415	N-Octyl-2-Hydroxyethyl Sulfoxide
B	DB02471	Nojirimycine Tetrazole
B	DB02508	Isopentyl Pyrophosphate
B	DB02625	(2r)-2-{[Formyl(Hydroxy)Amino]Methyl}Hexanoic Acid
B	DB02774	1,3-Propandiol
A	DB02782	1-Hydroxy-2-(3-Pyridinyl)Ethylidene Bis-Phosphonic Acid
B	DB03071	4-Methylidene-5-One
B	DB03204	5-(Aminomethyl)-2-Methylpyrimidin-4-Amine
B	DB03286	C-(1-Azido-Alpha-D-Glucopyranosyl) Formamide
A	DB03341	Coa-S-Acetyl 5-Bromotryptamine
B	DB03384	Fica
A	DB03416	Thiamin Phosphate
B	DB03502	(4s)-4-{[(2s)-2-Amino-3-Oxopropyl]Sulfanyl}-L-Homoserinate
B	DB03600	Decanoic Acid
B	DB03705	6-Methylamino-5-Nitroisocytosine
B	DB03741	2-Methylbutanoic Acid
B	DB03853	Azo-Dye Hapten
B	DB04072	Alpha-Methylisocitric Acid
B	DB04169	3,5-Diaminophthalhydrazide
A	DB04214	4-Nitrophenyl Phosphate
B	DB04262	3-(7-Hydroxy-8-Ribityllumazine-6-Yl) Propionic Acid
B	DB04401	[Formylmethyl]Trimethyl-Ammonium, N,N,N-Trimethylammonium Acetaldehyde
B	DB04516	2-Deoxy-Glucitol-6-Phosphate
B	DB07370	(3Z,5S,6R,7S,8R,8aS)-3-(octylimino)hexahydro[1,3]thiazolo[3,4-a]pyridine-5,6,7,8-tetrol
B	DB07529	2-IMINO-5-(1-PYRIDIN-2-YL-METH-(E)-YLIDENE)-1,3-THIAZOLIDIN-4-ONE
B	DB07911	(3E)-2,6-DIOXO-6-PHENYLHEX-3-ENOATE
B	DB07992	3-SULFOOXY-1H-INDOLE
B	DB08617	4-(2,2,2-TRIFLUOROETHYL)-L-PHENYLALANINE
B	DB00161	L-Valine
B	DB00277	Theophylline
B	DB00312	Pentobarbital
B	DB00419	Miglustat
A	DB01962	Phosphonotyrosine
A	DB02030	Alpha-Ribazole-5'-Phosphate
B	DB02074	Butenoic Acid
B	DB02210	Hexane-1,6-Diol
B	DB02248	3-Methyl-5-Sulfo-Pyrrolidine-2-Carboxylic Acid
B	DB02326	1-Hydroxyamine-2-Isobutylmalonic Acid
A	DB02433	{[(2,2-Dihydroxy-Ethyl)-(2,3,4,5-Tetrahydroxy-6-Phosphonooxy-Hexyl)-Amino]-Methyl}-Phosphonic Acid
B	DB02492	Ghavamiol
B	DB02624	Homoserine Lactone
B	DB02707	Pentyl Trihydrogen Diphosphate
B	DB02725	2-Amino-4-(4-Amino-Cyclohexa-2,5-Dienyl)-Butyric Acid
B	DB03019	4-(2,5-Dichloro-Thiophen-3-Yl)-Pyrimidin-2-Ylamine
B	DB03422	1,3-Thiazole-4-Carboxylic Acid
B	DB03660	Iodo-Phenylalanine
B	DB03856	Alpha-Difluoromethylornithine
B	DB03872	2,3-Dideoxyfucose
B	DB04235	4-Amino Hexanoic Acid
B	DB04486	(2s)-2,8-Diaminooctanoic Acid
B	DB04713	4-IODOPHENYLALANINE
B	DB06926	(9Z,11E,13S)-13-hydroxyoctadeca-9,11-dienoic acid
B	DB06979	5-(dodecylthio)-1H-1,2,3-triazole-4-carboxylic acid
D	DB07001	(3S,5E)-3-propyl-3,4-dihydrothieno[2,3-f][1,4]oxazepin-5(2H)-imine
B	DB07637	3,5 DIBROMOTYROSINE
B	DB07907	(2S)-2-HYDROXYOCTANOIC ACID
B	DB08593	1,2,5-THIADIAZOLIDIN-3-ONE-1,1-DIOXIDE
B	DB08606	(3R,4S)-1-[(4-AMINO-5H-PYRROLO[3,2-D]PYRIMIDIN-7-YL)METHYL]-4-[(METHYLSULFANYL)METHYL]PYRROLIDIN-3-OL
B	DB08779	2-(methylsulfanyl)-5-(thiophen-2-ylmethyl)-1H-imidazol-4-ol
